# Supplementary material
Source: HighWire-hosted journal article supplement (doi:10.1101/rna.080409.125)
Supplement: Supplemental_Table_1_.xlsx [file Supplemental_Table_1_.xlsx]

## Sheet: Supplementary Table 1
Dataset ID	System	Stress Type	SG bait	Technique	Condition	Reference	DOI	GEO ID	Source file > selected columns	Additional analysis
U2OS_ars_G3BP1_bp_wt	U-2 OS osteosarcoma cell line	arsenite	G3BP1	Biochemical purification (bp) > RNA-seq	wild type	Khong et al., 2017	https://doi.org/10.1016/j.molcel.2017.10.015	GSE99304	Data S1 > mRNA and ncRNA datasheets > "Localization" enriched	none
U2OS_ars_ΔEDC3_bp	U-2 OS osteosarcoma cell line	arsenite	ΔEDC3; removal of P-body RNAs from RNAs in stress-induced RNP granules	Biochemical purification (bp) > RNA-seq	wild type	Matheny et al., 2019	https://doi.org/10.1128/MCB.00313-19	GSE138988	GSE138988_gene_exp_stress_pellet.diff.gz and GSE138988_gene_exp_WT_PB.diff.gz > "significant" yes, "log2(fold_change)" <0	removal of PB genes in GSE138988_gene_exp_WT_PB.diff.gz from GSE138988_gene_exp_stress_pellet.diff.gz
U2OS_sorb_G3BP1_bp_wt	U-2 OS osteosarcoma cell line	sorbitol	G3BP1	Biochemical purification (bp) > RNA-seq	wild type	Matheny et al., 2021	https://doi.org/10.1261/rna.078204.120	GSE119977	GSE119977_Supplemental_Table_Processed.xls.gz > "G3BP SORB localization" enriched	none
U2OS_ars_PABPC1_bp_wt	U-2 OS osteosarcoma cell line	arsenite	PABPC1	Biochemical purification (bp) > RNA-seq	wild type	Matheny et al., 2021	https://doi.org/10.1261/rna.078204.120	GSE119977	GSE119977_Supplemental_Table_Processed.xls.gz > > "ARS localization" enriched	none
U2OS_sorb_PABPC1_bp_wt	U-2 OS osteosarcoma cell line	sorbitol	PABPC1	Biochemical purification (bp) > RNA-seq	wild type	Matheny et al., 2021	https://doi.org/10.1261/rna.078204.120	GSE119977	GSE119977_Supplemental_Table_Processed.xls.gz > "SORB localization" enriched	none
U2OS_sorb_PABPC1_bp_G3BPko	U-2 OS osteosarcoma cell line	sorbitol	PABPC1	Biochemical purification (bp) > RNA-seq	cells lacking G3BP1/2	Matheny et al., 2021	https://doi.org/10.1261/rna.078204.120	GSE119977	GSE119977_Supplemental_Table_Processed.xls.gz > "SORB KO localization" enriched	none
U2OS_virus_G3BP1_bp_wt	U-2 OS osteosarcoma cell line	feline calicivirus infection	G3BP1	Biochemical purification (bp) > RNA-seq	wild type	Iadevaia et al., 2022	https://doi.org/10.1242/jcs.259194	GSE171655	Table S8	none
Tcell_stim_G3BP1_bp_wt	primary T lymphocytes	CD3/CD28 antibody-coated beads	G3BP1	Biochemical purification (bp) > RNA-seq	wild type	Curdy et al., 2023	https://doi.org/10.1016/j.celrep.2023.112211	GSE197001	Table S2 > SG vs CYT	none, selection for Fold change >2, p-value <0.01 as reported in the reference publication
HeLa_ars_G3BP1_bp_wt	HeLa cervical adenocarcinoma cell line	arsenite	G3BP1	Biochemical purification (bp) > RNA-seq	wild type	Kudrin et al., 2024	https://doi.org/10.1038/s44319-024-00098-6	GSE212380	GSE212380_SG_enrichment.xlsx > Significant enrichment in SG > WT enriched p.adj.<0.05	none
HeLa_ars_G3BP1_bp_NAT10ko	HeLa cervical adenocarcinoma cell line	arsenite	G3BP1	Biochemical purification (bp) > RNA-seq	cells lacking NAT10	Kudrin et al., 2024	https://doi.org/10.1038/s44319-024-00098-6	GSE212380	GSE212380_SG_enrichment.xlsx > Significant enrichment in SG > NAT 10 enriched p.adj.<0.05	none
SKNBE_ars_G3BP1_bp_FUS-wt	SK-N-BE neuroblastoma cell line	arsenite	G3BP1	Biochemical purification (bp) > RNA-seq	doxycycline-inducible FUS wild type	Mariani et al., 2024	https://doi.org/10.1093/nar/gkae942	GSE244751	Supplementary Table S1 > FUS-WT_SG_Enrichment > "SG_VS_INP" enr	none
SKNBE_ars_G3BP1_bp_FUS-P525L	SK-N-BE neuroblastoma cell line	arsenite	G3BP1	Biochemical purification (bp) > RNA-seq	doxycycline-inducible FUS-P525L	Mariani et al., 2024	https://doi.org/10.1093/nar/gkae942	GSE244751	Supplementary Table S1 > FUS-P525L_SG_Enrichment > "SG_VS_INP" enr	none
SMMC_ars_G3BP1_bp_wt	SMMC-7721 cervical adenocarcinoma cell line	arsenite	G3BP1	Biochemical purification (bp) > RNA-seq	wild type	Chen et al., 2023	https://doi.org/10.1016/j.gpb.2022.01.003	HRA001512	Mariani et al., 2024 Supplementary Table S1 > SG_Chen_et_al_2022_Re-analysis > "SG_VS_INP" enr	none
U251_ars_G3BP1_bp_wt	U-251 astrocytoma cell line	arsenite	G3BP1	RNA immunoprecipitation > microarray	wild type	Weeks et al., 2016	https://doi.org/10.1016/j.ajpath.2016.02.013	GSE76814	Complete analysis.xlsx provided by the authors > G3BP1	none
U251_ars_TIAL1_bp_wt	U-251 astrocytoma cell line	arsenite	TIAL1	RNA immunoprecipitation > microarray	wild type	Weeks et al., 2016	https://doi.org/10.1016/j.ajpath.2016.02.013	GSE76814	Complete analysis.xlsx provided by the authors > TIAL1	none
HEK293T_hip_elF4A1_pl_wt	HEK293T embryonal kidney cell line	hippuristanol	eIF4A1	Proximity-labelling (pl) > affinity purification > RNA-seq	wild type	Padrón et al., 2019	https://doi.org/10.1016/j.molcel.2019.07.030	GSE121575	GSE121575_4A_heatshock_counts.csv.gz > HIP	pulldown vs input > edgeR differential analysis with log2FC >0.75, p.value <0.05
HEK293T_heat_elF4A1_pl_wt	HEK293T embryonal kidney cell line	heat shock	eIF4A1	Proximity-labelling (pl) > affinity purification > RNA-seq	wild type	Padrón et al., 2019	https://doi.org/10.1016/j.molcel.2019.07.030	GSE121575	GSE121575_4A_heatshock_counts.csv.gz > T20	pulldown vs input > edgeR differential analysis with log2FC >0.75, p.value <0.05
PC3_ars_G3BP1_pl_wt	PC-3 prostate cancer cell line	arsenite	G3BP1	Proximity-labelling (pl) > affinity purification > RNA-seq	wild type	Somasekharan et al., 2020	https://doi.org/10.1093/nar/gkaa376	GSE138058	Table_S5_RNAseq_G3BP1-APEX-ARS_CTRL-APEX-ARS.xlsx > "significant" yes	none
HEK293T_ars_G3BP1_pl_wt	HEK293T embryonal kidney cell line	arsenite	G3BP1	Proximity-labelling (pl) > affinity purification > RNA-seq	wild type	Ren et al., 2023	https://doi.org/10.1038/s41467-023-43194-2	GSE223295	Supplementary Data 1A > "SG-proximity?" 1	none
HEK293T_sorb_G3BP1_pl_wt	HEK293T embryonal kidney cell line	sorbitol	G3BP1	Proximity-labelling (pl) > affinity purification > RNA-seq	wild type	Ren et al., 2023	https://doi.org/10.1038/s41467-023-43194-2	GSE223295	Supplementary Data 1B > "SG-proximity?" 1	none
U2OS_ars_G3BP1_pl_wt	U-2 OS osteosarcoma cell line	arsenite	G3BP1	Proximity-labelling (pl) > affinity purification > RNA-seq	wild type	Ren et al., 2023	https://doi.org/10.1038/s41467-023-43194-2	GSE223295	Supplementary Data 2 > "SG-proximity?" 1	none
HeLa_ars_G3BP1_pic_wt	HeLa cervical adenocarcinoma cell line	arsenite	G3BP1	Photo-isolation chemistry (pic) > RNA-seq	wild type	Honda et al., 2021	https://doi.org/10.1038/s41467-021-24691-8	GSE143413	GSE143413_UMI_count_StressGranule.csv.gz	SG-posi vs SG-nega > edgeR differential analysis with log2FC >0.75, p.value <0.05
HeLa_ars_G3BP1_fanci_wt	HeLa cervical adenocarcinoma cell line	arsenite	G3BP1	Fluorescence-activated non-membrane condensates isolation (FANCI) > RNA-seq	wild type	Zhou et al., 2024	https://doi.org/10.1016/j.cell.2024.02.028	GSE218180	GSE218180_featureCounts_geneBody_counts.tsv.gz > s4,s5,s6,s16,s17,s18	Total RNA from SG vs Total RNA > edgeR differential analysis with log2FC >0.75, p.value <0.05
HeLa_heat_G3BP1_fanci_wt	HeLa cervical adenocarcinoma cell line	heat shock	G3BP1	Fluorescence-activated non-membrane condensates isolation (FANCI) > RNA-seq	wild type	Zhou et al., 2024	https://doi.org/10.1016/j.cell.2024.02.028	GSE218180	GSE218180_featureCounts_geneBody_counts.tsv.gz > s7,s8,s9,s19,s20,s21	Total RNA from SG vs Total RNA > edgeR differential analysis with log2FC >0.75, p.value <0.05
HeLa_osm_G3BP1_fanci_wt	HeLa cervical adenocarcinoma cell line	NaCl osmosis	G3BP1	Fluorescence-activated non-membrane condensates isolation (FANCI) > RNA-seq	wild type	Zhou et al., 2024	https://doi.org/10.1016/j.cell.2024.02.028	GSE218180	GSE218180_featureCounts_geneBody_counts.tsv.gz > s10,s11,s12,s22,s23,s24	Total RNA from SG vs Total RNA > edgeR differential analysis with log2FC >0.75, p.value <0.05
HeLa_UV_G3BP1_fanci_wt	HeLa cervical adenocarcinoma cell line	UV-light (4sU+UVA)	G3BP1	Fluorescence-activated non-membrane condensates isolation (FANCI) > RNA-seq	wild type	Zhou et al., 2024	https://doi.org/10.1016/j.cell.2024.02.028	GSE218180	GSE218180_featureCounts_geneBody_counts.tsv.gz > s13,s14,s15,s25,s26,s27	Total RNA from SG vs Total RNA > edgeR differential analysis with log2FC >0.75, p.value <0.05
