# Supplementary material
Source: HighWire-hosted journal article supplement (doi:10.1101/rna.080409.125)
Supplement: Supplemental_Table_2_.xlsx [file Supplemental_Table_2_.xlsx]

## Sheet: Supplementary Table 2
Title	System	Stress Type	SG bait	Condition	Technique	Reference	DOI	Notes for exclusion from meta-analysis
Systematic Characterization of Stress-Induced RNA Granulation	NIH 3T3 mouse fibroblasts	thapsigargin-induced ER stress	none, stress-induced cytoplasmic RNP granules	wild type	Biochemical purification (bp) > RNA-seq	Namkoong et al., 2017	https://doi.org/10.1016/j.molcel.2018.02.025	mouse, no SG specific
Integrated multi-omics reveals common properties underlying stress granule and P-body formation	Saccharomyces cerevisiae	glucose depletion	Pbp1	wild type	RNA immunoprecipitation > RNA-seq	Kershaw et al., 2021	https://doi.org/10.1080/15476286.2021.1976986	yeast
Identification of the stress granule transcriptome via RNA-editing in single cells and in vivo	Drosophila S2 cells and neurons	arsenite	FMR1	wild type	hyperTRIBE (RNA editing) > RNA-seq	van Leeuwen et al., 2022	https://doi.org/10.1016/j.crmeth.2022.100235	drosophila
Stress granules sequester Alzheimer’s disease-associated gene transcripts and regulate disease-related neuronal proteostasis	SH-SY5Y neuroblastoma cell line	arsenite	G3BP1	wild type	Biochemical purification (bp) > RNA-seq	Sato et al., 2023	https://doi.org/10.18632/aging.204737	only one replicate for differential analysis
m6A governs length-dependent enrichment of mRNAs in stress granules	Mouse embryonic fibroblasts	arsenite, heat shock, thapsigargin, sorbitol	TIAL1	tamoxifen-inducible Mettl3-knockout	Biochemical purification (bp) > RNA-seq	Ries et al., 2023	https://doi.org/10.1038/s41594-023-01089-2	mouse
Content of stress granules reveals a sex difference at the early phase of cold exposure in mice	Brown adipose tissue	cold stress	none, stress-induced cytoplasmic RNP granules	wild type	Biochemical purification (bp) > RNA-seq	Cheung et al., 2024	https://doi.org/10.1152/ajpendo.00317.2023	mouse, no SG specific
