# Supplementary material
Source: HighWire-hosted journal article supplement (doi:10.1101/rna.080409.125)
Supplement: Supplemental_Table_3_.xlsx [file Supplemental_Table_3_.xlsx]

## Sheet: Supplementary Table 3
dataset_ID	gene_symbol	HGNC_updated	system	stress_type	technique	consensus	comb_technique	consensus_comb_technique (+1 reward)	consensus_class
HEK293T_heat_elF4A1_pl_wt	5_8S_rRNA	FALSE	HEK293T	heatshock	pl	2	pl	2	low
HEK293T_hip_elF4A1_pl_wt	5_8S_rRNA	FALSE	HEK293T	hippuristanol	pl	2	pl	2	low
U2OS_ars_ΔEDC3_bp	A1BG-AS1	TRUE	U-2 OS	arsenite	bp	5	bp	5	medium
U2OS_ars_G3BP1_bp_wt	A1BG-AS1	TRUE	U-2 OS	arsenite	bp	5	bp	5	medium
U2OS_ars_PABPC1_bp_wt	A1BG-AS1	TRUE	U-2 OS	arsenite	bp	5	bp	5	medium
U2OS_sorb_G3BP1_bp_wt	A1BG-AS1	TRUE	U-2 OS	sorbitol	bp	5	bp	5	medium
SKNBE_ars_G3BP1_bp_FUS	A1BG-AS1	TRUE	SK-N-BE	arsenite	bp	5	bp	5	medium
U2OS_ars_G3BP1_bp_wt	A2M	TRUE	U-2 OS	arsenite	bp	1	bp	1	low
HEK293T_heat_elF4A1_pl_wt	A2ML1-AS2	TRUE	HEK293T	heatshock	pl	1	pl	1	low
HeLa_ars_G3BP1_fanci_wt	A2MP1	TRUE	HeLa	arsenite	fanci	3	fanci	3	low
HeLa_heat_G3BP1_fanci_wt	A2MP1	TRUE	HeLa	heatshock	fanci	3	fanci	3	low
HeLa_osm_G3BP1_fanci_wt	A2MP1	TRUE	HeLa	osmosis	fanci	3	fanci	3	low
HEK293T_heat_elF4A1_pl_wt	A3GALT2	TRUE	HEK293T	heatshock	pl	1	pl	1	low
SMMC_ars_G3BP1_bp_wt	A4GALT	TRUE	SMMC-7721	arsenite	bp	1	bp	1	low
HeLa_osm_G3BP1_fanci_wt	AAAS	TRUE	HeLa	osmosis	fanci	1	fanci	1	low
U2OS_ars_ΔEDC3_bp	AACS	TRUE	U-2 OS	arsenite	bp	1	bp	1	low
HEK293T_ars_G3BP1_pl_wt	AAGAB	TRUE	HEK293T	arsenite	pl	4	bp_pl_fanci	5	medium
PC3_ars_G3BP1_pl_wt	AAGAB	TRUE	PC3	arsenite	bp	4	bp_pl_fanci	5	medium
HeLa_ars_G3BP1_fanci_wt	AAGAB	TRUE	HeLa	arsenite	fanci	4	bp_pl_fanci	5	medium
HeLa_heat_G3BP1_fanci_wt	AAGAB	TRUE	HeLa	heatshock	fanci	4	bp_pl_fanci	5	medium
Tcell_stim_G3BP1_bp_wt	AAK1	TRUE	T cell	stimulation	bp	13	bp_fanci	14	high
U2OS_ars_G3BP1_bp_wt	AAK1	TRUE	U-2 OS	arsenite	bp	13	bp_fanci	14	high
U2OS_ars_PABPC1_bp_wt	AAK1	TRUE	U-2 OS	arsenite	bp	13	bp_fanci	14	high
U2OS_sorb_PABPC1_bp_wt	AAK1	TRUE	U-2 OS	sorbitol	bp	13	bp_fanci	14	high
U2OS_sorb_G3BP1_bp_wt	AAK1	TRUE	U-2 OS	sorbitol	bp	13	bp_fanci	14	high
U2OS_virus_G3BP1_bp_wt	AAK1	TRUE	U-2 OS	virus	bp	13	bp_fanci	14	high
HeLa_ars_G3BP1_bp_wt	AAK1	TRUE	HeLa	arsenite	bp	13	bp_fanci	14	high
HeLa_ars_G3BP1_fanci_wt	AAK1	TRUE	HeLa	arsenite	fanci	13	bp_fanci	14	high
HeLa_heat_G3BP1_fanci_wt	AAK1	TRUE	HeLa	heatshock	fanci	13	bp_fanci	14	high
HeLa_osm_G3BP1_fanci_wt	AAK1	TRUE	HeLa	osmosis	fanci	13	bp_fanci	14	high
HeLa_UV_G3BP1_fanci_wt	AAK1	TRUE	HeLa	UV-light	fanci	13	bp_fanci	14	high
SKNBE_ars_G3BP1_bp_FUS	AAK1	TRUE	SK-N-BE	arsenite	bp	13	bp_fanci	14	high
SKNBE_ars_G3BP1_bp_FUS-P525L	AAK1	TRUE	SK-N-BE	arsenite	bp	13	bp_fanci	14	high
PC3_ars_G3BP1_pl_wt	AAMDC	TRUE	PC3	arsenite	bp	1	bp	1	low
U2OS_ars_G3BP1_pl_wt	AAMP	TRUE	U-2 OS	arsenite	pl	5	bp_pl_fanci	6	medium
Tcell_stim_G3BP1_bp_wt	AAMP	TRUE	T cell	stimulation	bp	5	bp_pl_fanci	6	medium
U2OS_ars_ΔEDC3_bp	AAMP	TRUE	U-2 OS	arsenite	bp	5	bp_pl_fanci	6	medium
HEK293T_heat_elF4A1_pl_wt	AAMP	TRUE	HEK293T	heatshock	pl	5	bp_pl_fanci	6	medium
HeLa_osm_G3BP1_fanci_wt	AAMP	TRUE	HeLa	osmosis	fanci	5	bp_pl_fanci	6	medium
HEK293T_ars_G3BP1_pl_wt	AARS1	TRUE	HEK293T	arsenite	pl	6	bp_pl_fanci	7	medium
U2OS_ars_ΔEDC3_bp	AARS1	TRUE	U-2 OS	arsenite	bp	6	bp_pl_fanci	7	medium
U2OS_ars_G3BP1_bp_wt	AARS1	TRUE	U-2 OS	arsenite	bp	6	bp_pl_fanci	7	medium
HeLa_ars_G3BP1_fanci_wt	AARS1	TRUE	HeLa	arsenite	fanci	6	bp_pl_fanci	7	medium
HeLa_osm_G3BP1_fanci_wt	AARS1	TRUE	HeLa	osmosis	fanci	6	bp_pl_fanci	7	medium
SMMC_ars_G3BP1_bp_wt	AARS1	TRUE	SMMC-7721	arsenite	bp	6	bp_pl_fanci	7	medium
Tcell_stim_G3BP1_bp_wt	AARS2	TRUE	T cell	stimulation	bp	6	bp	6	medium
U2OS_ars_ΔEDC3_bp	AARS2	TRUE	U-2 OS	arsenite	bp	6	bp	6	medium
U2OS_ars_G3BP1_bp_wt	AARS2	TRUE	U-2 OS	arsenite	bp	6	bp	6	medium
U2OS_ars_PABPC1_bp_wt	AARS2	TRUE	U-2 OS	arsenite	bp	6	bp	6	medium
SKNBE_ars_G3BP1_bp_FUS	AARS2	TRUE	SK-N-BE	arsenite	bp	6	bp	6	medium
SMMC_ars_G3BP1_bp_wt	AARS2	TRUE	SMMC-7721	arsenite	bp	6	bp	6	medium
Tcell_stim_G3BP1_bp_wt	AASDH	TRUE	T cell	stimulation	bp	2	bp_fanci	3	low
HeLa_heat_G3BP1_fanci_wt	AASDH	TRUE	HeLa	heatshock	fanci	2	bp_fanci	3	low
HEK293T_sorb_G3BP1_pl_wt	AASDHPPT	TRUE	HEK293T	sorbitol	pl	7	bp_pl_fanci	8	medium
U2OS_ars_G3BP1_pl_wt	AASDHPPT	TRUE	U-2 OS	arsenite	pl	7	bp_pl_fanci	8	medium
PC3_ars_G3BP1_pl_wt	AASDHPPT	TRUE	PC3	arsenite	bp	7	bp_pl_fanci	8	medium
HeLa_ars_G3BP1_fanci_wt	AASDHPPT	TRUE	HeLa	arsenite	fanci	7	bp_pl_fanci	8	medium
HeLa_heat_G3BP1_fanci_wt	AASDHPPT	TRUE	HeLa	heatshock	fanci	7	bp_pl_fanci	8	medium
HeLa_osm_G3BP1_fanci_wt	AASDHPPT	TRUE	HeLa	osmosis	fanci	7	bp_pl_fanci	8	medium
HeLa_UV_G3BP1_fanci_wt	AASDHPPT	TRUE	HeLa	UV-light	fanci	7	bp_pl_fanci	8	medium
U2OS_ars_ΔEDC3_bp	AATBC	TRUE	U-2 OS	arsenite	bp	1	bp	1	low
Tcell_stim_G3BP1_bp_wt	AATF	TRUE	T cell	stimulation	bp	2	bp	2	low
U251_ars_TIAL1_bp_wt	AATF	TRUE	U251	arsenite	bp	2	bp	2	low
SKNBE_ars_G3BP1_bp_FUS	AATK	TRUE	SK-N-BE	arsenite	bp	2	bp	2	low
SKNBE_ars_G3BP1_bp_FUS-P525L	AATK	TRUE	SK-N-BE	arsenite	bp	2	bp	2	low
HeLa_ars_G3BP1_fanci_wt	ABCA1	TRUE	HeLa	arsenite	fanci	3	fanci	3	low
HeLa_heat_G3BP1_fanci_wt	ABCA1	TRUE	HeLa	heatshock	fanci	3	fanci	3	low
HeLa_osm_G3BP1_fanci_wt	ABCA1	TRUE	HeLa	osmosis	fanci	3	fanci	3	low
Tcell_stim_G3BP1_bp_wt	ABCA2	TRUE	T cell	stimulation	bp	5	bp	5	medium
U2OS_ars_ΔEDC3_bp	ABCA2	TRUE	U-2 OS	arsenite	bp	5	bp	5	medium
U2OS_virus_G3BP1_bp_wt	ABCA2	TRUE	U-2 OS	virus	bp	5	bp	5	medium
SKNBE_ars_G3BP1_bp_FUS	ABCA2	TRUE	SK-N-BE	arsenite	bp	5	bp	5	medium
SMMC_ars_G3BP1_bp_wt	ABCA2	TRUE	SMMC-7721	arsenite	bp	5	bp	5	medium
U2OS_ars_ΔEDC3_bp	ABCA3	TRUE	U-2 OS	arsenite	bp	3	bp_pic	4	medium
HeLa_ars_G3BP1_pic_wt	ABCA3	TRUE	HeLa	arsenite	pic	3	bp_pic	4	medium
SKNBE_ars_G3BP1_bp_FUS	ABCA3	TRUE	SK-N-BE	arsenite	bp	3	bp_pic	4	medium
U2OS_ars_ΔEDC3_bp	ABCA4	TRUE	U-2 OS	arsenite	bp	1	bp	1	low
Tcell_stim_G3BP1_bp_wt	ABCA5	TRUE	T cell	stimulation	bp	4	bp_fanci	5	medium
HeLa_ars_G3BP1_fanci_wt	ABCA5	TRUE	HeLa	arsenite	fanci	4	bp_fanci	5	medium
HeLa_heat_G3BP1_fanci_wt	ABCA5	TRUE	HeLa	heatshock	fanci	4	bp_fanci	5	medium
HeLa_UV_G3BP1_fanci_wt	ABCA5	TRUE	HeLa	UV-light	fanci	4	bp_fanci	5	medium
SMMC_ars_G3BP1_bp_wt	ABCA7	TRUE	SMMC-7721	arsenite	bp	1	bp	1	low
Tcell_stim_G3BP1_bp_wt	ABCB1	TRUE	T cell	stimulation	bp	1	bp	1	low
U2OS_ars_G3BP1_pl_wt	ABCB10	TRUE	U-2 OS	arsenite	pl	4	bp_pl_fanci	5	medium
U2OS_ars_ΔEDC3_bp	ABCB10	TRUE	U-2 OS	arsenite	bp	4	bp_pl_fanci	5	medium
HeLa_ars_G3BP1_fanci_wt	ABCB10	TRUE	HeLa	arsenite	fanci	4	bp_pl_fanci	5	medium
HeLa_heat_G3BP1_fanci_wt	ABCB10	TRUE	HeLa	heatshock	fanci	4	bp_pl_fanci	5	medium
Tcell_stim_G3BP1_bp_wt	ABCB6	TRUE	T cell	stimulation	bp	1	bp	1	low
Tcell_stim_G3BP1_bp_wt	ABCB7	TRUE	T cell	stimulation	bp	5	bp_pic_fanci	6	medium
HeLa_ars_G3BP1_pic_wt	ABCB7	TRUE	HeLa	arsenite	pic	5	bp_pic_fanci	6	medium
HeLa_ars_G3BP1_fanci_wt	ABCB7	TRUE	HeLa	arsenite	fanci	5	bp_pic_fanci	6	medium
HeLa_heat_G3BP1_fanci_wt	ABCB7	TRUE	HeLa	heatshock	fanci	5	bp_pic_fanci	6	medium
HeLa_UV_G3BP1_fanci_wt	ABCB7	TRUE	HeLa	UV-light	fanci	5	bp_pic_fanci	6	medium
U2OS_ars_ΔEDC3_bp	ABCB8	TRUE	U-2 OS	arsenite	bp	1	bp	1	low
Tcell_stim_G3BP1_bp_wt	ABCC1	TRUE	T cell	stimulation	bp	5	bp_pic	6	medium
U2OS_sorb_PABPC1_bp_G3BPko	ABCC1	TRUE	U-2 OS	sorbitol	bp	5	bp_pic	6	medium
U2OS_virus_G3BP1_bp_wt	ABCC1	TRUE	U-2 OS	virus	bp	5	bp_pic	6	medium
HeLa_ars_G3BP1_pic_wt	ABCC1	TRUE	HeLa	arsenite	pic	5	bp_pic	6	medium
SKNBE_ars_G3BP1_bp_FUS	ABCC1	TRUE	SK-N-BE	arsenite	bp	5	bp_pic	6	medium
Tcell_stim_G3BP1_bp_wt	ABCC10	TRUE	T cell	stimulation	bp	2	bp	2	low
U2OS_ars_ΔEDC3_bp	ABCC10	TRUE	U-2 OS	arsenite	bp	2	bp	2	low
U2OS_ars_ΔEDC3_bp	ABCC2	TRUE	U-2 OS	arsenite	bp	1	bp	1	low
HEK293T_sorb_G3BP1_pl_wt	ABCC4	TRUE	HEK293T	sorbitol	pl	5	bp_pl	6	medium
U2OS_ars_G3BP1_pl_wt	ABCC4	TRUE	U-2 OS	arsenite	pl	5	bp_pl	6	medium
Tcell_stim_G3BP1_bp_wt	ABCC4	TRUE	T cell	stimulation	bp	5	bp_pl	6	medium
U2OS_ars_ΔEDC3_bp	ABCC4	TRUE	U-2 OS	arsenite	bp	5	bp_pl	6	medium
PC3_ars_G3BP1_pl_wt	ABCC4	TRUE	PC3	arsenite	bp	5	bp_pl	6	medium
Tcell_stim_G3BP1_bp_wt	ABCC5	TRUE	T cell	stimulation	bp	3	bp	3	low
U2OS_ars_ΔEDC3_bp	ABCC5	TRUE	U-2 OS	arsenite	bp	3	bp	3	low
SKNBE_ars_G3BP1_bp_FUS	ABCC5	TRUE	SK-N-BE	arsenite	bp	3	bp	3	low
HEK293T_hip_elF4A1_pl_wt	ABCC6P1	TRUE	HEK293T	hippuristanol	pl	1	pl	1	low
PC3_ars_G3BP1_pl_wt	ABCC9	TRUE	PC3	arsenite	bp	1	bp	1	low
Tcell_stim_G3BP1_bp_wt	ABCD1	TRUE	T cell	stimulation	bp	2	bp	2	low
SMMC_ars_G3BP1_bp_wt	ABCD1	TRUE	SMMC-7721	arsenite	bp	2	bp	2	low
HEK293T_sorb_G3BP1_pl_wt	ABCD3	TRUE	HEK293T	sorbitol	pl	5	bp_pl_fanci	6	medium
U2OS_ars_G3BP1_pl_wt	ABCD3	TRUE	U-2 OS	arsenite	pl	5	bp_pl_fanci	6	medium
Tcell_stim_G3BP1_bp_wt	ABCD3	TRUE	T cell	stimulation	bp	5	bp_pl_fanci	6	medium
HeLa_ars_G3BP1_fanci_wt	ABCD3	TRUE	HeLa	arsenite	fanci	5	bp_pl_fanci	6	medium
HeLa_osm_G3BP1_fanci_wt	ABCD3	TRUE	HeLa	osmosis	fanci	5	bp_pl_fanci	6	medium
HEK293T_sorb_G3BP1_pl_wt	ABCE1	TRUE	HEK293T	sorbitol	pl	7	bp_pl_fanci	8	medium
U2OS_ars_G3BP1_pl_wt	ABCE1	TRUE	U-2 OS	arsenite	pl	7	bp_pl_fanci	8	medium
Tcell_stim_G3BP1_bp_wt	ABCE1	TRUE	T cell	stimulation	bp	7	bp_pl_fanci	8	medium
HeLa_ars_G3BP1_fanci_wt	ABCE1	TRUE	HeLa	arsenite	fanci	7	bp_pl_fanci	8	medium
HeLa_heat_G3BP1_fanci_wt	ABCE1	TRUE	HeLa	heatshock	fanci	7	bp_pl_fanci	8	medium
HeLa_osm_G3BP1_fanci_wt	ABCE1	TRUE	HeLa	osmosis	fanci	7	bp_pl_fanci	8	medium
HeLa_UV_G3BP1_fanci_wt	ABCE1	TRUE	HeLa	UV-light	fanci	7	bp_pl_fanci	8	medium
Tcell_stim_G3BP1_bp_wt	ABCF1	TRUE	T cell	stimulation	bp	4	bp_fanci	5	medium
HeLa_ars_G3BP1_fanci_wt	ABCF1	TRUE	HeLa	arsenite	fanci	4	bp_fanci	5	medium
HeLa_osm_G3BP1_fanci_wt	ABCF1	TRUE	HeLa	osmosis	fanci	4	bp_fanci	5	medium
SMMC_ars_G3BP1_bp_wt	ABCF1	TRUE	SMMC-7721	arsenite	bp	4	bp_fanci	5	medium
U2OS_ars_ΔEDC3_bp	ABCF2	TRUE	U-2 OS	arsenite	bp	4	bp_fanci	5	medium
HeLa_ars_G3BP1_fanci_wt	ABCF2	TRUE	HeLa	arsenite	fanci	4	bp_fanci	5	medium
HeLa_heat_G3BP1_fanci_wt	ABCF2	TRUE	HeLa	heatshock	fanci	4	bp_fanci	5	medium
HeLa_osm_G3BP1_fanci_wt	ABCF2	TRUE	HeLa	osmosis	fanci	4	bp_fanci	5	medium
HEK293T_heat_elF4A1_pl_wt	ABCF2P1	TRUE	HEK293T	heatshock	pl	1	pl	1	low
Tcell_stim_G3BP1_bp_wt	ABCF3	TRUE	T cell	stimulation	bp	2	bp	2	low
U2OS_ars_ΔEDC3_bp	ABCF3	TRUE	U-2 OS	arsenite	bp	2	bp	2	low
Tcell_stim_G3BP1_bp_wt	ABCG1	TRUE	T cell	stimulation	bp	3	bp	3	low
U2OS_ars_ΔEDC3_bp	ABCG1	TRUE	U-2 OS	arsenite	bp	3	bp	3	low
U2OS_virus_G3BP1_bp_wt	ABCG1	TRUE	U-2 OS	virus	bp	3	bp	3	low
U2OS_ars_G3BP1_pl_wt	ABHD10	TRUE	U-2 OS	arsenite	pl	5	pl_fanci	6	medium
HeLa_ars_G3BP1_fanci_wt	ABHD10	TRUE	HeLa	arsenite	fanci	5	pl_fanci	6	medium
HeLa_heat_G3BP1_fanci_wt	ABHD10	TRUE	HeLa	heatshock	fanci	5	pl_fanci	6	medium
HeLa_osm_G3BP1_fanci_wt	ABHD10	TRUE	HeLa	osmosis	fanci	5	pl_fanci	6	medium
HeLa_UV_G3BP1_fanci_wt	ABHD10	TRUE	HeLa	UV-light	fanci	5	pl_fanci	6	medium
U251_ars_G3BP1_bp_wt	ABHD12	TRUE	U251	arsenite	bp	1	bp	1	low
HeLa_ars_G3BP1_fanci_wt	ABHD13	TRUE	HeLa	arsenite	fanci	4	fanci	4	medium
HeLa_heat_G3BP1_fanci_wt	ABHD13	TRUE	HeLa	heatshock	fanci	4	fanci	4	medium
HeLa_osm_G3BP1_fanci_wt	ABHD13	TRUE	HeLa	osmosis	fanci	4	fanci	4	medium
HeLa_UV_G3BP1_fanci_wt	ABHD13	TRUE	HeLa	UV-light	fanci	4	fanci	4	medium
U2OS_ars_PABPC1_bp_wt	ABHD15	TRUE	U-2 OS	arsenite	bp	6	bp_fanci	7	medium
U2OS_virus_G3BP1_bp_wt	ABHD15	TRUE	U-2 OS	virus	bp	6	bp_fanci	7	medium
HeLa_ars_G3BP1_fanci_wt	ABHD15	TRUE	HeLa	arsenite	fanci	6	bp_fanci	7	medium
HeLa_heat_G3BP1_fanci_wt	ABHD15	TRUE	HeLa	heatshock	fanci	6	bp_fanci	7	medium
HeLa_osm_G3BP1_fanci_wt	ABHD15	TRUE	HeLa	osmosis	fanci	6	bp_fanci	7	medium
SKNBE_ars_G3BP1_bp_FUS	ABHD15	TRUE	SK-N-BE	arsenite	bp	6	bp_fanci	7	medium
Tcell_stim_G3BP1_bp_wt	ABHD17A	TRUE	T cell	stimulation	bp	2	bp_pl	3	low
HEK293T_heat_elF4A1_pl_wt	ABHD17A	TRUE	HEK293T	heatshock	pl	2	bp_pl	3	low
HEK293T_sorb_G3BP1_pl_wt	ABHD17B	TRUE	HEK293T	sorbitol	pl	6	pl_fanci	7	medium
U2OS_ars_G3BP1_pl_wt	ABHD17B	TRUE	U-2 OS	arsenite	pl	6	pl_fanci	7	medium
HeLa_ars_G3BP1_fanci_wt	ABHD17B	TRUE	HeLa	arsenite	fanci	6	pl_fanci	7	medium
HeLa_heat_G3BP1_fanci_wt	ABHD17B	TRUE	HeLa	heatshock	fanci	6	pl_fanci	7	medium
HeLa_osm_G3BP1_fanci_wt	ABHD17B	TRUE	HeLa	osmosis	fanci	6	pl_fanci	7	medium
HeLa_UV_G3BP1_fanci_wt	ABHD17B	TRUE	HeLa	UV-light	fanci	6	pl_fanci	7	medium
U2OS_ars_G3BP1_pl_wt	ABHD17C	TRUE	U-2 OS	arsenite	pl	8	bp_pl_fanci	9	medium
U2OS_ars_ΔEDC3_bp	ABHD17C	TRUE	U-2 OS	arsenite	bp	8	bp_pl_fanci	9	medium
U2OS_ars_G3BP1_bp_wt	ABHD17C	TRUE	U-2 OS	arsenite	bp	8	bp_pl_fanci	9	medium
U2OS_virus_G3BP1_bp_wt	ABHD17C	TRUE	U-2 OS	virus	bp	8	bp_pl_fanci	9	medium
HeLa_ars_G3BP1_fanci_wt	ABHD17C	TRUE	HeLa	arsenite	fanci	8	bp_pl_fanci	9	medium
HeLa_heat_G3BP1_fanci_wt	ABHD17C	TRUE	HeLa	heatshock	fanci	8	bp_pl_fanci	9	medium
HeLa_osm_G3BP1_fanci_wt	ABHD17C	TRUE	HeLa	osmosis	fanci	8	bp_pl_fanci	9	medium
SKNBE_ars_G3BP1_bp_FUS	ABHD17C	TRUE	SK-N-BE	arsenite	bp	8	bp_pl_fanci	9	medium
Tcell_stim_G3BP1_bp_wt	ABHD18	TRUE	T cell	stimulation	bp	1	bp	1	low
Tcell_stim_G3BP1_bp_wt	ABHD2	TRUE	T cell	stimulation	bp	3	bp_fanci	4	medium
HeLa_heat_G3BP1_fanci_wt	ABHD2	TRUE	HeLa	heatshock	fanci	3	bp_fanci	4	medium
HeLa_osm_G3BP1_fanci_wt	ABHD2	TRUE	HeLa	osmosis	fanci	3	bp_fanci	4	medium
HeLa_UV_G3BP1_fanci_wt	ABHD3	TRUE	HeLa	UV-light	fanci	1	fanci	1	low
HeLa_ars_G3BP1_fanci_wt	ABHD5	TRUE	HeLa	arsenite	fanci	4	fanci	4	medium
HeLa_heat_G3BP1_fanci_wt	ABHD5	TRUE	HeLa	heatshock	fanci	4	fanci	4	medium
HeLa_osm_G3BP1_fanci_wt	ABHD5	TRUE	HeLa	osmosis	fanci	4	fanci	4	medium
HeLa_UV_G3BP1_fanci_wt	ABHD5	TRUE	HeLa	UV-light	fanci	4	fanci	4	medium
HeLa_heat_G3BP1_fanci_wt	ABHD6	TRUE	HeLa	heatshock	fanci	1	fanci	1	low
HeLa_osm_G3BP1_fanci_wt	ABHD8	TRUE	HeLa	osmosis	fanci	1	fanci	1	low
Tcell_stim_G3BP1_bp_wt	ABI1	TRUE	T cell	stimulation	bp	3	bp_fanci	4	medium
PC3_ars_G3BP1_pl_wt	ABI1	TRUE	PC3	arsenite	bp	3	bp_fanci	4	medium
HeLa_UV_G3BP1_fanci_wt	ABI1	TRUE	HeLa	UV-light	fanci	3	bp_fanci	4	medium
HeLa_ars_G3BP1_fanci_wt	ABI2	TRUE	HeLa	arsenite	fanci	4	fanci	4	medium
HeLa_heat_G3BP1_fanci_wt	ABI2	TRUE	HeLa	heatshock	fanci	4	fanci	4	medium
HeLa_osm_G3BP1_fanci_wt	ABI2	TRUE	HeLa	osmosis	fanci	4	fanci	4	medium
HeLa_UV_G3BP1_fanci_wt	ABI2	TRUE	HeLa	UV-light	fanci	4	fanci	4	medium
HeLa_ars_G3BP1_fanci_wt	ABITRAM	TRUE	HeLa	arsenite	fanci	3	fanci	3	low
HeLa_osm_G3BP1_fanci_wt	ABITRAM	TRUE	HeLa	osmosis	fanci	3	fanci	3	low
HeLa_UV_G3BP1_fanci_wt	ABITRAM	TRUE	HeLa	UV-light	fanci	3	fanci	3	low
Tcell_stim_G3BP1_bp_wt	ABL1	TRUE	T cell	stimulation	bp	11	bp_fanci	12	high
U2OS_ars_ΔEDC3_bp	ABL1	TRUE	U-2 OS	arsenite	bp	11	bp_fanci	12	high
U2OS_ars_G3BP1_bp_wt	ABL1	TRUE	U-2 OS	arsenite	bp	11	bp_fanci	12	high
U2OS_ars_PABPC1_bp_wt	ABL1	TRUE	U-2 OS	arsenite	bp	11	bp_fanci	12	high
U2OS_sorb_PABPC1_bp_wt	ABL1	TRUE	U-2 OS	sorbitol	bp	11	bp_fanci	12	high
U2OS_sorb_PABPC1_bp_G3BPko	ABL1	TRUE	U-2 OS	sorbitol	bp	11	bp_fanci	12	high
U2OS_virus_G3BP1_bp_wt	ABL1	TRUE	U-2 OS	virus	bp	11	bp_fanci	12	high
U251_ars_G3BP1_bp_wt	ABL1	TRUE	U251	arsenite	bp	11	bp_fanci	12	high
HeLa_heat_G3BP1_fanci_wt	ABL1	TRUE	HeLa	heatshock	fanci	11	bp_fanci	12	high
SKNBE_ars_G3BP1_bp_FUS	ABL1	TRUE	SK-N-BE	arsenite	bp	11	bp_fanci	12	high
SMMC_ars_G3BP1_bp_wt	ABL1	TRUE	SMMC-7721	arsenite	bp	11	bp_fanci	12	high
Tcell_stim_G3BP1_bp_wt	ABL2	TRUE	T cell	stimulation	bp	11	bp_fanci	12	high
U2OS_ars_G3BP1_bp_wt	ABL2	TRUE	U-2 OS	arsenite	bp	11	bp_fanci	12	high
U2OS_ars_PABPC1_bp_wt	ABL2	TRUE	U-2 OS	arsenite	bp	11	bp_fanci	12	high
U2OS_virus_G3BP1_bp_wt	ABL2	TRUE	U-2 OS	virus	bp	11	bp_fanci	12	high
HeLa_ars_G3BP1_bp_wt	ABL2	TRUE	HeLa	arsenite	bp	11	bp_fanci	12	high
HeLa_ars_G3BP1_fanci_wt	ABL2	TRUE	HeLa	arsenite	fanci	11	bp_fanci	12	high
HeLa_heat_G3BP1_fanci_wt	ABL2	TRUE	HeLa	heatshock	fanci	11	bp_fanci	12	high
HeLa_osm_G3BP1_fanci_wt	ABL2	TRUE	HeLa	osmosis	fanci	11	bp_fanci	12	high
HeLa_UV_G3BP1_fanci_wt	ABL2	TRUE	HeLa	UV-light	fanci	11	bp_fanci	12	high
SKNBE_ars_G3BP1_bp_FUS	ABL2	TRUE	SK-N-BE	arsenite	bp	11	bp_fanci	12	high
SKNBE_ars_G3BP1_bp_FUS-P525L	ABL2	TRUE	SK-N-BE	arsenite	bp	11	bp_fanci	12	high
U2OS_ars_ΔEDC3_bp	ABLIM1	TRUE	U-2 OS	arsenite	bp	8	bp_fanci	9	medium
U2OS_ars_G3BP1_bp_wt	ABLIM1	TRUE	U-2 OS	arsenite	bp	8	bp_fanci	9	medium
U2OS_sorb_PABPC1_bp_wt	ABLIM1	TRUE	U-2 OS	sorbitol	bp	8	bp_fanci	9	medium
U2OS_sorb_PABPC1_bp_G3BPko	ABLIM1	TRUE	U-2 OS	sorbitol	bp	8	bp_fanci	9	medium
U251_ars_G3BP1_bp_wt	ABLIM1	TRUE	U251	arsenite	bp	8	bp_fanci	9	medium
HeLa_ars_G3BP1_fanci_wt	ABLIM1	TRUE	HeLa	arsenite	fanci	8	bp_fanci	9	medium
HeLa_heat_G3BP1_fanci_wt	ABLIM1	TRUE	HeLa	heatshock	fanci	8	bp_fanci	9	medium
HeLa_osm_G3BP1_fanci_wt	ABLIM1	TRUE	HeLa	osmosis	fanci	8	bp_fanci	9	medium
U251_ars_G3BP1_bp_wt	ABLIM3	TRUE	U251	arsenite	bp	1	bp	1	low
Tcell_stim_G3BP1_bp_wt	ABR	TRUE	T cell	stimulation	bp	2	bp	2	low
SMMC_ars_G3BP1_bp_wt	ABR	TRUE	SMMC-7721	arsenite	bp	2	bp	2	low
PC3_ars_G3BP1_pl_wt	ABRACL	TRUE	PC3	arsenite	bp	1	bp	1	low
HeLa_ars_G3BP1_fanci_wt	ABRAXAS1	TRUE	HeLa	arsenite	fanci	2	fanci	2	low
HeLa_heat_G3BP1_fanci_wt	ABRAXAS1	TRUE	HeLa	heatshock	fanci	2	fanci	2	low
HeLa_ars_G3BP1_fanci_wt	ABRAXAS2	TRUE	HeLa	arsenite	fanci	3	fanci	3	low
HeLa_heat_G3BP1_fanci_wt	ABRAXAS2	TRUE	HeLa	heatshock	fanci	3	fanci	3	low
HeLa_osm_G3BP1_fanci_wt	ABRAXAS2	TRUE	HeLa	osmosis	fanci	3	fanci	3	low
HeLa_ars_G3BP1_fanci_wt	ABT1	TRUE	HeLa	arsenite	fanci	2	fanci	2	low
HeLa_osm_G3BP1_fanci_wt	ABT1	TRUE	HeLa	osmosis	fanci	2	fanci	2	low
U2OS_ars_ΔEDC3_bp	ABTB2	TRUE	U-2 OS	arsenite	bp	3	bp	3	low
SKNBE_ars_G3BP1_bp_FUS	ABTB2	TRUE	SK-N-BE	arsenite	bp	3	bp	3	low
SMMC_ars_G3BP1_bp_wt	ABTB2	TRUE	SMMC-7721	arsenite	bp	3	bp	3	low
Tcell_stim_G3BP1_bp_wt	ABTB3	TRUE	T cell	stimulation	bp	1	bp	1	low
SKNBE_ars_G3BP1_bp_FUS	AC000095.1	FALSE	SK-N-BE	arsenite	bp	1	bp	1	low
Tcell_stim_G3BP1_bp_wt	AC000123.2	FALSE	T cell	stimulation	bp	1	bp	1	low
Tcell_stim_G3BP1_bp_wt	AC000123.3	FALSE	T cell	stimulation	bp	4	bp	4	medium
U2OS_ars_ΔEDC3_bp	AC000123.3	FALSE	U-2 OS	arsenite	bp	4	bp	4	medium
SKNBE_ars_G3BP1_bp_FUS	AC000123.3	FALSE	SK-N-BE	arsenite	bp	4	bp	4	medium
SKNBE_ars_G3BP1_bp_FUS-P525L	AC000123.3	FALSE	SK-N-BE	arsenite	bp	4	bp	4	medium
SKNBE_ars_G3BP1_bp_FUS	AC002044.2	FALSE	SK-N-BE	arsenite	bp	1	bp	1	low
U2OS_sorb_PABPC1_bp_G3BPko	AC002056.3	FALSE	U-2 OS	sorbitol	bp	1	bp	1	low
Tcell_stim_G3BP1_bp_wt	AC002094.4	FALSE	T cell	stimulation	bp	1	bp	1	low
SKNBE_ars_G3BP1_bp_FUS	AC002316.1	FALSE	SK-N-BE	arsenite	bp	2	bp	2	low
SMMC_ars_G3BP1_bp_wt	AC002316.1	FALSE	SMMC-7721	arsenite	bp	2	bp	2	low
SKNBE_ars_G3BP1_bp_FUS-P525L	AC002472.2	FALSE	SK-N-BE	arsenite	bp	1	bp	1	low
SKNBE_ars_G3BP1_bp_FUS	AC002550.2	FALSE	SK-N-BE	arsenite	bp	2	bp	2	low
SKNBE_ars_G3BP1_bp_FUS-P525L	AC002550.2	FALSE	SK-N-BE	arsenite	bp	2	bp	2	low
SKNBE_ars_G3BP1_bp_FUS-P525L	AC004076.2	FALSE	SK-N-BE	arsenite	bp	1	bp	1	low
Tcell_stim_G3BP1_bp_wt	AC004151.1	FALSE	T cell	stimulation	bp	2	bp	2	low
SMMC_ars_G3BP1_bp_wt	AC004151.1	FALSE	SMMC-7721	arsenite	bp	2	bp	2	low
U2OS_ars_PABPC1_bp_wt	AC004447.2	FALSE	U-2 OS	arsenite	bp	1	bp	1	low
SKNBE_ars_G3BP1_bp_FUS	AC004449.1	FALSE	SK-N-BE	arsenite	bp	1	bp	1	low
U2OS_ars_G3BP1_bp_wt	AC004449.6	FALSE	U-2 OS	arsenite	bp	1	bp	1	low
U2OS_ars_ΔEDC3_bp	AC004453.2	FALSE	U-2 OS	arsenite	bp	1	bp	1	low
SKNBE_ars_G3BP1_bp_FUS	AC004466.2	FALSE	SK-N-BE	arsenite	bp	1	bp	1	low
Tcell_stim_G3BP1_bp_wt	AC004475.1	FALSE	T cell	stimulation	bp	1	bp	1	low
U2OS_ars_ΔEDC3_bp	AC004656.1	FALSE	U-2 OS	arsenite	bp	1	bp	1	low
SKNBE_ars_G3BP1_bp_FUS	AC004678.2	FALSE	SK-N-BE	arsenite	bp	2	bp	2	low
SKNBE_ars_G3BP1_bp_FUS-P525L	AC004678.2	FALSE	SK-N-BE	arsenite	bp	2	bp	2	low
SMMC_ars_G3BP1_bp_wt	AC004706.3	FALSE	SMMC-7721	arsenite	bp	1	bp	1	low
SKNBE_ars_G3BP1_bp_FUS	AC004801.6	FALSE	SK-N-BE	arsenite	bp	2	bp	2	low
SKNBE_ars_G3BP1_bp_FUS-P525L	AC004801.6	FALSE	SK-N-BE	arsenite	bp	2	bp	2	low
U2OS_ars_G3BP1_bp_wt	AC004840.9	FALSE	U-2 OS	arsenite	bp	1	bp	1	low
Tcell_stim_G3BP1_bp_wt	AC004847.1	FALSE	T cell	stimulation	bp	1	bp	1	low
SKNBE_ars_G3BP1_bp_FUS	AC004877.1	FALSE	SK-N-BE	arsenite	bp	1	bp	1	low
U2OS_ars_PABPC1_bp_wt	AC004893.11	FALSE	U-2 OS	arsenite	bp	1	bp	1	low
SKNBE_ars_G3BP1_bp_FUS	AC004918.5	FALSE	SK-N-BE	arsenite	bp	1	bp	1	low
U2OS_ars_G3BP1_bp_wt	AC004941.5	FALSE	U-2 OS	arsenite	bp	3	bp	3	low
U2OS_ars_PABPC1_bp_wt	AC004941.5	FALSE	U-2 OS	arsenite	bp	3	bp	3	low
U2OS_sorb_PABPC1_bp_wt	AC004941.5	FALSE	U-2 OS	sorbitol	bp	3	bp	3	low
SKNBE_ars_G3BP1_bp_FUS	AC004951.1	FALSE	SK-N-BE	arsenite	bp	2	bp	2	low
SMMC_ars_G3BP1_bp_wt	AC004951.1	FALSE	SMMC-7721	arsenite	bp	2	bp	2	low
U2OS_sorb_PABPC1_bp_G3BPko	AC004987.9	FALSE	U-2 OS	sorbitol	bp	1	bp	1	low
SKNBE_ars_G3BP1_bp_FUS	AC005034.6	FALSE	SK-N-BE	arsenite	bp	2	bp	2	low
SKNBE_ars_G3BP1_bp_FUS-P525L	AC005034.6	FALSE	SK-N-BE	arsenite	bp	2	bp	2	low
SKNBE_ars_G3BP1_bp_FUS	AC005072.1	FALSE	SK-N-BE	arsenite	bp	2	bp	2	low
SKNBE_ars_G3BP1_bp_FUS-P525L	AC005072.1	FALSE	SK-N-BE	arsenite	bp	2	bp	2	low
SMMC_ars_G3BP1_bp_wt	AC005089.1	FALSE	SMMC-7721	arsenite	bp	1	bp	1	low
SKNBE_ars_G3BP1_bp_FUS	AC005197.1	FALSE	SK-N-BE	arsenite	bp	1	bp	1	low
Tcell_stim_G3BP1_bp_wt	AC005224.3	FALSE	T cell	stimulation	bp	3	bp	3	low
SKNBE_ars_G3BP1_bp_FUS	AC005224.3	FALSE	SK-N-BE	arsenite	bp	3	bp	3	low
SKNBE_ars_G3BP1_bp_FUS-P525L	AC005224.3	FALSE	SK-N-BE	arsenite	bp	3	bp	3	low
SKNBE_ars_G3BP1_bp_FUS	AC005225.3	FALSE	SK-N-BE	arsenite	bp	1	bp	1	low
Tcell_stim_G3BP1_bp_wt	AC005261.1	FALSE	T cell	stimulation	bp	2	bp	2	low
HeLa_ars_G3BP1_bp_wt	AC005261.1	FALSE	HeLa	arsenite	bp	2	bp	2	low
Tcell_stim_G3BP1_bp_wt	AC005261.2	FALSE	T cell	stimulation	bp	4	bp	4	medium
SKNBE_ars_G3BP1_bp_FUS	AC005261.2	FALSE	SK-N-BE	arsenite	bp	4	bp	4	medium
SKNBE_ars_G3BP1_bp_FUS-P525L	AC005261.2	FALSE	SK-N-BE	arsenite	bp	4	bp	4	medium
SMMC_ars_G3BP1_bp_wt	AC005261.2	FALSE	SMMC-7721	arsenite	bp	4	bp	4	medium
Tcell_stim_G3BP1_bp_wt	AC005261.6	FALSE	T cell	stimulation	bp	1	bp	1	low
SKNBE_ars_G3BP1_bp_FUS	AC005306.1	FALSE	SK-N-BE	arsenite	bp	1	bp	1	low
SKNBE_ars_G3BP1_bp_FUS	AC005329.1	FALSE	SK-N-BE	arsenite	bp	1	bp	1	low
U2OS_ars_G3BP1_bp_wt	AC005329.7	FALSE	U-2 OS	arsenite	bp	1	bp	1	low
U2OS_ars_ΔEDC3_bp	AC005394.2	FALSE	U-2 OS	arsenite	bp	1	bp	1	low
SKNBE_ars_G3BP1_bp_FUS	AC005609.2	FALSE	SK-N-BE	arsenite	bp	1	bp	1	low
SKNBE_ars_G3BP1_bp_FUS	AC005609.5	FALSE	SK-N-BE	arsenite	bp	1	bp	1	low
SKNBE_ars_G3BP1_bp_FUS	AC005670.3	FALSE	SK-N-BE	arsenite	bp	1	bp	1	low
U2OS_ars_ΔEDC3_bp	AC005696.4	FALSE	U-2 OS	arsenite	bp	2	bp	2	low
SKNBE_ars_G3BP1_bp_FUS	AC005696.4	FALSE	SK-N-BE	arsenite	bp	2	bp	2	low
SKNBE_ars_G3BP1_bp_FUS	AC005753.1	FALSE	SK-N-BE	arsenite	bp	2	bp	2	low
SKNBE_ars_G3BP1_bp_FUS-P525L	AC005753.1	FALSE	SK-N-BE	arsenite	bp	2	bp	2	low
SKNBE_ars_G3BP1_bp_FUS	AC005753.3	FALSE	SK-N-BE	arsenite	bp	2	bp	2	low
SKNBE_ars_G3BP1_bp_FUS-P525L	AC005753.3	FALSE	SK-N-BE	arsenite	bp	2	bp	2	low
U2OS_ars_ΔEDC3_bp	AC005776.2	FALSE	U-2 OS	arsenite	bp	1	bp	1	low
SMMC_ars_G3BP1_bp_wt	AC005786.1	FALSE	SMMC-7721	arsenite	bp	1	bp	1	low
SKNBE_ars_G3BP1_bp_FUS	AC005786.3	FALSE	SK-N-BE	arsenite	bp	1	bp	1	low
SKNBE_ars_G3BP1_bp_FUS	AC005828.4	FALSE	SK-N-BE	arsenite	bp	1	bp	1	low
Tcell_stim_G3BP1_bp_wt	AC005831.1	FALSE	T cell	stimulation	bp	2	bp	2	low
U2OS_ars_ΔEDC3_bp	AC005831.1	FALSE	U-2 OS	arsenite	bp	2	bp	2	low
U2OS_ars_ΔEDC3_bp	AC005865.1	FALSE	U-2 OS	arsenite	bp	1	bp	1	low
Tcell_stim_G3BP1_bp_wt	AC005943.1	FALSE	T cell	stimulation	bp	1	bp	1	low
U2OS_ars_G3BP1_bp_wt	AC005943.5	FALSE	U-2 OS	arsenite	bp	1	bp	1	low
SMMC_ars_G3BP1_bp_wt	AC005944.1	FALSE	SMMC-7721	arsenite	bp	1	bp	1	low
SMMC_ars_G3BP1_bp_wt	AC006001.2	FALSE	SMMC-7721	arsenite	bp	1	bp	1	low
SMMC_ars_G3BP1_bp_wt	AC006064.2	FALSE	SMMC-7721	arsenite	bp	1	bp	1	low
Tcell_stim_G3BP1_bp_wt	AC006111.1	FALSE	T cell	stimulation	bp	1	bp	1	low
SKNBE_ars_G3BP1_bp_FUS-P525L	AC006111.2	FALSE	SK-N-BE	arsenite	bp	1	bp	1	low
SKNBE_ars_G3BP1_bp_FUS-P525L	AC006116.12	FALSE	SK-N-BE	arsenite	bp	1	bp	1	low
SMMC_ars_G3BP1_bp_wt	AC006128.1	FALSE	SMMC-7721	arsenite	bp	1	bp	1	low
SMMC_ars_G3BP1_bp_wt	AC006210.2	FALSE	SMMC-7721	arsenite	bp	1	bp	1	low
SKNBE_ars_G3BP1_bp_FUS-P525L	AC006213.3	FALSE	SK-N-BE	arsenite	bp	1	bp	1	low
SKNBE_ars_G3BP1_bp_FUS-P525L	AC006213.4	FALSE	SK-N-BE	arsenite	bp	1	bp	1	low
U2OS_ars_ΔEDC3_bp	AC006504.1	FALSE	U-2 OS	arsenite	bp	1	bp	1	low
SKNBE_ars_G3BP1_bp_FUS	AC006504.7	FALSE	SK-N-BE	arsenite	bp	2	bp	2	low
SKNBE_ars_G3BP1_bp_FUS-P525L	AC006504.7	FALSE	SK-N-BE	arsenite	bp	2	bp	2	low
Tcell_stim_G3BP1_bp_wt	AC006538.1	FALSE	T cell	stimulation	bp	5	bp	5	medium
U2OS_ars_G3BP1_bp_wt	AC006538.1	FALSE	U-2 OS	arsenite	bp	5	bp	5	medium
U2OS_ars_PABPC1_bp_wt	AC006538.1	FALSE	U-2 OS	arsenite	bp	5	bp	5	medium
U2OS_sorb_G3BP1_bp_wt	AC006538.1	FALSE	U-2 OS	sorbitol	bp	5	bp	5	medium
SKNBE_ars_G3BP1_bp_FUS	AC006538.1	FALSE	SK-N-BE	arsenite	bp	5	bp	5	medium
SKNBE_ars_G3BP1_bp_FUS-P525L	AC006538.3	FALSE	SK-N-BE	arsenite	bp	1	bp	1	low
U2OS_ars_ΔEDC3_bp	AC006946.2	FALSE	U-2 OS	arsenite	bp	1	bp	1	low
SKNBE_ars_G3BP1_bp_FUS	AC006978.1	FALSE	SK-N-BE	arsenite	bp	3	bp	3	low
SKNBE_ars_G3BP1_bp_FUS-P525L	AC006978.1	FALSE	SK-N-BE	arsenite	bp	3	bp	3	low
SMMC_ars_G3BP1_bp_wt	AC006978.1	FALSE	SMMC-7721	arsenite	bp	3	bp	3	low
Tcell_stim_G3BP1_bp_wt	AC007068.1	FALSE	T cell	stimulation	bp	1	bp	1	low
SMMC_ars_G3BP1_bp_wt	AC007182.2	FALSE	SMMC-7721	arsenite	bp	1	bp	1	low
SMMC_ars_G3BP1_bp_wt	AC007191.1	FALSE	SMMC-7721	arsenite	bp	1	bp	1	low
Tcell_stim_G3BP1_bp_wt	AC007192.2	FALSE	T cell	stimulation	bp	1	bp	1	low
SMMC_ars_G3BP1_bp_wt	AC007238.1	FALSE	SMMC-7721	arsenite	bp	1	bp	1	low
SKNBE_ars_G3BP1_bp_FUS	AC007292.1	FALSE	SK-N-BE	arsenite	bp	1	bp	1	low
Tcell_stim_G3BP1_bp_wt	AC007326.5	FALSE	T cell	stimulation	bp	1	bp	1	low
Tcell_stim_G3BP1_bp_wt	AC007406.5	FALSE	T cell	stimulation	bp	3	bp	3	low
SKNBE_ars_G3BP1_bp_FUS	AC007406.5	FALSE	SK-N-BE	arsenite	bp	3	bp	3	low
SKNBE_ars_G3BP1_bp_FUS-P525L	AC007406.5	FALSE	SK-N-BE	arsenite	bp	3	bp	3	low
HeLa_ars_G3BP1_bp_wt	AC007620.2	FALSE	HeLa	arsenite	bp	1	bp	1	low
U2OS_ars_G3BP1_bp_wt	AC007620.3	FALSE	U-2 OS	arsenite	bp	2	bp	2	low
U2OS_sorb_G3BP1_bp_wt	AC007620.3	FALSE	U-2 OS	sorbitol	bp	2	bp	2	low
SKNBE_ars_G3BP1_bp_FUS	AC007637.1	FALSE	SK-N-BE	arsenite	bp	1	bp	1	low
SKNBE_ars_G3BP1_bp_FUS-P525L	AC007842.1	FALSE	SK-N-BE	arsenite	bp	2	bp	2	low
SMMC_ars_G3BP1_bp_wt	AC007842.1	FALSE	SMMC-7721	arsenite	bp	2	bp	2	low
SKNBE_ars_G3BP1_bp_FUS-P525L	AC007996.1	FALSE	SK-N-BE	arsenite	bp	1	bp	1	low
SMMC_ars_G3BP1_bp_wt	AC008038.1	FALSE	SMMC-7721	arsenite	bp	1	bp	1	low
SKNBE_ars_G3BP1_bp_FUS	AC008147.4	FALSE	SK-N-BE	arsenite	bp	1	bp	1	low
SMMC_ars_G3BP1_bp_wt	AC008393.2	FALSE	SMMC-7721	arsenite	bp	1	bp	1	low
U2OS_ars_ΔEDC3_bp	AC008443.2	FALSE	U-2 OS	arsenite	bp	1	bp	1	low
SKNBE_ars_G3BP1_bp_FUS	AC008507.1	FALSE	SK-N-BE	arsenite	bp	2	bp	2	low
SKNBE_ars_G3BP1_bp_FUS-P525L	AC008507.1	FALSE	SK-N-BE	arsenite	bp	2	bp	2	low
U2OS_ars_ΔEDC3_bp	AC008507.2	FALSE	U-2 OS	arsenite	bp	1	bp	1	low
Tcell_stim_G3BP1_bp_wt	AC008554.1	FALSE	T cell	stimulation	bp	1	bp	1	low
SKNBE_ars_G3BP1_bp_FUS	AC008555.1	FALSE	SK-N-BE	arsenite	bp	2	bp	2	low
SKNBE_ars_G3BP1_bp_FUS-P525L	AC008555.1	FALSE	SK-N-BE	arsenite	bp	2	bp	2	low
Tcell_stim_G3BP1_bp_wt	AC008555.4	FALSE	T cell	stimulation	bp	1	bp	1	low
SKNBE_ars_G3BP1_bp_FUS	AC008555.7	FALSE	SK-N-BE	arsenite	bp	2	bp	2	low
SKNBE_ars_G3BP1_bp_FUS-P525L	AC008555.7	FALSE	SK-N-BE	arsenite	bp	2	bp	2	low
SMMC_ars_G3BP1_bp_wt	AC008581.1	FALSE	SMMC-7721	arsenite	bp	1	bp	1	low
Tcell_stim_G3BP1_bp_wt	AC008755.1	FALSE	T cell	stimulation	bp	1	bp	1	low
Tcell_stim_G3BP1_bp_wt	AC008758.5	FALSE	T cell	stimulation	bp	1	bp	1	low
SMMC_ars_G3BP1_bp_wt	AC008764.10	FALSE	SMMC-7721	arsenite	bp	1	bp	1	low
SKNBE_ars_G3BP1_bp_FUS-P525L	AC008770.3	FALSE	SK-N-BE	arsenite	bp	1	bp	1	low
HeLa_ars_G3BP1_bp_wt	AC008870.1	FALSE	HeLa	arsenite	bp	1	bp	1	low
Tcell_stim_G3BP1_bp_wt	AC008878.3	FALSE	T cell	stimulation	bp	1	bp	1	low
SKNBE_ars_G3BP1_bp_FUS	AC008895.1	FALSE	SK-N-BE	arsenite	bp	1	bp	1	low
SKNBE_ars_G3BP1_bp_FUS-P525L	AC008897.3	FALSE	SK-N-BE	arsenite	bp	1	bp	1	low
Tcell_stim_G3BP1_bp_wt	AC008977.1	FALSE	T cell	stimulation	bp	1	bp	1	low
SMMC_ars_G3BP1_bp_wt	AC008982.2	FALSE	SMMC-7721	arsenite	bp	1	bp	1	low
SKNBE_ars_G3BP1_bp_FUS	AC009041.3	FALSE	SK-N-BE	arsenite	bp	2	bp	2	low
SKNBE_ars_G3BP1_bp_FUS-P525L	AC009041.3	FALSE	SK-N-BE	arsenite	bp	2	bp	2	low
Tcell_stim_G3BP1_bp_wt	AC009041.4	FALSE	T cell	stimulation	bp	1	bp	1	low
SKNBE_ars_G3BP1_bp_FUS	AC009065.2	FALSE	SK-N-BE	arsenite	bp	1	bp	1	low
U2OS_ars_ΔEDC3_bp	AC009078.3	FALSE	U-2 OS	arsenite	bp	2	bp	2	low
SKNBE_ars_G3BP1_bp_FUS	AC009078.3	FALSE	SK-N-BE	arsenite	bp	2	bp	2	low
U2OS_ars_ΔEDC3_bp	AC009086.3	FALSE	U-2 OS	arsenite	bp	1	bp	1	low
SKNBE_ars_G3BP1_bp_FUS-P525L	AC009102.1	FALSE	SK-N-BE	arsenite	bp	1	bp	1	low
SKNBE_ars_G3BP1_bp_FUS	AC009102.3	FALSE	SK-N-BE	arsenite	bp	1	bp	1	low
SMMC_ars_G3BP1_bp_wt	AC009133.1	FALSE	SMMC-7721	arsenite	bp	1	bp	1	low
U2OS_ars_ΔEDC3_bp	AC009237.3	FALSE	U-2 OS	arsenite	bp	1	bp	1	low
U2OS_ars_G3BP1_bp_wt	AC009237.8	FALSE	U-2 OS	arsenite	bp	2	bp	2	low
U2OS_ars_PABPC1_bp_wt	AC009237.8	FALSE	U-2 OS	arsenite	bp	2	bp	2	low
SMMC_ars_G3BP1_bp_wt	AC009245.1	FALSE	SMMC-7721	arsenite	bp	1	bp	1	low
U2OS_sorb_G3BP1_bp_wt	AC009302.2	FALSE	U-2 OS	sorbitol	bp	1	bp	1	low
SKNBE_ars_G3BP1_bp_FUS-P525L	AC009318.2	FALSE	SK-N-BE	arsenite	bp	1	bp	1	low
SKNBE_ars_G3BP1_bp_FUS-P525L	AC009318.3	FALSE	SK-N-BE	arsenite	bp	1	bp	1	low
SMMC_ars_G3BP1_bp_wt	AC009487.2	FALSE	SMMC-7721	arsenite	bp	1	bp	1	low
U2OS_ars_ΔEDC3_bp	AC009533.1	FALSE	U-2 OS	arsenite	bp	2	bp	2	low
SMMC_ars_G3BP1_bp_wt	AC009533.1	FALSE	SMMC-7721	arsenite	bp	2	bp	2	low
SMMC_ars_G3BP1_bp_wt	AC009779.3	FALSE	SMMC-7721	arsenite	bp	1	bp	1	low
SKNBE_ars_G3BP1_bp_FUS	AC009812.4	FALSE	SK-N-BE	arsenite	bp	2	bp	2	low
SKNBE_ars_G3BP1_bp_FUS-P525L	AC009812.4	FALSE	SK-N-BE	arsenite	bp	2	bp	2	low
SKNBE_ars_G3BP1_bp_FUS-P525L	AC009948.2	FALSE	SK-N-BE	arsenite	bp	1	bp	1	low
U2OS_ars_ΔEDC3_bp	AC010186.3	FALSE	U-2 OS	arsenite	bp	1	bp	1	low
SKNBE_ars_G3BP1_bp_FUS-P525L	AC010326.4	FALSE	SK-N-BE	arsenite	bp	1	bp	1	low
SKNBE_ars_G3BP1_bp_FUS-P525L	AC010326.5	FALSE	SK-N-BE	arsenite	bp	1	bp	1	low
SKNBE_ars_G3BP1_bp_FUS	AC010327.6	FALSE	SK-N-BE	arsenite	bp	1	bp	1	low
SMMC_ars_G3BP1_bp_wt	AC010327.7	FALSE	SMMC-7721	arsenite	bp	1	bp	1	low
SKNBE_ars_G3BP1_bp_FUS-P525L	AC010332.1	FALSE	SK-N-BE	arsenite	bp	1	bp	1	low
Tcell_stim_G3BP1_bp_wt	AC010522.1	FALSE	T cell	stimulation	bp	1	bp	1	low
SKNBE_ars_G3BP1_bp_FUS	AC010536.1	FALSE	SK-N-BE	arsenite	bp	2	bp	2	low
SKNBE_ars_G3BP1_bp_FUS-P525L	AC010536.1	FALSE	SK-N-BE	arsenite	bp	2	bp	2	low
SKNBE_ars_G3BP1_bp_FUS	AC010536.3	FALSE	SK-N-BE	arsenite	bp	1	bp	1	low
SKNBE_ars_G3BP1_bp_FUS	AC010615.1	FALSE	SK-N-BE	arsenite	bp	2	bp	2	low
SKNBE_ars_G3BP1_bp_FUS-P525L	AC010615.1	FALSE	SK-N-BE	arsenite	bp	2	bp	2	low
Tcell_stim_G3BP1_bp_wt	AC010733.1	FALSE	T cell	stimulation	bp	1	bp	1	low
Tcell_stim_G3BP1_bp_wt	AC010733.2	FALSE	T cell	stimulation	bp	1	bp	1	low
SKNBE_ars_G3BP1_bp_FUS-P525L	AC010809.2	FALSE	SK-N-BE	arsenite	bp	1	bp	1	low
Tcell_stim_G3BP1_bp_wt	AC010834.1	FALSE	T cell	stimulation	bp	1	bp	1	low
Tcell_stim_G3BP1_bp_wt	AC010834.3	FALSE	T cell	stimulation	bp	1	bp	1	low
Tcell_stim_G3BP1_bp_wt	AC011346.1	FALSE	T cell	stimulation	bp	1	bp	1	low
SMMC_ars_G3BP1_bp_wt	AC011446.2	FALSE	SMMC-7721	arsenite	bp	1	bp	1	low
SMMC_ars_G3BP1_bp_wt	AC011450.1	FALSE	SMMC-7721	arsenite	bp	1	bp	1	low
SKNBE_ars_G3BP1_bp_FUS	AC011462.4	FALSE	SK-N-BE	arsenite	bp	1	bp	1	low
SKNBE_ars_G3BP1_bp_FUS	AC011468.1	FALSE	SK-N-BE	arsenite	bp	2	bp	2	low
SKNBE_ars_G3BP1_bp_FUS-P525L	AC011468.1	FALSE	SK-N-BE	arsenite	bp	2	bp	2	low
SKNBE_ars_G3BP1_bp_FUS-P525L	AC011476.3	FALSE	SK-N-BE	arsenite	bp	1	bp	1	low
SKNBE_ars_G3BP1_bp_FUS-P525L	AC011477.1	FALSE	SK-N-BE	arsenite	bp	1	bp	1	low
SKNBE_ars_G3BP1_bp_FUS-P525L	AC011497.2	FALSE	SK-N-BE	arsenite	bp	1	bp	1	low
SKNBE_ars_G3BP1_bp_FUS	AC011498.2	FALSE	SK-N-BE	arsenite	bp	1	bp	1	low
SMMC_ars_G3BP1_bp_wt	AC011498.3	FALSE	SMMC-7721	arsenite	bp	1	bp	1	low
SKNBE_ars_G3BP1_bp_FUS	AC011498.7	FALSE	SK-N-BE	arsenite	bp	2	bp	2	low
SMMC_ars_G3BP1_bp_wt	AC011498.7	FALSE	SMMC-7721	arsenite	bp	2	bp	2	low
SKNBE_ars_G3BP1_bp_FUS	AC011504.1	FALSE	SK-N-BE	arsenite	bp	2	bp	2	low
SKNBE_ars_G3BP1_bp_FUS-P525L	AC011504.1	FALSE	SK-N-BE	arsenite	bp	2	bp	2	low
SKNBE_ars_G3BP1_bp_FUS-P525L	AC011939.3	FALSE	SK-N-BE	arsenite	bp	1	bp	1	low
SKNBE_ars_G3BP1_bp_FUS	AC011978.2	FALSE	SK-N-BE	arsenite	bp	2	bp	2	low
SKNBE_ars_G3BP1_bp_FUS-P525L	AC011978.2	FALSE	SK-N-BE	arsenite	bp	2	bp	2	low
SMMC_ars_G3BP1_bp_wt	AC012066.1	FALSE	SMMC-7721	arsenite	bp	1	bp	1	low
Tcell_stim_G3BP1_bp_wt	AC012073.1	FALSE	T cell	stimulation	bp	3	bp	3	low
SKNBE_ars_G3BP1_bp_FUS	AC012073.1	FALSE	SK-N-BE	arsenite	bp	3	bp	3	low
SMMC_ars_G3BP1_bp_wt	AC012073.1	FALSE	SMMC-7721	arsenite	bp	3	bp	3	low
SMMC_ars_G3BP1_bp_wt	AC012085.1	FALSE	SMMC-7721	arsenite	bp	1	bp	1	low
Tcell_stim_G3BP1_bp_wt	AC012184.2	FALSE	T cell	stimulation	bp	1	bp	1	low
SKNBE_ars_G3BP1_bp_FUS	AC012184.4	FALSE	SK-N-BE	arsenite	bp	1	bp	1	low
Tcell_stim_G3BP1_bp_wt	AC012313.1	FALSE	T cell	stimulation	bp	3	bp	3	low
SKNBE_ars_G3BP1_bp_FUS	AC012313.1	FALSE	SK-N-BE	arsenite	bp	3	bp	3	low
SMMC_ars_G3BP1_bp_wt	AC012313.1	FALSE	SMMC-7721	arsenite	bp	3	bp	3	low
SKNBE_ars_G3BP1_bp_FUS	AC012313.2	FALSE	SK-N-BE	arsenite	bp	1	bp	1	low
SKNBE_ars_G3BP1_bp_FUS	AC012313.4	FALSE	SK-N-BE	arsenite	bp	1	bp	1	low
U2OS_ars_ΔEDC3_bp	AC012313.5	FALSE	U-2 OS	arsenite	bp	2	bp	2	low
SKNBE_ars_G3BP1_bp_FUS	AC012313.5	FALSE	SK-N-BE	arsenite	bp	2	bp	2	low
SKNBE_ars_G3BP1_bp_FUS	AC012313.7	FALSE	SK-N-BE	arsenite	bp	1	bp	1	low
U2OS_ars_ΔEDC3_bp	AC012313.8	FALSE	U-2 OS	arsenite	bp	3	bp	3	low
SKNBE_ars_G3BP1_bp_FUS	AC012313.8	FALSE	SK-N-BE	arsenite	bp	3	bp	3	low
SMMC_ars_G3BP1_bp_wt	AC012313.8	FALSE	SMMC-7721	arsenite	bp	3	bp	3	low
Tcell_stim_G3BP1_bp_wt	AC012467.2	FALSE	T cell	stimulation	bp	1	bp	1	low
U2OS_ars_G3BP1_bp_wt	AC012493.1	FALSE	U-2 OS	arsenite	bp	1	bp	1	low
Tcell_stim_G3BP1_bp_wt	AC012510.1	FALSE	T cell	stimulation	bp	4	bp	4	medium
U2OS_ars_ΔEDC3_bp	AC012510.1	FALSE	U-2 OS	arsenite	bp	4	bp	4	medium
SKNBE_ars_G3BP1_bp_FUS	AC012510.1	FALSE	SK-N-BE	arsenite	bp	4	bp	4	medium
SKNBE_ars_G3BP1_bp_FUS-P525L	AC012510.1	FALSE	SK-N-BE	arsenite	bp	4	bp	4	medium
Tcell_stim_G3BP1_bp_wt	AC012513.3	FALSE	T cell	stimulation	bp	3	bp	3	low
SKNBE_ars_G3BP1_bp_FUS	AC012513.3	FALSE	SK-N-BE	arsenite	bp	3	bp	3	low
SKNBE_ars_G3BP1_bp_FUS-P525L	AC012513.3	FALSE	SK-N-BE	arsenite	bp	3	bp	3	low
SMMC_ars_G3BP1_bp_wt	AC012676.5	FALSE	SMMC-7721	arsenite	bp	1	bp	1	low
U2OS_sorb_G3BP1_bp_wt	AC013470.6	FALSE	U-2 OS	sorbitol	bp	1	bp	1	low
SKNBE_ars_G3BP1_bp_FUS	AC013564.1	FALSE	SK-N-BE	arsenite	bp	1	bp	1	low
Tcell_stim_G3BP1_bp_wt	AC015674.1	FALSE	T cell	stimulation	bp	2	bp	2	low
SMMC_ars_G3BP1_bp_wt	AC015674.1	FALSE	SMMC-7721	arsenite	bp	2	bp	2	low
Tcell_stim_G3BP1_bp_wt	AC015688.6	FALSE	T cell	stimulation	bp	1	bp	1	low
SKNBE_ars_G3BP1_bp_FUS	AC015712.6	FALSE	SK-N-BE	arsenite	bp	2	bp	2	low
SMMC_ars_G3BP1_bp_wt	AC015712.6	FALSE	SMMC-7721	arsenite	bp	2	bp	2	low
SKNBE_ars_G3BP1_bp_FUS	AC015813.6	FALSE	SK-N-BE	arsenite	bp	1	bp	1	low
SKNBE_ars_G3BP1_bp_FUS	AC015849.5	FALSE	SK-N-BE	arsenite	bp	1	bp	1	low
SKNBE_ars_G3BP1_bp_FUS-P525L	AC015883.1	FALSE	SK-N-BE	arsenite	bp	1	bp	1	low
SKNBE_ars_G3BP1_bp_FUS	AC015909.5	FALSE	SK-N-BE	arsenite	bp	1	bp	1	low
Tcell_stim_G3BP1_bp_wt	AC015911.3	FALSE	T cell	stimulation	bp	1	bp	1	low
Tcell_stim_G3BP1_bp_wt	AC015911.7	FALSE	T cell	stimulation	bp	1	bp	1	low
Tcell_stim_G3BP1_bp_wt	AC015911.8	FALSE	T cell	stimulation	bp	1	bp	1	low
HeLa_ars_G3BP1_bp_wt	AC015922.2	FALSE	HeLa	arsenite	bp	1	bp	1	low
SKNBE_ars_G3BP1_bp_FUS-P525L	AC015922.3	FALSE	SK-N-BE	arsenite	bp	1	bp	1	low
SMMC_ars_G3BP1_bp_wt	AC016027.3	FALSE	SMMC-7721	arsenite	bp	1	bp	1	low
SKNBE_ars_G3BP1_bp_FUS	AC016394.4	FALSE	SK-N-BE	arsenite	bp	2	bp	2	low
SKNBE_ars_G3BP1_bp_FUS-P525L	AC016394.4	FALSE	SK-N-BE	arsenite	bp	2	bp	2	low
SKNBE_ars_G3BP1_bp_FUS-P525L	AC016542.2	FALSE	SK-N-BE	arsenite	bp	1	bp	1	low
SKNBE_ars_G3BP1_bp_FUS	AC016586.1	FALSE	SK-N-BE	arsenite	bp	1	bp	1	low
SKNBE_ars_G3BP1_bp_FUS	AC016590.4	FALSE	SK-N-BE	arsenite	bp	1	bp	1	low
SMMC_ars_G3BP1_bp_wt	AC016745.1	FALSE	SMMC-7721	arsenite	bp	1	bp	1	low
Tcell_stim_G3BP1_bp_wt	AC016821.1	FALSE	T cell	stimulation	bp	1	bp	1	low
Tcell_stim_G3BP1_bp_wt	AC016831.1	FALSE	T cell	stimulation	bp	1	bp	1	low
SKNBE_ars_G3BP1_bp_FUS-P525L	AC016959.1	FALSE	SK-N-BE	arsenite	bp	1	bp	1	low
Tcell_stim_G3BP1_bp_wt	AC017099.1	FALSE	T cell	stimulation	bp	1	bp	1	low
SMMC_ars_G3BP1_bp_wt	AC018553.1	FALSE	SMMC-7721	arsenite	bp	1	bp	1	low
SMMC_ars_G3BP1_bp_wt	AC018629.1	FALSE	SMMC-7721	arsenite	bp	1	bp	1	low
U2OS_ars_ΔEDC3_bp	AC018638.2	FALSE	U-2 OS	arsenite	bp	2	bp	2	low
SKNBE_ars_G3BP1_bp_FUS	AC018638.2	FALSE	SK-N-BE	arsenite	bp	2	bp	2	low
U2OS_ars_ΔEDC3_bp	AC018638.4	FALSE	U-2 OS	arsenite	bp	3	bp	3	low
SKNBE_ars_G3BP1_bp_FUS	AC018638.4	FALSE	SK-N-BE	arsenite	bp	3	bp	3	low
SKNBE_ars_G3BP1_bp_FUS-P525L	AC018638.4	FALSE	SK-N-BE	arsenite	bp	3	bp	3	low
U2OS_ars_ΔEDC3_bp	AC018638.5	FALSE	U-2 OS	arsenite	bp	3	bp	3	low
SKNBE_ars_G3BP1_bp_FUS	AC018638.5	FALSE	SK-N-BE	arsenite	bp	3	bp	3	low
SKNBE_ars_G3BP1_bp_FUS-P525L	AC018638.5	FALSE	SK-N-BE	arsenite	bp	3	bp	3	low
SKNBE_ars_G3BP1_bp_FUS	AC018690.1	FALSE	SK-N-BE	arsenite	bp	1	bp	1	low
Tcell_stim_G3BP1_bp_wt	AC018797.3	FALSE	T cell	stimulation	bp	1	bp	1	low
SMMC_ars_G3BP1_bp_wt	AC019068.1	FALSE	SMMC-7721	arsenite	bp	1	bp	1	low
SMMC_ars_G3BP1_bp_wt	AC019069.1	FALSE	SMMC-7721	arsenite	bp	1	bp	1	low
U2OS_ars_G3BP1_bp_wt	AC019097.7	FALSE	U-2 OS	arsenite	bp	2	bp	2	low
U2OS_ars_PABPC1_bp_wt	AC019097.7	FALSE	U-2 OS	arsenite	bp	2	bp	2	low
Tcell_stim_G3BP1_bp_wt	AC019322.4	FALSE	T cell	stimulation	bp	1	bp	1	low
U2OS_ars_ΔEDC3_bp	AC020661.1	FALSE	U-2 OS	arsenite	bp	2	bp	2	low
SKNBE_ars_G3BP1_bp_FUS	AC020661.1	FALSE	SK-N-BE	arsenite	bp	2	bp	2	low
SMMC_ars_G3BP1_bp_wt	AC020688.1	FALSE	SMMC-7721	arsenite	bp	1	bp	1	low
SMMC_ars_G3BP1_bp_wt	AC020763.4	FALSE	SMMC-7721	arsenite	bp	1	bp	1	low
SKNBE_ars_G3BP1_bp_FUS	AC020915.2	FALSE	SK-N-BE	arsenite	bp	3	bp	3	low
SKNBE_ars_G3BP1_bp_FUS-P525L	AC020915.2	FALSE	SK-N-BE	arsenite	bp	3	bp	3	low
SMMC_ars_G3BP1_bp_wt	AC020915.2	FALSE	SMMC-7721	arsenite	bp	3	bp	3	low
Tcell_stim_G3BP1_bp_wt	AC020915.5	FALSE	T cell	stimulation	bp	1	bp	1	low
SKNBE_ars_G3BP1_bp_FUS	AC020929.1	FALSE	SK-N-BE	arsenite	bp	1	bp	1	low
SMMC_ars_G3BP1_bp_wt	AC021066.4	FALSE	SMMC-7721	arsenite	bp	1	bp	1	low
SMMC_ars_G3BP1_bp_wt	AC021097.1	FALSE	SMMC-7721	arsenite	bp	1	bp	1	low
SKNBE_ars_G3BP1_bp_FUS	AC021106.1	FALSE	SK-N-BE	arsenite	bp	1	bp	1	low
SKNBE_ars_G3BP1_bp_FUS	AC021188.1	FALSE	SK-N-BE	arsenite	bp	1	bp	1	low
SKNBE_ars_G3BP1_bp_FUS	AC022098.1	FALSE	SK-N-BE	arsenite	bp	1	bp	1	low
SMMC_ars_G3BP1_bp_wt	AC022144.1	FALSE	SMMC-7721	arsenite	bp	1	bp	1	low
SMMC_ars_G3BP1_bp_wt	AC022149.1	FALSE	SMMC-7721	arsenite	bp	1	bp	1	low
Tcell_stim_G3BP1_bp_wt	AC022150.4	FALSE	T cell	stimulation	bp	1	bp	1	low
SKNBE_ars_G3BP1_bp_FUS	AC022306.2	FALSE	SK-N-BE	arsenite	bp	2	bp	2	low
SKNBE_ars_G3BP1_bp_FUS-P525L	AC022306.2	FALSE	SK-N-BE	arsenite	bp	2	bp	2	low
Tcell_stim_G3BP1_bp_wt	AC022415.2	FALSE	T cell	stimulation	bp	1	bp	1	low
SMMC_ars_G3BP1_bp_wt	AC022509.3	FALSE	SMMC-7721	arsenite	bp	1	bp	1	low
Tcell_stim_G3BP1_bp_wt	AC022966.1	FALSE	T cell	stimulation	bp	3	bp	3	low
SKNBE_ars_G3BP1_bp_FUS	AC022966.1	FALSE	SK-N-BE	arsenite	bp	3	bp	3	low
SMMC_ars_G3BP1_bp_wt	AC022966.1	FALSE	SMMC-7721	arsenite	bp	3	bp	3	low
SKNBE_ars_G3BP1_bp_FUS-P525L	AC023024.2	FALSE	SK-N-BE	arsenite	bp	2	bp	2	low
SMMC_ars_G3BP1_bp_wt	AC023024.2	FALSE	SMMC-7721	arsenite	bp	2	bp	2	low
U2OS_ars_ΔEDC3_bp	AC023824.5	FALSE	U-2 OS	arsenite	bp	1	bp	1	low
U2OS_ars_ΔEDC3_bp	AC023824.6	FALSE	U-2 OS	arsenite	bp	1	bp	1	low
U2OS_ars_ΔEDC3_bp	AC023830.3	FALSE	U-2 OS	arsenite	bp	1	bp	1	low
SKNBE_ars_G3BP1_bp_FUS	AC024075.1	FALSE	SK-N-BE	arsenite	bp	2	bp	2	low
SKNBE_ars_G3BP1_bp_FUS-P525L	AC024075.1	FALSE	SK-N-BE	arsenite	bp	2	bp	2	low
SKNBE_ars_G3BP1_bp_FUS-P525L	AC024075.2	FALSE	SK-N-BE	arsenite	bp	1	bp	1	low
Tcell_stim_G3BP1_bp_wt	AC024560.2	FALSE	T cell	stimulation	bp	1	bp	1	low
SKNBE_ars_G3BP1_bp_FUS	AC024940.6	FALSE	SK-N-BE	arsenite	bp	1	bp	1	low
SMMC_ars_G3BP1_bp_wt	AC025171.2	FALSE	SMMC-7721	arsenite	bp	1	bp	1	low
Tcell_stim_G3BP1_bp_wt	AC025442.1	FALSE	T cell	stimulation	bp	1	bp	1	low
Tcell_stim_G3BP1_bp_wt	AC025449.1	FALSE	T cell	stimulation	bp	2	bp	2	low
SMMC_ars_G3BP1_bp_wt	AC025449.1	FALSE	SMMC-7721	arsenite	bp	2	bp	2	low
SMMC_ars_G3BP1_bp_wt	AC025918.1	FALSE	SMMC-7721	arsenite	bp	1	bp	1	low
SMMC_ars_G3BP1_bp_wt	AC026271.1	FALSE	SMMC-7721	arsenite	bp	1	bp	1	low
SKNBE_ars_G3BP1_bp_FUS-P525L	AC026356.1	FALSE	SK-N-BE	arsenite	bp	1	bp	1	low
SKNBE_ars_G3BP1_bp_FUS	AC026356.2	FALSE	SK-N-BE	arsenite	bp	2	bp	2	low
SKNBE_ars_G3BP1_bp_FUS-P525L	AC026356.2	FALSE	SK-N-BE	arsenite	bp	2	bp	2	low
SMMC_ars_G3BP1_bp_wt	AC026362.2	FALSE	SMMC-7721	arsenite	bp	1	bp	1	low
SMMC_ars_G3BP1_bp_wt	AC026462.1	FALSE	SMMC-7721	arsenite	bp	1	bp	1	low
SKNBE_ars_G3BP1_bp_FUS	AC026469.1	FALSE	SK-N-BE	arsenite	bp	1	bp	1	low
Tcell_stim_G3BP1_bp_wt	AC026470.1	FALSE	T cell	stimulation	bp	1	bp	1	low
SKNBE_ars_G3BP1_bp_FUS	AC026740.1	FALSE	SK-N-BE	arsenite	bp	2	bp	2	low
SMMC_ars_G3BP1_bp_wt	AC026740.1	FALSE	SMMC-7721	arsenite	bp	2	bp	2	low
Tcell_stim_G3BP1_bp_wt	AC027237.1	FALSE	T cell	stimulation	bp	1	bp	1	low
SMMC_ars_G3BP1_bp_wt	AC027307.2	FALSE	SMMC-7721	arsenite	bp	1	bp	1	low
SKNBE_ars_G3BP1_bp_FUS	AC027601.4	FALSE	SK-N-BE	arsenite	bp	1	bp	1	low
U2OS_ars_G3BP1_bp_wt	AC027612.1	FALSE	U-2 OS	arsenite	bp	1	bp	1	low
SMMC_ars_G3BP1_bp_wt	AC027682.3	FALSE	SMMC-7721	arsenite	bp	1	bp	1	low
SMMC_ars_G3BP1_bp_wt	AC027796.1	FALSE	SMMC-7721	arsenite	bp	1	bp	1	low
SKNBE_ars_G3BP1_bp_FUS	AC027796.4	FALSE	SK-N-BE	arsenite	bp	2	bp	2	low
SMMC_ars_G3BP1_bp_wt	AC027796.4	FALSE	SMMC-7721	arsenite	bp	2	bp	2	low
SMMC_ars_G3BP1_bp_wt	AC027801.5	FALSE	SMMC-7721	arsenite	bp	1	bp	1	low
SMMC_ars_G3BP1_bp_wt	AC036108.2	FALSE	SMMC-7721	arsenite	bp	1	bp	1	low
Tcell_stim_G3BP1_bp_wt	AC036214.2	FALSE	T cell	stimulation	bp	1	bp	1	low
SKNBE_ars_G3BP1_bp_FUS	AC037459.2	FALSE	SK-N-BE	arsenite	bp	3	bp	3	low
SKNBE_ars_G3BP1_bp_FUS-P525L	AC037459.2	FALSE	SK-N-BE	arsenite	bp	3	bp	3	low
SMMC_ars_G3BP1_bp_wt	AC037459.2	FALSE	SMMC-7721	arsenite	bp	3	bp	3	low
SKNBE_ars_G3BP1_bp_FUS	AC040160.1	FALSE	SK-N-BE	arsenite	bp	1	bp	1	low
SKNBE_ars_G3BP1_bp_FUS	AC046185.3	FALSE	SK-N-BE	arsenite	bp	1	bp	1	low
SKNBE_ars_G3BP1_bp_FUS	AC051619.5	FALSE	SK-N-BE	arsenite	bp	1	bp	1	low
SKNBE_ars_G3BP1_bp_FUS	AC053503.4	FALSE	SK-N-BE	arsenite	bp	1	bp	1	low
SMMC_ars_G3BP1_bp_wt	AC060766.1	FALSE	SMMC-7721	arsenite	bp	1	bp	1	low
Tcell_stim_G3BP1_bp_wt	AC060780.1	FALSE	T cell	stimulation	bp	1	bp	1	low
SMMC_ars_G3BP1_bp_wt	AC064836.4	FALSE	SMMC-7721	arsenite	bp	1	bp	1	low
U2OS_ars_G3BP1_bp_wt	AC064850.4	FALSE	U-2 OS	arsenite	bp	1	bp	1	low
U2OS_ars_ΔEDC3_bp	AC064862.3	FALSE	U-2 OS	arsenite	bp	1	bp	1	low
SKNBE_ars_G3BP1_bp_FUS	AC067838.1	FALSE	SK-N-BE	arsenite	bp	2	bp	2	low
SKNBE_ars_G3BP1_bp_FUS-P525L	AC067838.1	FALSE	SK-N-BE	arsenite	bp	2	bp	2	low
SKNBE_ars_G3BP1_bp_FUS	AC068134.3	FALSE	SK-N-BE	arsenite	bp	1	bp	1	low
Tcell_stim_G3BP1_bp_wt	AC068448.1	FALSE	T cell	stimulation	bp	1	bp	1	low
U2OS_sorb_PABPC1_bp_G3BPko	AC068538.2	FALSE	U-2 OS	sorbitol	bp	1	bp	1	low
SMMC_ars_G3BP1_bp_wt	AC068580.4	FALSE	SMMC-7721	arsenite	bp	1	bp	1	low
Tcell_stim_G3BP1_bp_wt	AC068587.4	FALSE	T cell	stimulation	bp	1	bp	1	low
SKNBE_ars_G3BP1_bp_FUS-P525L	AC068700.1	FALSE	SK-N-BE	arsenite	bp	1	bp	1	low
SKNBE_ars_G3BP1_bp_FUS-P525L	AC068790.2	FALSE	SK-N-BE	arsenite	bp	1	bp	1	low
SMMC_ars_G3BP1_bp_wt	AC068888.1	FALSE	SMMC-7721	arsenite	bp	1	bp	1	low
U2OS_ars_ΔEDC3_bp	AC069282.1	FALSE	U-2 OS	arsenite	bp	1	bp	1	low
SKNBE_ars_G3BP1_bp_FUS-P525L	AC069499.2	FALSE	SK-N-BE	arsenite	bp	1	bp	1	low
SKNBE_ars_G3BP1_bp_FUS	AC069503.1	FALSE	SK-N-BE	arsenite	bp	2	bp	2	low
SKNBE_ars_G3BP1_bp_FUS-P525L	AC069503.1	FALSE	SK-N-BE	arsenite	bp	2	bp	2	low
Tcell_stim_G3BP1_bp_wt	AC072026.2	FALSE	T cell	stimulation	bp	1	bp	1	low
Tcell_stim_G3BP1_bp_wt	AC073046.1	FALSE	T cell	stimulation	bp	5	bp	5	medium
U2OS_ars_ΔEDC3_bp	AC073046.1	FALSE	U-2 OS	arsenite	bp	5	bp	5	medium
HeLa_ars_G3BP1_bp_wt	AC073046.1	FALSE	HeLa	arsenite	bp	5	bp	5	medium
SKNBE_ars_G3BP1_bp_FUS	AC073046.1	FALSE	SK-N-BE	arsenite	bp	5	bp	5	medium
SKNBE_ars_G3BP1_bp_FUS-P525L	AC073046.1	FALSE	SK-N-BE	arsenite	bp	5	bp	5	medium
U2OS_ars_G3BP1_bp_wt	AC073046.25	FALSE	U-2 OS	arsenite	bp	4	bp	4	medium
U2OS_ars_PABPC1_bp_wt	AC073046.25	FALSE	U-2 OS	arsenite	bp	4	bp	4	medium
U2OS_sorb_PABPC1_bp_wt	AC073046.25	FALSE	U-2 OS	sorbitol	bp	4	bp	4	medium
U2OS_sorb_G3BP1_bp_wt	AC073046.25	FALSE	U-2 OS	sorbitol	bp	4	bp	4	medium
SMMC_ars_G3BP1_bp_wt	AC073063.1	FALSE	SMMC-7721	arsenite	bp	1	bp	1	low
U2OS_ars_ΔEDC3_bp	AC073335.2	FALSE	U-2 OS	arsenite	bp	1	bp	1	low
SKNBE_ars_G3BP1_bp_FUS-P525L	AC073343.1	FALSE	SK-N-BE	arsenite	bp	1	bp	1	low
SKNBE_ars_G3BP1_bp_FUS	AC073349.5	FALSE	SK-N-BE	arsenite	bp	1	bp	1	low
U2OS_ars_ΔEDC3_bp	AC073464.1	FALSE	U-2 OS	arsenite	bp	1	bp	1	low
SKNBE_ars_G3BP1_bp_FUS	AC073592.7	FALSE	SK-N-BE	arsenite	bp	1	bp	1	low
U2OS_ars_ΔEDC3_bp	AC073869.1	FALSE	U-2 OS	arsenite	bp	1	bp	1	low
SMMC_ars_G3BP1_bp_wt	AC073957.2	FALSE	SMMC-7721	arsenite	bp	1	bp	1	low
SKNBE_ars_G3BP1_bp_FUS	AC073957.3	FALSE	SK-N-BE	arsenite	bp	1	bp	1	low
SKNBE_ars_G3BP1_bp_FUS	AC074117.2	FALSE	SK-N-BE	arsenite	bp	1	bp	1	low
SKNBE_ars_G3BP1_bp_FUS	AC074135.1	FALSE	SK-N-BE	arsenite	bp	1	bp	1	low
SKNBE_ars_G3BP1_bp_FUS	AC079140.3	FALSE	SK-N-BE	arsenite	bp	1	bp	1	low
SKNBE_ars_G3BP1_bp_FUS	AC079140.5	FALSE	SK-N-BE	arsenite	bp	2	bp	2	low
SKNBE_ars_G3BP1_bp_FUS-P525L	AC079140.5	FALSE	SK-N-BE	arsenite	bp	2	bp	2	low
SMMC_ars_G3BP1_bp_wt	AC079316.2	FALSE	SMMC-7721	arsenite	bp	1	bp	1	low
SKNBE_ars_G3BP1_bp_FUS-P525L	AC079414.3	FALSE	SK-N-BE	arsenite	bp	1	bp	1	low
U2OS_ars_ΔEDC3_bp	AC079466.1	FALSE	U-2 OS	arsenite	bp	1	bp	1	low
U2OS_ars_ΔEDC3_bp	AC079753.1	FALSE	U-2 OS	arsenite	bp	1	bp	1	low
SMMC_ars_G3BP1_bp_wt	AC079921.2	FALSE	SMMC-7721	arsenite	bp	1	bp	1	low
Tcell_stim_G3BP1_bp_wt	AC083899.1	FALSE	T cell	stimulation	bp	2	bp	2	low
U2OS_ars_ΔEDC3_bp	AC083899.1	FALSE	U-2 OS	arsenite	bp	2	bp	2	low
SMMC_ars_G3BP1_bp_wt	AC084125.2	FALSE	SMMC-7721	arsenite	bp	1	bp	1	low
SKNBE_ars_G3BP1_bp_FUS	AC084125.4	FALSE	SK-N-BE	arsenite	bp	1	bp	1	low
SKNBE_ars_G3BP1_bp_FUS	AC084262.1	FALSE	SK-N-BE	arsenite	bp	1	bp	1	low
SMMC_ars_G3BP1_bp_wt	AC084824.2	FALSE	SMMC-7721	arsenite	bp	1	bp	1	low
HeLa_ars_G3BP1_bp_wt	AC087190.1	FALSE	HeLa	arsenite	bp	1	bp	1	low
HeLa_ars_G3BP1_bp_wt	AC087190.3	FALSE	HeLa	arsenite	bp	1	bp	1	low
SMMC_ars_G3BP1_bp_wt	AC087286.3	FALSE	SMMC-7721	arsenite	bp	1	bp	1	low
Tcell_stim_G3BP1_bp_wt	AC087292.1	FALSE	T cell	stimulation	bp	1	bp	1	low
U2OS_ars_ΔEDC3_bp	AC087392.5	FALSE	U-2 OS	arsenite	bp	1	bp	1	low
Tcell_stim_G3BP1_bp_wt	AC087473.1	FALSE	T cell	stimulation	bp	1	bp	1	low
SKNBE_ars_G3BP1_bp_FUS	AC087741.1	FALSE	SK-N-BE	arsenite	bp	1	bp	1	low
Tcell_stim_G3BP1_bp_wt	AC087854.1	FALSE	T cell	stimulation	bp	1	bp	1	low
SMMC_ars_G3BP1_bp_wt	AC087855.2	FALSE	SMMC-7721	arsenite	bp	1	bp	1	low
Tcell_stim_G3BP1_bp_wt	AC090114.3	FALSE	T cell	stimulation	bp	3	bp	3	low
SKNBE_ars_G3BP1_bp_FUS	AC090114.3	FALSE	SK-N-BE	arsenite	bp	3	bp	3	low
SMMC_ars_G3BP1_bp_wt	AC090114.3	FALSE	SMMC-7721	arsenite	bp	3	bp	3	low
SKNBE_ars_G3BP1_bp_FUS-P525L	AC090198.1	FALSE	SK-N-BE	arsenite	bp	1	bp	1	low
SMMC_ars_G3BP1_bp_wt	AC090286.3	FALSE	SMMC-7721	arsenite	bp	1	bp	1	low
SKNBE_ars_G3BP1_bp_FUS	AC090519.1	FALSE	SK-N-BE	arsenite	bp	1	bp	1	low
Tcell_stim_G3BP1_bp_wt	AC090587.2	FALSE	T cell	stimulation	bp	2	bp	2	low
SKNBE_ars_G3BP1_bp_FUS	AC090587.2	FALSE	SK-N-BE	arsenite	bp	2	bp	2	low
Tcell_stim_G3BP1_bp_wt	AC090948.2	FALSE	T cell	stimulation	bp	1	bp	1	low
Tcell_stim_G3BP1_bp_wt	AC091021.1	FALSE	T cell	stimulation	bp	1	bp	1	low
SKNBE_ars_G3BP1_bp_FUS	AC091132.5	FALSE	SK-N-BE	arsenite	bp	1	bp	1	low
U2OS_ars_PABPC1_bp_wt	AC091171.1	FALSE	U-2 OS	arsenite	bp	1	bp	1	low
SKNBE_ars_G3BP1_bp_FUS	AC091178.2	FALSE	SK-N-BE	arsenite	bp	1	bp	1	low
SMMC_ars_G3BP1_bp_wt	AC091181.1	FALSE	SMMC-7721	arsenite	bp	1	bp	1	low
SKNBE_ars_G3BP1_bp_FUS-P525L	AC091563.1	FALSE	SK-N-BE	arsenite	bp	1	bp	1	low
U2OS_ars_ΔEDC3_bp	AC091982.2	FALSE	U-2 OS	arsenite	bp	1	bp	1	low
SKNBE_ars_G3BP1_bp_FUS-P525L	AC092070.2	FALSE	SK-N-BE	arsenite	bp	1	bp	1	low
SMMC_ars_G3BP1_bp_wt	AC092115.2	FALSE	SMMC-7721	arsenite	bp	1	bp	1	low
SKNBE_ars_G3BP1_bp_FUS	AC092127.1	FALSE	SK-N-BE	arsenite	bp	3	bp	3	low
SKNBE_ars_G3BP1_bp_FUS-P525L	AC092127.1	FALSE	SK-N-BE	arsenite	bp	3	bp	3	low
SMMC_ars_G3BP1_bp_wt	AC092127.1	FALSE	SMMC-7721	arsenite	bp	3	bp	3	low
SKNBE_ars_G3BP1_bp_FUS	AC092139.1	FALSE	SK-N-BE	arsenite	bp	3	bp	3	low
SKNBE_ars_G3BP1_bp_FUS-P525L	AC092139.1	FALSE	SK-N-BE	arsenite	bp	3	bp	3	low
SMMC_ars_G3BP1_bp_wt	AC092139.1	FALSE	SMMC-7721	arsenite	bp	3	bp	3	low
SMMC_ars_G3BP1_bp_wt	AC092139.3	FALSE	SMMC-7721	arsenite	bp	1	bp	1	low
U2OS_ars_ΔEDC3_bp	AC092171.2	FALSE	U-2 OS	arsenite	bp	1	bp	1	low
U2OS_ars_ΔEDC3_bp	AC092171.3	FALSE	U-2 OS	arsenite	bp	1	bp	1	low
U2OS_ars_G3BP1_bp_wt	AC092171.4	FALSE	U-2 OS	arsenite	bp	5	bp	5	medium
U2OS_ars_PABPC1_bp_wt	AC092171.4	FALSE	U-2 OS	arsenite	bp	5	bp	5	medium
U2OS_sorb_PABPC1_bp_wt	AC092171.4	FALSE	U-2 OS	sorbitol	bp	5	bp	5	medium
U2OS_sorb_PABPC1_bp_G3BPko	AC092171.4	FALSE	U-2 OS	sorbitol	bp	5	bp	5	medium
U2OS_sorb_G3BP1_bp_wt	AC092171.4	FALSE	U-2 OS	sorbitol	bp	5	bp	5	medium
Tcell_stim_G3BP1_bp_wt	AC092184.1	FALSE	T cell	stimulation	bp	1	bp	1	low
SKNBE_ars_G3BP1_bp_FUS-P525L	AC092279.1	FALSE	SK-N-BE	arsenite	bp	1	bp	1	low
SKNBE_ars_G3BP1_bp_FUS	AC092279.3	FALSE	SK-N-BE	arsenite	bp	1	bp	1	low
SMMC_ars_G3BP1_bp_wt	AC092295.2	FALSE	SMMC-7721	arsenite	bp	1	bp	1	low
SKNBE_ars_G3BP1_bp_FUS	AC092368.3	FALSE	SK-N-BE	arsenite	bp	1	bp	1	low
SKNBE_ars_G3BP1_bp_FUS	AC092428.1	FALSE	SK-N-BE	arsenite	bp	2	bp	2	low
SMMC_ars_G3BP1_bp_wt	AC092428.1	FALSE	SMMC-7721	arsenite	bp	2	bp	2	low
Tcell_stim_G3BP1_bp_wt	AC092445.1	FALSE	T cell	stimulation	bp	1	bp	1	low
SKNBE_ars_G3BP1_bp_FUS	AC092653.1	FALSE	SK-N-BE	arsenite	bp	1	bp	1	low
SKNBE_ars_G3BP1_bp_FUS-P525L	AC092747.4	FALSE	SK-N-BE	arsenite	bp	1	bp	1	low
Tcell_stim_G3BP1_bp_wt	AC092802.1	FALSE	T cell	stimulation	bp	1	bp	1	low
SKNBE_ars_G3BP1_bp_FUS	AC092835.1	FALSE	SK-N-BE	arsenite	bp	2	bp	2	low
SKNBE_ars_G3BP1_bp_FUS-P525L	AC092835.1	FALSE	SK-N-BE	arsenite	bp	2	bp	2	low
U2OS_ars_G3BP1_bp_wt	AC092835.2	FALSE	U-2 OS	arsenite	bp	5	bp	5	medium
U2OS_ars_PABPC1_bp_wt	AC092835.2	FALSE	U-2 OS	arsenite	bp	5	bp	5	medium
U2OS_sorb_PABPC1_bp_wt	AC092835.2	FALSE	U-2 OS	sorbitol	bp	5	bp	5	medium
U2OS_sorb_PABPC1_bp_G3BPko	AC092835.2	FALSE	U-2 OS	sorbitol	bp	5	bp	5	medium
U2OS_sorb_G3BP1_bp_wt	AC092835.2	FALSE	U-2 OS	sorbitol	bp	5	bp	5	medium
Tcell_stim_G3BP1_bp_wt	AC092881.1	FALSE	T cell	stimulation	bp	1	bp	1	low
Tcell_stim_G3BP1_bp_wt	AC092902.4	FALSE	T cell	stimulation	bp	1	bp	1	low
HeLa_ars_G3BP1_bp_wt	AC093010.2	FALSE	HeLa	arsenite	bp	2	bp	2	low
HeLa_ars_G3BP1_bp_NAT10ko	AC093010.2	FALSE	HeLa	arsenite	bp	2	bp	2	low
Tcell_stim_G3BP1_bp_wt	AC093010.3	FALSE	T cell	stimulation	bp	1	bp	1	low
SKNBE_ars_G3BP1_bp_FUS-P525L	AC093227.1	FALSE	SK-N-BE	arsenite	bp	1	bp	1	low
Tcell_stim_G3BP1_bp_wt	AC093297.2	FALSE	T cell	stimulation	bp	6	bp	6	medium
HeLa_ars_G3BP1_bp_wt	AC093297.2	FALSE	HeLa	arsenite	bp	6	bp	6	medium
HeLa_ars_G3BP1_bp_NAT10ko	AC093297.2	FALSE	HeLa	arsenite	bp	6	bp	6	medium
SKNBE_ars_G3BP1_bp_FUS	AC093297.2	FALSE	SK-N-BE	arsenite	bp	6	bp	6	medium
SKNBE_ars_G3BP1_bp_FUS-P525L	AC093297.2	FALSE	SK-N-BE	arsenite	bp	6	bp	6	medium
SMMC_ars_G3BP1_bp_wt	AC093297.2	FALSE	SMMC-7721	arsenite	bp	6	bp	6	medium
SKNBE_ars_G3BP1_bp_FUS	AC093525.4	FALSE	SK-N-BE	arsenite	bp	1	bp	1	low
SMMC_ars_G3BP1_bp_wt	AC093525.8	FALSE	SMMC-7721	arsenite	bp	1	bp	1	low
SKNBE_ars_G3BP1_bp_FUS	AC095057.3	FALSE	SK-N-BE	arsenite	bp	2	bp	2	low
SKNBE_ars_G3BP1_bp_FUS-P525L	AC095057.3	FALSE	SK-N-BE	arsenite	bp	2	bp	2	low
SMMC_ars_G3BP1_bp_wt	AC097263.1	FALSE	SMMC-7721	arsenite	bp	1	bp	1	low
U2OS_ars_ΔEDC3_bp	AC097374.1	FALSE	U-2 OS	arsenite	bp	1	bp	1	low
U2OS_ars_G3BP1_bp_wt	AC097499.2	FALSE	U-2 OS	arsenite	bp	1	bp	1	low
Tcell_stim_G3BP1_bp_wt	AC098582.1	FALSE	T cell	stimulation	bp	1	bp	1	low
U2OS_sorb_PABPC1_bp_wt	AC098614.2	FALSE	U-2 OS	sorbitol	bp	2	bp	2	low
U2OS_sorb_PABPC1_bp_G3BPko	AC098614.2	FALSE	U-2 OS	sorbitol	bp	2	bp	2	low
SMMC_ars_G3BP1_bp_wt	AC098614.3	FALSE	SMMC-7721	arsenite	bp	1	bp	1	low
SKNBE_ars_G3BP1_bp_FUS-P525L	AC099499.2	FALSE	SK-N-BE	arsenite	bp	1	bp	1	low
Tcell_stim_G3BP1_bp_wt	AC099548.2	FALSE	T cell	stimulation	bp	1	bp	1	low
Tcell_stim_G3BP1_bp_wt	AC099550.1	FALSE	T cell	stimulation	bp	1	bp	1	low
SMMC_ars_G3BP1_bp_wt	AC100793.2	FALSE	SMMC-7721	arsenite	bp	1	bp	1	low
SKNBE_ars_G3BP1_bp_FUS-P525L	AC100814.2	FALSE	SK-N-BE	arsenite	bp	1	bp	1	low
U2OS_ars_ΔEDC3_bp	AC102953.2	FALSE	U-2 OS	arsenite	bp	3	bp	3	low
SKNBE_ars_G3BP1_bp_FUS	AC102953.2	FALSE	SK-N-BE	arsenite	bp	3	bp	3	low
SMMC_ars_G3BP1_bp_wt	AC102953.2	FALSE	SMMC-7721	arsenite	bp	3	bp	3	low
SMMC_ars_G3BP1_bp_wt	AC103691.1	FALSE	SMMC-7721	arsenite	bp	1	bp	1	low
SKNBE_ars_G3BP1_bp_FUS-P525L	AC104083.1	FALSE	SK-N-BE	arsenite	bp	1	bp	1	low
SKNBE_ars_G3BP1_bp_FUS-P525L	AC104113.1	FALSE	SK-N-BE	arsenite	bp	1	bp	1	low
SKNBE_ars_G3BP1_bp_FUS-P525L	AC104447.1	FALSE	SK-N-BE	arsenite	bp	1	bp	1	low
U2OS_ars_ΔEDC3_bp	AC104561.1	FALSE	U-2 OS	arsenite	bp	3	bp	3	low
SKNBE_ars_G3BP1_bp_FUS	AC104561.1	FALSE	SK-N-BE	arsenite	bp	3	bp	3	low
SKNBE_ars_G3BP1_bp_FUS-P525L	AC104561.1	FALSE	SK-N-BE	arsenite	bp	3	bp	3	low
SKNBE_ars_G3BP1_bp_FUS-P525L	AC104561.4	FALSE	SK-N-BE	arsenite	bp	1	bp	1	low
U2OS_ars_ΔEDC3_bp	AC104825.1	FALSE	U-2 OS	arsenite	bp	3	bp	3	low
SKNBE_ars_G3BP1_bp_FUS	AC104825.1	FALSE	SK-N-BE	arsenite	bp	3	bp	3	low
SKNBE_ars_G3BP1_bp_FUS-P525L	AC104825.1	FALSE	SK-N-BE	arsenite	bp	3	bp	3	low
SKNBE_ars_G3BP1_bp_FUS	AC105036.3	FALSE	SK-N-BE	arsenite	bp	1	bp	1	low
U2OS_ars_ΔEDC3_bp	AC106795.1	FALSE	U-2 OS	arsenite	bp	1	bp	1	low
SKNBE_ars_G3BP1_bp_FUS	AC106820.4	FALSE	SK-N-BE	arsenite	bp	1	bp	1	low
SKNBE_ars_G3BP1_bp_FUS	AC106820.5	FALSE	SK-N-BE	arsenite	bp	1	bp	1	low
SKNBE_ars_G3BP1_bp_FUS	AC106886.5	FALSE	SK-N-BE	arsenite	bp	1	bp	1	low
SKNBE_ars_G3BP1_bp_FUS	AC107027.3	FALSE	SK-N-BE	arsenite	bp	2	bp	2	low
SKNBE_ars_G3BP1_bp_FUS-P525L	AC107027.3	FALSE	SK-N-BE	arsenite	bp	2	bp	2	low
SKNBE_ars_G3BP1_bp_FUS	AC107068.1	FALSE	SK-N-BE	arsenite	bp	2	bp	2	low
SKNBE_ars_G3BP1_bp_FUS-P525L	AC107068.1	FALSE	SK-N-BE	arsenite	bp	2	bp	2	low
Tcell_stim_G3BP1_bp_wt	AC107204.1	FALSE	T cell	stimulation	bp	1	bp	1	low
U2OS_ars_ΔEDC3_bp	AC107375.1	FALSE	U-2 OS	arsenite	bp	2	bp	2	low
SMMC_ars_G3BP1_bp_wt	AC107375.1	FALSE	SMMC-7721	arsenite	bp	2	bp	2	low
SKNBE_ars_G3BP1_bp_FUS	AC107871.1	FALSE	SK-N-BE	arsenite	bp	1	bp	1	low
SKNBE_ars_G3BP1_bp_FUS	AC107959.1	FALSE	SK-N-BE	arsenite	bp	1	bp	1	low
U2OS_ars_ΔEDC3_bp	AC108010.1	FALSE	U-2 OS	arsenite	bp	2	bp	2	low
SKNBE_ars_G3BP1_bp_FUS	AC108010.1	FALSE	SK-N-BE	arsenite	bp	2	bp	2	low
SMMC_ars_G3BP1_bp_wt	AC108134.1	FALSE	SMMC-7721	arsenite	bp	1	bp	1	low
Tcell_stim_G3BP1_bp_wt	AC108449.2	FALSE	T cell	stimulation	bp	3	bp	3	low
SKNBE_ars_G3BP1_bp_FUS	AC108449.2	FALSE	SK-N-BE	arsenite	bp	3	bp	3	low
SKNBE_ars_G3BP1_bp_FUS-P525L	AC108449.2	FALSE	SK-N-BE	arsenite	bp	3	bp	3	low
Tcell_stim_G3BP1_bp_wt	AC108449.3	FALSE	T cell	stimulation	bp	1	bp	1	low
SKNBE_ars_G3BP1_bp_FUS	AC108463.1	FALSE	SK-N-BE	arsenite	bp	1	bp	1	low
SKNBE_ars_G3BP1_bp_FUS	AC109449.1	FALSE	SK-N-BE	arsenite	bp	1	bp	1	low
Tcell_stim_G3BP1_bp_wt	AC109466.1	FALSE	T cell	stimulation	bp	1	bp	1	low
U2OS_ars_ΔEDC3_bp	AC110048.2	FALSE	U-2 OS	arsenite	bp	1	bp	1	low
SMMC_ars_G3BP1_bp_wt	AC110597.1	FALSE	SMMC-7721	arsenite	bp	1	bp	1	low
SMMC_ars_G3BP1_bp_wt	AC110994.3	FALSE	SMMC-7721	arsenite	bp	1	bp	1	low
SKNBE_ars_G3BP1_bp_FUS	AC111170.3	FALSE	SK-N-BE	arsenite	bp	2	bp	2	low
SMMC_ars_G3BP1_bp_wt	AC111170.3	FALSE	SMMC-7721	arsenite	bp	2	bp	2	low
SKNBE_ars_G3BP1_bp_FUS	AC111170.4	FALSE	SK-N-BE	arsenite	bp	3	bp	3	low
SKNBE_ars_G3BP1_bp_FUS-P525L	AC111170.4	FALSE	SK-N-BE	arsenite	bp	3	bp	3	low
SMMC_ars_G3BP1_bp_wt	AC111170.4	FALSE	SMMC-7721	arsenite	bp	3	bp	3	low
U2OS_ars_ΔEDC3_bp	AC112128.1	FALSE	U-2 OS	arsenite	bp	1	bp	1	low
SMMC_ars_G3BP1_bp_wt	AC112191.2	FALSE	SMMC-7721	arsenite	bp	1	bp	1	low
Tcell_stim_G3BP1_bp_wt	AC112481.2	FALSE	T cell	stimulation	bp	1	bp	1	low
U2OS_ars_G3BP1_bp_wt	AC112721.1	FALSE	U-2 OS	arsenite	bp	1	bp	1	low
U2OS_ars_ΔEDC3_bp	AC112721.2	FALSE	U-2 OS	arsenite	bp	2	bp	2	low
U2OS_ars_G3BP1_bp_wt	AC112721.2	FALSE	U-2 OS	arsenite	bp	2	bp	2	low
SMMC_ars_G3BP1_bp_wt	AC112777.1	FALSE	SMMC-7721	arsenite	bp	1	bp	1	low
HeLa_ars_G3BP1_bp_wt	AC113191.1	FALSE	HeLa	arsenite	bp	1	bp	1	low
SKNBE_ars_G3BP1_bp_FUS	AC114341.1	FALSE	SK-N-BE	arsenite	bp	1	bp	1	low
Tcell_stim_G3BP1_bp_wt	AC114490.2	FALSE	T cell	stimulation	bp	1	bp	1	low
SKNBE_ars_G3BP1_bp_FUS	AC116025.2	FALSE	SK-N-BE	arsenite	bp	1	bp	1	low
SKNBE_ars_G3BP1_bp_FUS	AC116407.4	FALSE	SK-N-BE	arsenite	bp	1	bp	1	low
SKNBE_ars_G3BP1_bp_FUS	AC116609.3	FALSE	SK-N-BE	arsenite	bp	1	bp	1	low
SKNBE_ars_G3BP1_bp_FUS	AC116612.1	FALSE	SK-N-BE	arsenite	bp	1	bp	1	low
SMMC_ars_G3BP1_bp_wt	AC117382.1	FALSE	SMMC-7721	arsenite	bp	1	bp	1	low
SKNBE_ars_G3BP1_bp_FUS	AC118344.1	FALSE	SK-N-BE	arsenite	bp	3	bp	3	low
SKNBE_ars_G3BP1_bp_FUS-P525L	AC118344.1	FALSE	SK-N-BE	arsenite	bp	3	bp	3	low
SMMC_ars_G3BP1_bp_wt	AC118344.1	FALSE	SMMC-7721	arsenite	bp	3	bp	3	low
Tcell_stim_G3BP1_bp_wt	AC118549.1	FALSE	T cell	stimulation	bp	2	bp	2	low
SKNBE_ars_G3BP1_bp_FUS-P525L	AC118549.1	FALSE	SK-N-BE	arsenite	bp	2	bp	2	low
Tcell_stim_G3BP1_bp_wt	AC119396.1	FALSE	T cell	stimulation	bp	1	bp	1	low
Tcell_stim_G3BP1_bp_wt	AC120053.1	FALSE	T cell	stimulation	bp	3	bp	3	low
SKNBE_ars_G3BP1_bp_FUS	AC120053.1	FALSE	SK-N-BE	arsenite	bp	3	bp	3	low
SKNBE_ars_G3BP1_bp_FUS-P525L	AC120053.1	FALSE	SK-N-BE	arsenite	bp	3	bp	3	low
SMMC_ars_G3BP1_bp_wt	AC120057.4	FALSE	SMMC-7721	arsenite	bp	1	bp	1	low
SMMC_ars_G3BP1_bp_wt	AC120114.1	FALSE	SMMC-7721	arsenite	bp	1	bp	1	low
U2OS_ars_ΔEDC3_bp	AC121247.1	FALSE	U-2 OS	arsenite	bp	1	bp	1	low
SKNBE_ars_G3BP1_bp_FUS	AC122129.2	FALSE	SK-N-BE	arsenite	bp	1	bp	1	low
SMMC_ars_G3BP1_bp_wt	AC122718.1	FALSE	SMMC-7721	arsenite	bp	1	bp	1	low
Tcell_stim_G3BP1_bp_wt	AC124319.1	FALSE	T cell	stimulation	bp	1	bp	1	low
SKNBE_ars_G3BP1_bp_FUS	AC124798.1	FALSE	SK-N-BE	arsenite	bp	1	bp	1	low
HeLa_ars_G3BP1_bp_wt	AC125257.1	FALSE	HeLa	arsenite	bp	1	bp	1	low
SMMC_ars_G3BP1_bp_wt	AC125611.2	FALSE	SMMC-7721	arsenite	bp	1	bp	1	low
U2OS_ars_ΔEDC3_bp	AC125807.2	FALSE	U-2 OS	arsenite	bp	3	bp	3	low
HeLa_ars_G3BP1_bp_wt	AC125807.2	FALSE	HeLa	arsenite	bp	3	bp	3	low
SMMC_ars_G3BP1_bp_wt	AC125807.2	FALSE	SMMC-7721	arsenite	bp	3	bp	3	low
SKNBE_ars_G3BP1_bp_FUS	AC126755.1	FALSE	SK-N-BE	arsenite	bp	2	bp	2	low
SKNBE_ars_G3BP1_bp_FUS-P525L	AC126755.1	FALSE	SK-N-BE	arsenite	bp	2	bp	2	low
SKNBE_ars_G3BP1_bp_FUS	AC127496.7	FALSE	SK-N-BE	arsenite	bp	3	bp	3	low
SKNBE_ars_G3BP1_bp_FUS-P525L	AC127496.7	FALSE	SK-N-BE	arsenite	bp	3	bp	3	low
SMMC_ars_G3BP1_bp_wt	AC127496.7	FALSE	SMMC-7721	arsenite	bp	3	bp	3	low
SMMC_ars_G3BP1_bp_wt	AC127502.2	FALSE	SMMC-7721	arsenite	bp	1	bp	1	low
Tcell_stim_G3BP1_bp_wt	AC129492.1	FALSE	T cell	stimulation	bp	1	bp	1	low
Tcell_stim_G3BP1_bp_wt	AC130304.1	FALSE	T cell	stimulation	bp	1	bp	1	low
Tcell_stim_G3BP1_bp_wt	AC130343.1	FALSE	T cell	stimulation	bp	1	bp	1	low
SKNBE_ars_G3BP1_bp_FUS	AC130371.2	FALSE	SK-N-BE	arsenite	bp	1	bp	1	low
SMMC_ars_G3BP1_bp_wt	AC131212.2	FALSE	SMMC-7721	arsenite	bp	1	bp	1	low
U2OS_ars_ΔEDC3_bp	AC131212.3	FALSE	U-2 OS	arsenite	bp	3	bp	3	low
SKNBE_ars_G3BP1_bp_FUS	AC131212.3	FALSE	SK-N-BE	arsenite	bp	3	bp	3	low
SMMC_ars_G3BP1_bp_wt	AC131212.3	FALSE	SMMC-7721	arsenite	bp	3	bp	3	low
SKNBE_ars_G3BP1_bp_FUS	AC131212.4	FALSE	SK-N-BE	arsenite	bp	1	bp	1	low
Tcell_stim_G3BP1_bp_wt	AC131649.2	FALSE	T cell	stimulation	bp	1	bp	1	low
SMMC_ars_G3BP1_bp_wt	AC132068.1	FALSE	SMMC-7721	arsenite	bp	1	bp	1	low
SMMC_ars_G3BP1_bp_wt	AC132872.3	FALSE	SMMC-7721	arsenite	bp	1	bp	1	low
SMMC_ars_G3BP1_bp_wt	AC132872.4	FALSE	SMMC-7721	arsenite	bp	1	bp	1	low
SKNBE_ars_G3BP1_bp_FUS	AC133540.1	FALSE	SK-N-BE	arsenite	bp	1	bp	1	low
SKNBE_ars_G3BP1_bp_FUS	AC134349.1	FALSE	SK-N-BE	arsenite	bp	1	bp	1	low
SKNBE_ars_G3BP1_bp_FUS	AC134349.2	FALSE	SK-N-BE	arsenite	bp	1	bp	1	low
SKNBE_ars_G3BP1_bp_FUS	AC135178.6	FALSE	SK-N-BE	arsenite	bp	2	bp	2	low
SMMC_ars_G3BP1_bp_wt	AC135178.6	FALSE	SMMC-7721	arsenite	bp	2	bp	2	low
SKNBE_ars_G3BP1_bp_FUS	AC135506.1	FALSE	SK-N-BE	arsenite	bp	1	bp	1	low
SMMC_ars_G3BP1_bp_wt	AC136469.2	FALSE	SMMC-7721	arsenite	bp	1	bp	1	low
U2OS_ars_ΔEDC3_bp	AC136475.3	FALSE	U-2 OS	arsenite	bp	1	bp	1	low
SMMC_ars_G3BP1_bp_wt	AC137630.2	FALSE	SMMC-7721	arsenite	bp	1	bp	1	low
SKNBE_ars_G3BP1_bp_FUS	AC137695.1	FALSE	SK-N-BE	arsenite	bp	1	bp	1	low
SKNBE_ars_G3BP1_bp_FUS	AC138028.1	FALSE	SK-N-BE	arsenite	bp	1	bp	1	low
SKNBE_ars_G3BP1_bp_FUS	AC138028.2	FALSE	SK-N-BE	arsenite	bp	2	bp	2	low
SKNBE_ars_G3BP1_bp_FUS-P525L	AC138028.2	FALSE	SK-N-BE	arsenite	bp	2	bp	2	low
SKNBE_ars_G3BP1_bp_FUS	AC138028.4	FALSE	SK-N-BE	arsenite	bp	2	bp	2	low
SKNBE_ars_G3BP1_bp_FUS-P525L	AC138028.4	FALSE	SK-N-BE	arsenite	bp	2	bp	2	low
SKNBE_ars_G3BP1_bp_FUS	AC138028.5	FALSE	SK-N-BE	arsenite	bp	1	bp	1	low
SMMC_ars_G3BP1_bp_wt	AC138028.6	FALSE	SMMC-7721	arsenite	bp	1	bp	1	low
SKNBE_ars_G3BP1_bp_FUS	AC138035.1	FALSE	SK-N-BE	arsenite	bp	1	bp	1	low
U2OS_ars_ΔEDC3_bp	AC138409.1	FALSE	U-2 OS	arsenite	bp	1	bp	1	low
Tcell_stim_G3BP1_bp_wt	AC138409.2	FALSE	T cell	stimulation	bp	1	bp	1	low
U2OS_ars_G3BP1_bp_wt	AC138623.1	FALSE	U-2 OS	arsenite	bp	1	bp	1	low
SKNBE_ars_G3BP1_bp_FUS	AC138649.4	FALSE	SK-N-BE	arsenite	bp	1	bp	1	low
Tcell_stim_G3BP1_bp_wt	AC138932.1	FALSE	T cell	stimulation	bp	2	bp	2	low
SKNBE_ars_G3BP1_bp_FUS	AC138932.1	FALSE	SK-N-BE	arsenite	bp	2	bp	2	low
SKNBE_ars_G3BP1_bp_FUS	AC139149.1	FALSE	SK-N-BE	arsenite	bp	1	bp	1	low
SKNBE_ars_G3BP1_bp_FUS	AC139426.1	FALSE	SK-N-BE	arsenite	bp	2	bp	2	low
SKNBE_ars_G3BP1_bp_FUS-P525L	AC139426.1	FALSE	SK-N-BE	arsenite	bp	2	bp	2	low
SMMC_ars_G3BP1_bp_wt	AC139530.3	FALSE	SMMC-7721	arsenite	bp	1	bp	1	low
SKNBE_ars_G3BP1_bp_FUS	AC140847.2	FALSE	SK-N-BE	arsenite	bp	1	bp	1	low
SKNBE_ars_G3BP1_bp_FUS	AC141586.1	FALSE	SK-N-BE	arsenite	bp	1	bp	1	low
SMMC_ars_G3BP1_bp_wt	AC141930.1	FALSE	SMMC-7721	arsenite	bp	1	bp	1	low
SKNBE_ars_G3BP1_bp_FUS	AC144831.1	FALSE	SK-N-BE	arsenite	bp	1	bp	1	low
SMMC_ars_G3BP1_bp_wt	AC145098.2	FALSE	SMMC-7721	arsenite	bp	1	bp	1	low
SKNBE_ars_G3BP1_bp_FUS	AC145207.1	FALSE	SK-N-BE	arsenite	bp	1	bp	1	low
SMMC_ars_G3BP1_bp_wt	AC145207.2	FALSE	SMMC-7721	arsenite	bp	1	bp	1	low
SKNBE_ars_G3BP1_bp_FUS	AC145207.4	FALSE	SK-N-BE	arsenite	bp	1	bp	1	low
U2OS_ars_ΔEDC3_bp	AC145207.5	FALSE	U-2 OS	arsenite	bp	4	bp	4	medium
HeLa_ars_G3BP1_bp_wt	AC145207.5	FALSE	HeLa	arsenite	bp	4	bp	4	medium
SKNBE_ars_G3BP1_bp_FUS	AC145207.5	FALSE	SK-N-BE	arsenite	bp	4	bp	4	medium
SKNBE_ars_G3BP1_bp_FUS-P525L	AC145207.5	FALSE	SK-N-BE	arsenite	bp	4	bp	4	medium
SMMC_ars_G3BP1_bp_wt	AC148477.5	FALSE	SMMC-7721	arsenite	bp	1	bp	1	low
SMMC_ars_G3BP1_bp_wt	AC148477.7	FALSE	SMMC-7721	arsenite	bp	1	bp	1	low
U2OS_ars_ΔEDC3_bp	AC183088.2	FALSE	U-2 OS	arsenite	bp	1	bp	1	low
U2OS_ars_ΔEDC3_bp	AC237221.1	FALSE	U-2 OS	arsenite	bp	1	bp	1	low
U2OS_ars_ΔEDC3_bp	AC239799.1	FALSE	U-2 OS	arsenite	bp	1	bp	1	low
SKNBE_ars_G3BP1_bp_FUS	AC240274.1	FALSE	SK-N-BE	arsenite	bp	2	bp	2	low
SMMC_ars_G3BP1_bp_wt	AC240274.1	FALSE	SMMC-7721	arsenite	bp	2	bp	2	low
SKNBE_ars_G3BP1_bp_FUS	AC241952.2	FALSE	SK-N-BE	arsenite	bp	1	bp	1	low
Tcell_stim_G3BP1_bp_wt	AC242843.1	FALSE	T cell	stimulation	bp	1	bp	1	low
Tcell_stim_G3BP1_bp_wt	AC243585.2	FALSE	T cell	stimulation	bp	1	bp	1	low
SMMC_ars_G3BP1_bp_wt	AC243960.2	FALSE	SMMC-7721	arsenite	bp	1	bp	1	low
SMMC_ars_G3BP1_bp_wt	AC244033.2	FALSE	SMMC-7721	arsenite	bp	1	bp	1	low
U2OS_ars_ΔEDC3_bp	AC244517.5	FALSE	U-2 OS	arsenite	bp	1	bp	1	low
SKNBE_ars_G3BP1_bp_FUS	AC244517.6	FALSE	SK-N-BE	arsenite	bp	2	bp	2	low
SKNBE_ars_G3BP1_bp_FUS-P525L	AC244517.6	FALSE	SK-N-BE	arsenite	bp	2	bp	2	low
U2OS_ars_ΔEDC3_bp	AC245041.1	FALSE	U-2 OS	arsenite	bp	1	bp	1	low
SMMC_ars_G3BP1_bp_wt	AC245052.3	FALSE	SMMC-7721	arsenite	bp	1	bp	1	low
SMMC_ars_G3BP1_bp_wt	AC245060.5	FALSE	SMMC-7721	arsenite	bp	1	bp	1	low
SKNBE_ars_G3BP1_bp_FUS	AC245452.1	FALSE	SK-N-BE	arsenite	bp	1	bp	1	low
SKNBE_ars_G3BP1_bp_FUS	AC246787.2	FALSE	SK-N-BE	arsenite	bp	1	bp	1	low
SKNBE_ars_G3BP1_bp_FUS	AC253536.3	FALSE	SK-N-BE	arsenite	bp	1	bp	1	low
SKNBE_ars_G3BP1_bp_FUS	AC254562.3	FALSE	SK-N-BE	arsenite	bp	1	bp	1	low
U2OS_ars_G3BP1_pl_wt	ACAA2	TRUE	U-2 OS	arsenite	pl	6	bp_pl_fanci	7	medium
Tcell_stim_G3BP1_bp_wt	ACAA2	TRUE	T cell	stimulation	bp	6	bp_pl_fanci	7	medium
U251_ars_TIAL1_bp_wt	ACAA2	TRUE	U251	arsenite	bp	6	bp_pl_fanci	7	medium
HeLa_ars_G3BP1_fanci_wt	ACAA2	TRUE	HeLa	arsenite	fanci	6	bp_pl_fanci	7	medium
HeLa_heat_G3BP1_fanci_wt	ACAA2	TRUE	HeLa	heatshock	fanci	6	bp_pl_fanci	7	medium
HeLa_osm_G3BP1_fanci_wt	ACAA2	TRUE	HeLa	osmosis	fanci	6	bp_pl_fanci	7	medium
U2OS_ars_ΔEDC3_bp	ACACA	TRUE	U-2 OS	arsenite	bp	5	bp	5	medium
U2OS_ars_G3BP1_bp_wt	ACACA	TRUE	U-2 OS	arsenite	bp	5	bp	5	medium
U2OS_ars_PABPC1_bp_wt	ACACA	TRUE	U-2 OS	arsenite	bp	5	bp	5	medium
SKNBE_ars_G3BP1_bp_FUS	ACACA	TRUE	SK-N-BE	arsenite	bp	5	bp	5	medium
SKNBE_ars_G3BP1_bp_FUS-P525L	ACACA	TRUE	SK-N-BE	arsenite	bp	5	bp	5	medium
Tcell_stim_G3BP1_bp_wt	ACACB	TRUE	T cell	stimulation	bp	4	bp	4	medium
U2OS_ars_ΔEDC3_bp	ACACB	TRUE	U-2 OS	arsenite	bp	4	bp	4	medium
SKNBE_ars_G3BP1_bp_FUS	ACACB	TRUE	SK-N-BE	arsenite	bp	4	bp	4	medium
SMMC_ars_G3BP1_bp_wt	ACACB	TRUE	SMMC-7721	arsenite	bp	4	bp	4	medium
Tcell_stim_G3BP1_bp_wt	ACAD10	TRUE	T cell	stimulation	bp	1	bp	1	low
Tcell_stim_G3BP1_bp_wt	ACAD11	TRUE	T cell	stimulation	bp	1	bp	1	low
Tcell_stim_G3BP1_bp_wt	ACAD9	TRUE	T cell	stimulation	bp	1	bp	1	low
HeLa_ars_G3BP1_pic_wt	ACADL	TRUE	HeLa	arsenite	pic	1	pic	1	low
Tcell_stim_G3BP1_bp_wt	ACADM	TRUE	T cell	stimulation	bp	6	bp_pl_fanci	7	medium
HEK293T_heat_elF4A1_pl_wt	ACADM	TRUE	HEK293T	heatshock	pl	6	bp_pl_fanci	7	medium
HEK293T_hip_elF4A1_pl_wt	ACADM	TRUE	HEK293T	hippuristanol	pl	6	bp_pl_fanci	7	medium
HeLa_ars_G3BP1_fanci_wt	ACADM	TRUE	HeLa	arsenite	fanci	6	bp_pl_fanci	7	medium
HeLa_heat_G3BP1_fanci_wt	ACADM	TRUE	HeLa	heatshock	fanci	6	bp_pl_fanci	7	medium
HeLa_osm_G3BP1_fanci_wt	ACADM	TRUE	HeLa	osmosis	fanci	6	bp_pl_fanci	7	medium
HEK293T_sorb_G3BP1_pl_wt	ACADSB	TRUE	HEK293T	sorbitol	pl	7	bp_pl_fanci	8	medium
Tcell_stim_G3BP1_bp_wt	ACADSB	TRUE	T cell	stimulation	bp	7	bp_pl_fanci	8	medium
HeLa_ars_G3BP1_fanci_wt	ACADSB	TRUE	HeLa	arsenite	fanci	7	bp_pl_fanci	8	medium
HeLa_heat_G3BP1_fanci_wt	ACADSB	TRUE	HeLa	heatshock	fanci	7	bp_pl_fanci	8	medium
HeLa_osm_G3BP1_fanci_wt	ACADSB	TRUE	HeLa	osmosis	fanci	7	bp_pl_fanci	8	medium
HeLa_UV_G3BP1_fanci_wt	ACADSB	TRUE	HeLa	UV-light	fanci	7	bp_pl_fanci	8	medium
SKNBE_ars_G3BP1_bp_FUS-P525L	ACADSB	TRUE	SK-N-BE	arsenite	bp	7	bp_pl_fanci	8	medium
Tcell_stim_G3BP1_bp_wt	ACADVL	TRUE	T cell	stimulation	bp	2	bp	2	low
SMMC_ars_G3BP1_bp_wt	ACADVL	TRUE	SMMC-7721	arsenite	bp	2	bp	2	low
U2OS_ars_ΔEDC3_bp	ACAN	TRUE	U-2 OS	arsenite	bp	4	bp	4	medium
U2OS_ars_G3BP1_bp_wt	ACAN	TRUE	U-2 OS	arsenite	bp	4	bp	4	medium
U2OS_ars_PABPC1_bp_wt	ACAN	TRUE	U-2 OS	arsenite	bp	4	bp	4	medium
U2OS_virus_G3BP1_bp_wt	ACAN	TRUE	U-2 OS	virus	bp	4	bp	4	medium
Tcell_stim_G3BP1_bp_wt	ACAP1	TRUE	T cell	stimulation	bp	1	bp	1	low
HEK293T_sorb_G3BP1_pl_wt	ACAP2	TRUE	HEK293T	sorbitol	pl	5	bp_pl_fanci	6	medium
Tcell_stim_G3BP1_bp_wt	ACAP2	TRUE	T cell	stimulation	bp	5	bp_pl_fanci	6	medium
HeLa_ars_G3BP1_fanci_wt	ACAP2	TRUE	HeLa	arsenite	fanci	5	bp_pl_fanci	6	medium
HeLa_heat_G3BP1_fanci_wt	ACAP2	TRUE	HeLa	heatshock	fanci	5	bp_pl_fanci	6	medium
HeLa_UV_G3BP1_fanci_wt	ACAP2	TRUE	HeLa	UV-light	fanci	5	bp_pl_fanci	6	medium
Tcell_stim_G3BP1_bp_wt	ACAP3	TRUE	T cell	stimulation	bp	3	bp_pl	4	medium
HEK293T_heat_elF4A1_pl_wt	ACAP3	TRUE	HEK293T	heatshock	pl	3	bp_pl	4	medium
SMMC_ars_G3BP1_bp_wt	ACAP3	TRUE	SMMC-7721	arsenite	bp	3	bp_pl	4	medium
PC3_ars_G3BP1_pl_wt	ACAT1	TRUE	PC3	arsenite	bp	5	bp_pic_fanci	6	medium
HeLa_ars_G3BP1_pic_wt	ACAT1	TRUE	HeLa	arsenite	pic	5	bp_pic_fanci	6	medium
HeLa_ars_G3BP1_fanci_wt	ACAT1	TRUE	HeLa	arsenite	fanci	5	bp_pic_fanci	6	medium
HeLa_heat_G3BP1_fanci_wt	ACAT1	TRUE	HeLa	heatshock	fanci	5	bp_pic_fanci	6	medium
HeLa_osm_G3BP1_fanci_wt	ACAT1	TRUE	HeLa	osmosis	fanci	5	bp_pic_fanci	6	medium
Tcell_stim_G3BP1_bp_wt	ACBD3	TRUE	T cell	stimulation	bp	4	bp_fanci	5	medium
HeLa_ars_G3BP1_fanci_wt	ACBD3	TRUE	HeLa	arsenite	fanci	4	bp_fanci	5	medium
HeLa_osm_G3BP1_fanci_wt	ACBD3	TRUE	HeLa	osmosis	fanci	4	bp_fanci	5	medium
HeLa_UV_G3BP1_fanci_wt	ACBD3	TRUE	HeLa	UV-light	fanci	4	bp_fanci	5	medium
Tcell_stim_G3BP1_bp_wt	ACBD5	TRUE	T cell	stimulation	bp	5	bp_fanci	6	medium
HeLa_ars_G3BP1_fanci_wt	ACBD5	TRUE	HeLa	arsenite	fanci	5	bp_fanci	6	medium
HeLa_heat_G3BP1_fanci_wt	ACBD5	TRUE	HeLa	heatshock	fanci	5	bp_fanci	6	medium
HeLa_osm_G3BP1_fanci_wt	ACBD5	TRUE	HeLa	osmosis	fanci	5	bp_fanci	6	medium
HeLa_UV_G3BP1_fanci_wt	ACBD5	TRUE	HeLa	UV-light	fanci	5	bp_fanci	6	medium
U251_ars_TIAL1_bp_wt	ACBD6	TRUE	U251	arsenite	bp	1	bp	1	low
HEK293T_heat_elF4A1_pl_wt	ACD	TRUE	HEK293T	heatshock	pl	2	pl	2	low
HEK293T_hip_elF4A1_pl_wt	ACD	TRUE	HEK293T	hippuristanol	pl	2	pl	2	low
HeLa_UV_G3BP1_fanci_wt	ACER2	TRUE	HeLa	UV-light	fanci	2	bp_fanci	3	low
SKNBE_ars_G3BP1_bp_FUS-P525L	ACER2	TRUE	SK-N-BE	arsenite	bp	2	bp_fanci	3	low
HeLa_UV_G3BP1_fanci_wt	ACER3	TRUE	HeLa	UV-light	fanci	1	fanci	1	low
U2OS_ars_ΔEDC3_bp	ACHE	TRUE	U-2 OS	arsenite	bp	2	bp	2	low
U2OS_ars_PABPC1_bp_wt	ACHE	TRUE	U-2 OS	arsenite	bp	2	bp	2	low
Tcell_stim_G3BP1_bp_wt	ACIN1	TRUE	T cell	stimulation	bp	4	bp_pl_fanci	5	medium
HEK293T_heat_elF4A1_pl_wt	ACIN1	TRUE	HEK293T	heatshock	pl	4	bp_pl_fanci	5	medium
HEK293T_hip_elF4A1_pl_wt	ACIN1	TRUE	HEK293T	hippuristanol	pl	4	bp_pl_fanci	5	medium
HeLa_osm_G3BP1_fanci_wt	ACIN1	TRUE	HeLa	osmosis	fanci	4	bp_pl_fanci	5	medium
HeLa_ars_G3BP1_pic_wt	ACKR3	TRUE	HeLa	arsenite	pic	4	pic_fanci	5	medium
HeLa_ars_G3BP1_fanci_wt	ACKR3	TRUE	HeLa	arsenite	fanci	4	pic_fanci	5	medium
HeLa_heat_G3BP1_fanci_wt	ACKR3	TRUE	HeLa	heatshock	fanci	4	pic_fanci	5	medium
HeLa_osm_G3BP1_fanci_wt	ACKR3	TRUE	HeLa	osmosis	fanci	4	pic_fanci	5	medium
HEK293T_ars_G3BP1_pl_wt	ACLY	TRUE	HEK293T	arsenite	pl	6	bp_pl_fanci	7	medium
HEK293T_sorb_G3BP1_pl_wt	ACLY	TRUE	HEK293T	sorbitol	pl	6	bp_pl_fanci	7	medium
U2OS_ars_G3BP1_pl_wt	ACLY	TRUE	U-2 OS	arsenite	pl	6	bp_pl_fanci	7	medium
Tcell_stim_G3BP1_bp_wt	ACLY	TRUE	T cell	stimulation	bp	6	bp_pl_fanci	7	medium
U2OS_ars_ΔEDC3_bp	ACLY	TRUE	U-2 OS	arsenite	bp	6	bp_pl_fanci	7	medium
HeLa_osm_G3BP1_fanci_wt	ACLY	TRUE	HeLa	osmosis	fanci	6	bp_pl_fanci	7	medium
Tcell_stim_G3BP1_bp_wt	ACO1	TRUE	T cell	stimulation	bp	2	bp_fanci	3	low
HeLa_osm_G3BP1_fanci_wt	ACO1	TRUE	HeLa	osmosis	fanci	2	bp_fanci	3	low
PC3_ars_G3BP1_pl_wt	ACOD1	TRUE	PC3	arsenite	bp	1	bp	1	low
PC3_ars_G3BP1_pl_wt	ACOT7	TRUE	PC3	arsenite	bp	1	bp	1	low
HeLa_heat_G3BP1_fanci_wt	ACOT9	TRUE	HeLa	heatshock	fanci	1	fanci	1	low
U2OS_ars_G3BP1_pl_wt	ACOX1	TRUE	U-2 OS	arsenite	pl	6	bp_pl_fanci	7	medium
Tcell_stim_G3BP1_bp_wt	ACOX1	TRUE	T cell	stimulation	bp	6	bp_pl_fanci	7	medium
HeLa_ars_G3BP1_fanci_wt	ACOX1	TRUE	HeLa	arsenite	fanci	6	bp_pl_fanci	7	medium
HeLa_heat_G3BP1_fanci_wt	ACOX1	TRUE	HeLa	heatshock	fanci	6	bp_pl_fanci	7	medium
HeLa_osm_G3BP1_fanci_wt	ACOX1	TRUE	HeLa	osmosis	fanci	6	bp_pl_fanci	7	medium
HeLa_UV_G3BP1_fanci_wt	ACOX1	TRUE	HeLa	UV-light	fanci	6	bp_pl_fanci	7	medium
Tcell_stim_G3BP1_bp_wt	ACOX3	TRUE	T cell	stimulation	bp	1	bp	1	low
PC3_ars_G3BP1_pl_wt	ACP1	TRUE	PC3	arsenite	bp	3	bp_fanci	4	medium
HeLa_ars_G3BP1_fanci_wt	ACP1	TRUE	HeLa	arsenite	fanci	3	bp_fanci	4	medium
HeLa_osm_G3BP1_fanci_wt	ACP1	TRUE	HeLa	osmosis	fanci	3	bp_fanci	4	medium
HEK293T_heat_elF4A1_pl_wt	ACP2	TRUE	HEK293T	heatshock	pl	2	pl_fanci	3	low
HeLa_osm_G3BP1_fanci_wt	ACP2	TRUE	HeLa	osmosis	fanci	2	pl_fanci	3	low
Tcell_stim_G3BP1_bp_wt	ACP6	TRUE	T cell	stimulation	bp	1	bp	1	low
HEK293T_heat_elF4A1_pl_wt	ACR	TRUE	HEK293T	heatshock	pl	1	pl	1	low
Tcell_stim_G3BP1_bp_wt	ACSF2	TRUE	T cell	stimulation	bp	1	bp	1	low
Tcell_stim_G3BP1_bp_wt	ACSF3	TRUE	T cell	stimulation	bp	1	bp	1	low
HEK293T_sorb_G3BP1_pl_wt	ACSL1	TRUE	HEK293T	sorbitol	pl	5	bp_pl_fanci	6	medium
PC3_ars_G3BP1_pl_wt	ACSL1	TRUE	PC3	arsenite	bp	5	bp_pl_fanci	6	medium
HeLa_ars_G3BP1_fanci_wt	ACSL1	TRUE	HeLa	arsenite	fanci	5	bp_pl_fanci	6	medium
HeLa_heat_G3BP1_fanci_wt	ACSL1	TRUE	HeLa	heatshock	fanci	5	bp_pl_fanci	6	medium
HeLa_osm_G3BP1_fanci_wt	ACSL1	TRUE	HeLa	osmosis	fanci	5	bp_pl_fanci	6	medium
U2OS_ars_G3BP1_pl_wt	ACSL3	TRUE	U-2 OS	arsenite	pl	5	bp_pl_fanci	6	medium
Tcell_stim_G3BP1_bp_wt	ACSL3	TRUE	T cell	stimulation	bp	5	bp_pl_fanci	6	medium
HeLa_ars_G3BP1_fanci_wt	ACSL3	TRUE	HeLa	arsenite	fanci	5	bp_pl_fanci	6	medium
HeLa_osm_G3BP1_fanci_wt	ACSL3	TRUE	HeLa	osmosis	fanci	5	bp_pl_fanci	6	medium
HeLa_UV_G3BP1_fanci_wt	ACSL3	TRUE	HeLa	UV-light	fanci	5	bp_pl_fanci	6	medium
HEK293T_ars_G3BP1_pl_wt	ACSL4	TRUE	HEK293T	arsenite	pl	9	bp_pl_pic_fanci	10	high
HEK293T_sorb_G3BP1_pl_wt	ACSL4	TRUE	HEK293T	sorbitol	pl	9	bp_pl_pic_fanci	10	high
Tcell_stim_G3BP1_bp_wt	ACSL4	TRUE	T cell	stimulation	bp	9	bp_pl_pic_fanci	10	high
HeLa_ars_G3BP1_pic_wt	ACSL4	TRUE	HeLa	arsenite	pic	9	bp_pl_pic_fanci	10	high
HeLa_ars_G3BP1_fanci_wt	ACSL4	TRUE	HeLa	arsenite	fanci	9	bp_pl_pic_fanci	10	high
HeLa_heat_G3BP1_fanci_wt	ACSL4	TRUE	HeLa	heatshock	fanci	9	bp_pl_pic_fanci	10	high
HeLa_osm_G3BP1_fanci_wt	ACSL4	TRUE	HeLa	osmosis	fanci	9	bp_pl_pic_fanci	10	high
HeLa_UV_G3BP1_fanci_wt	ACSL4	TRUE	HeLa	UV-light	fanci	9	bp_pl_pic_fanci	10	high
SKNBE_ars_G3BP1_bp_FUS-P525L	ACSL4	TRUE	SK-N-BE	arsenite	bp	9	bp_pl_pic_fanci	10	high
Tcell_stim_G3BP1_bp_wt	ACSL5	TRUE	T cell	stimulation	bp	1	bp	1	low
HEK293T_heat_elF4A1_pl_wt	ACSM3	TRUE	HEK293T	heatshock	pl	1	pl	1	low
Tcell_stim_G3BP1_bp_wt	ACSS1	TRUE	T cell	stimulation	bp	1	bp	1	low
Tcell_stim_G3BP1_bp_wt	ACSS2	TRUE	T cell	stimulation	bp	1	bp	1	low
SKNBE_ars_G3BP1_bp_FUS	ACTA2-AS1	TRUE	SK-N-BE	arsenite	bp	1	bp	1	low
HeLa_osm_G3BP1_fanci_wt	ACTB	TRUE	HeLa	osmosis	fanci	1	fanci	1	low
HeLa_ars_G3BP1_fanci_wt	ACTG1	TRUE	HeLa	arsenite	fanci	2	fanci	2	low
HeLa_osm_G3BP1_fanci_wt	ACTG1	TRUE	HeLa	osmosis	fanci	2	fanci	2	low
SKNBE_ars_G3BP1_bp_FUS	ACTG1P1	TRUE	SK-N-BE	arsenite	bp	1	bp	1	low
HEK293T_heat_elF4A1_pl_wt	ACTG1P12	TRUE	HEK293T	heatshock	pl	1	pl	1	low
U2OS_ars_ΔEDC3_bp	ACTL10	TRUE	U-2 OS	arsenite	bp	1	bp	1	low
Tcell_stim_G3BP1_bp_wt	ACTL6A	TRUE	T cell	stimulation	bp	5	bp_fanci	6	medium
PC3_ars_G3BP1_pl_wt	ACTL6A	TRUE	PC3	arsenite	bp	5	bp_fanci	6	medium
HeLa_ars_G3BP1_fanci_wt	ACTL6A	TRUE	HeLa	arsenite	fanci	5	bp_fanci	6	medium
HeLa_heat_G3BP1_fanci_wt	ACTL6A	TRUE	HeLa	heatshock	fanci	5	bp_fanci	6	medium
HeLa_osm_G3BP1_fanci_wt	ACTL6A	TRUE	HeLa	osmosis	fanci	5	bp_fanci	6	medium
HeLa_osm_G3BP1_fanci_wt	ACTMAP	TRUE	HeLa	osmosis	fanci	1	fanci	1	low
Tcell_stim_G3BP1_bp_wt	ACTN1	TRUE	T cell	stimulation	bp	2	bp	2	low
U2OS_ars_ΔEDC3_bp	ACTN1	TRUE	U-2 OS	arsenite	bp	2	bp	2	low
U2OS_ars_ΔEDC3_bp	ACTN2	TRUE	U-2 OS	arsenite	bp	1	bp	1	low
Tcell_stim_G3BP1_bp_wt	ACTN4	TRUE	T cell	stimulation	bp	2	bp_pl	3	low
HEK293T_heat_elF4A1_pl_wt	ACTN4	TRUE	HEK293T	heatshock	pl	2	bp_pl	3	low
Tcell_stim_G3BP1_bp_wt	ACTR10	TRUE	T cell	stimulation	bp	4	bp_fanci	5	medium
HeLa_ars_G3BP1_fanci_wt	ACTR10	TRUE	HeLa	arsenite	fanci	4	bp_fanci	5	medium
HeLa_heat_G3BP1_fanci_wt	ACTR10	TRUE	HeLa	heatshock	fanci	4	bp_fanci	5	medium
HeLa_osm_G3BP1_fanci_wt	ACTR10	TRUE	HeLa	osmosis	fanci	4	bp_fanci	5	medium
HeLa_ars_G3BP1_fanci_wt	ACTR2	TRUE	HeLa	arsenite	fanci	2	fanci	2	low
HeLa_osm_G3BP1_fanci_wt	ACTR2	TRUE	HeLa	osmosis	fanci	2	fanci	2	low
HEK293T_sorb_G3BP1_pl_wt	ACTR3	TRUE	HEK293T	sorbitol	pl	7	bp_pl_fanci	8	medium
U2OS_ars_G3BP1_pl_wt	ACTR3	TRUE	U-2 OS	arsenite	pl	7	bp_pl_fanci	8	medium
Tcell_stim_G3BP1_bp_wt	ACTR3	TRUE	T cell	stimulation	bp	7	bp_pl_fanci	8	medium
HeLa_ars_G3BP1_fanci_wt	ACTR3	TRUE	HeLa	arsenite	fanci	7	bp_pl_fanci	8	medium
HeLa_heat_G3BP1_fanci_wt	ACTR3	TRUE	HeLa	heatshock	fanci	7	bp_pl_fanci	8	medium
HeLa_osm_G3BP1_fanci_wt	ACTR3	TRUE	HeLa	osmosis	fanci	7	bp_pl_fanci	8	medium
HeLa_UV_G3BP1_fanci_wt	ACTR3	TRUE	HeLa	UV-light	fanci	7	bp_pl_fanci	8	medium
PC3_ars_G3BP1_pl_wt	ACTR3B	TRUE	PC3	arsenite	bp	1	bp	1	low
Tcell_stim_G3BP1_bp_wt	ACTR5	TRUE	T cell	stimulation	bp	3	bp_fanci	4	medium
HeLa_ars_G3BP1_fanci_wt	ACTR5	TRUE	HeLa	arsenite	fanci	3	bp_fanci	4	medium
HeLa_heat_G3BP1_fanci_wt	ACTR5	TRUE	HeLa	heatshock	fanci	3	bp_fanci	4	medium
Tcell_stim_G3BP1_bp_wt	ACTR6	TRUE	T cell	stimulation	bp	2	bp	2	low
PC3_ars_G3BP1_pl_wt	ACTR6	TRUE	PC3	arsenite	bp	2	bp	2	low
U2OS_ars_G3BP1_pl_wt	ACTR8	TRUE	U-2 OS	arsenite	pl	5	bp_pl_fanci	6	medium
Tcell_stim_G3BP1_bp_wt	ACTR8	TRUE	T cell	stimulation	bp	5	bp_pl_fanci	6	medium
HeLa_ars_G3BP1_fanci_wt	ACTR8	TRUE	HeLa	arsenite	fanci	5	bp_pl_fanci	6	medium
HeLa_heat_G3BP1_fanci_wt	ACTR8	TRUE	HeLa	heatshock	fanci	5	bp_pl_fanci	6	medium
HeLa_osm_G3BP1_fanci_wt	ACTR8	TRUE	HeLa	osmosis	fanci	5	bp_pl_fanci	6	medium
PC3_ars_G3BP1_pl_wt	ACTRT3	TRUE	PC3	arsenite	bp	3	bp_fanci	4	medium
HeLa_ars_G3BP1_fanci_wt	ACTRT3	TRUE	HeLa	arsenite	fanci	3	bp_fanci	4	medium
HeLa_osm_G3BP1_fanci_wt	ACTRT3	TRUE	HeLa	osmosis	fanci	3	bp_fanci	4	medium
HeLa_UV_G3BP1_fanci_wt	ACVR1	TRUE	HeLa	UV-light	fanci	1	fanci	1	low
U2OS_ars_G3BP1_bp_wt	ACVR1B	TRUE	U-2 OS	arsenite	bp	4	bp_fanci	5	medium
U251_ars_G3BP1_bp_wt	ACVR1B	TRUE	U251	arsenite	bp	4	bp_fanci	5	medium
HeLa_ars_G3BP1_fanci_wt	ACVR1B	TRUE	HeLa	arsenite	fanci	4	bp_fanci	5	medium
HeLa_heat_G3BP1_fanci_wt	ACVR1B	TRUE	HeLa	heatshock	fanci	4	bp_fanci	5	medium
HeLa_ars_G3BP1_fanci_wt	ACVR2A	TRUE	HeLa	arsenite	fanci	3	bp_fanci	4	medium
HeLa_UV_G3BP1_fanci_wt	ACVR2A	TRUE	HeLa	UV-light	fanci	3	bp_fanci	4	medium
SKNBE_ars_G3BP1_bp_FUS-P525L	ACVR2A	TRUE	SK-N-BE	arsenite	bp	3	bp_fanci	4	medium
U2OS_ars_G3BP1_bp_wt	ACVR2B	TRUE	U-2 OS	arsenite	bp	13	bp_pic_fanci	14	high
U2OS_ars_PABPC1_bp_wt	ACVR2B	TRUE	U-2 OS	arsenite	bp	13	bp_pic_fanci	14	high
U2OS_sorb_PABPC1_bp_wt	ACVR2B	TRUE	U-2 OS	sorbitol	bp	13	bp_pic_fanci	14	high
U2OS_sorb_PABPC1_bp_G3BPko	ACVR2B	TRUE	U-2 OS	sorbitol	bp	13	bp_pic_fanci	14	high
U2OS_virus_G3BP1_bp_wt	ACVR2B	TRUE	U-2 OS	virus	bp	13	bp_pic_fanci	14	high
HeLa_ars_G3BP1_bp_wt	ACVR2B	TRUE	HeLa	arsenite	bp	13	bp_pic_fanci	14	high
HeLa_ars_G3BP1_pic_wt	ACVR2B	TRUE	HeLa	arsenite	pic	13	bp_pic_fanci	14	high
HeLa_ars_G3BP1_fanci_wt	ACVR2B	TRUE	HeLa	arsenite	fanci	13	bp_pic_fanci	14	high
HeLa_heat_G3BP1_fanci_wt	ACVR2B	TRUE	HeLa	heatshock	fanci	13	bp_pic_fanci	14	high
HeLa_osm_G3BP1_fanci_wt	ACVR2B	TRUE	HeLa	osmosis	fanci	13	bp_pic_fanci	14	high
SKNBE_ars_G3BP1_bp_FUS	ACVR2B	TRUE	SK-N-BE	arsenite	bp	13	bp_pic_fanci	14	high
SKNBE_ars_G3BP1_bp_FUS-P525L	ACVR2B	TRUE	SK-N-BE	arsenite	bp	13	bp_pic_fanci	14	high
SMMC_ars_G3BP1_bp_wt	ACVR2B	TRUE	SMMC-7721	arsenite	bp	13	bp_pic_fanci	14	high
HeLa_ars_G3BP1_pic_wt	ACYP2	TRUE	HeLa	arsenite	pic	2	pic_fanci	3	low
HeLa_UV_G3BP1_fanci_wt	ACYP2	TRUE	HeLa	UV-light	fanci	2	pic_fanci	3	low
U2OS_ars_G3BP1_bp_wt	AD000090.2	FALSE	U-2 OS	arsenite	bp	2	bp	2	low
U2OS_ars_PABPC1_bp_wt	AD000090.2	FALSE	U-2 OS	arsenite	bp	2	bp	2	low
U2OS_ars_G3BP1_pl_wt	ADAM10	TRUE	U-2 OS	arsenite	pl	6	bp_pl_fanci	7	medium
Tcell_stim_G3BP1_bp_wt	ADAM10	TRUE	T cell	stimulation	bp	6	bp_pl_fanci	7	medium
HeLa_ars_G3BP1_fanci_wt	ADAM10	TRUE	HeLa	arsenite	fanci	6	bp_pl_fanci	7	medium
HeLa_heat_G3BP1_fanci_wt	ADAM10	TRUE	HeLa	heatshock	fanci	6	bp_pl_fanci	7	medium
HeLa_UV_G3BP1_fanci_wt	ADAM10	TRUE	HeLa	UV-light	fanci	6	bp_pl_fanci	7	medium
SKNBE_ars_G3BP1_bp_FUS-P525L	ADAM10	TRUE	SK-N-BE	arsenite	bp	6	bp_pl_fanci	7	medium
U2OS_ars_ΔEDC3_bp	ADAM11	TRUE	U-2 OS	arsenite	bp	2	bp_pl	3	low
HEK293T_heat_elF4A1_pl_wt	ADAM11	TRUE	HEK293T	heatshock	pl	2	bp_pl	3	low
U2OS_ars_ΔEDC3_bp	ADAM12	TRUE	U-2 OS	arsenite	bp	2	bp	2	low
U251_ars_G3BP1_bp_wt	ADAM12	TRUE	U251	arsenite	bp	2	bp	2	low
HeLa_ars_G3BP1_pic_wt	ADAM15	TRUE	HeLa	arsenite	pic	1	pic	1	low
HeLa_ars_G3BP1_fanci_wt	ADAM17	TRUE	HeLa	arsenite	fanci	1	fanci	1	low
U2OS_ars_ΔEDC3_bp	ADAM19	TRUE	U-2 OS	arsenite	bp	7	bp	7	medium
U2OS_ars_G3BP1_bp_wt	ADAM19	TRUE	U-2 OS	arsenite	bp	7	bp	7	medium
U2OS_ars_PABPC1_bp_wt	ADAM19	TRUE	U-2 OS	arsenite	bp	7	bp	7	medium
U2OS_sorb_PABPC1_bp_wt	ADAM19	TRUE	U-2 OS	sorbitol	bp	7	bp	7	medium
U2OS_sorb_PABPC1_bp_G3BPko	ADAM19	TRUE	U-2 OS	sorbitol	bp	7	bp	7	medium
U2OS_sorb_G3BP1_bp_wt	ADAM19	TRUE	U-2 OS	sorbitol	bp	7	bp	7	medium
U2OS_virus_G3BP1_bp_wt	ADAM19	TRUE	U-2 OS	virus	bp	7	bp	7	medium
U2OS_virus_G3BP1_bp_wt	ADAM1A	TRUE	U-2 OS	virus	bp	1	bp	1	low
SKNBE_ars_G3BP1_bp_FUS	ADAM22	TRUE	SK-N-BE	arsenite	bp	1	bp	1	low
U2OS_ars_G3BP1_bp_wt	ADAM23	TRUE	U-2 OS	arsenite	bp	4	bp	4	medium
U2OS_sorb_PABPC1_bp_wt	ADAM23	TRUE	U-2 OS	sorbitol	bp	4	bp	4	medium
U2OS_sorb_PABPC1_bp_G3BPko	ADAM23	TRUE	U-2 OS	sorbitol	bp	4	bp	4	medium
U251_ars_G3BP1_bp_wt	ADAM23	TRUE	U251	arsenite	bp	4	bp	4	medium
HeLa_UV_G3BP1_fanci_wt	ADAM32	TRUE	HeLa	UV-light	fanci	1	fanci	1	low
U2OS_ars_ΔEDC3_bp	ADAM8	TRUE	U-2 OS	arsenite	bp	2	bp_pl	3	low
HEK293T_heat_elF4A1_pl_wt	ADAM8	TRUE	HEK293T	heatshock	pl	2	bp_pl	3	low
U2OS_ars_G3BP1_pl_wt	ADAM9	TRUE	U-2 OS	arsenite	pl	8	bp_pl_pic_fanci	9	medium
U2OS_ars_G3BP1_bp_wt	ADAM9	TRUE	U-2 OS	arsenite	bp	8	bp_pl_pic_fanci	9	medium
HeLa_ars_G3BP1_pic_wt	ADAM9	TRUE	HeLa	arsenite	pic	8	bp_pl_pic_fanci	9	medium
HeLa_ars_G3BP1_fanci_wt	ADAM9	TRUE	HeLa	arsenite	fanci	8	bp_pl_pic_fanci	9	medium
HeLa_heat_G3BP1_fanci_wt	ADAM9	TRUE	HeLa	heatshock	fanci	8	bp_pl_pic_fanci	9	medium
HeLa_osm_G3BP1_fanci_wt	ADAM9	TRUE	HeLa	osmosis	fanci	8	bp_pl_pic_fanci	9	medium
HeLa_UV_G3BP1_fanci_wt	ADAM9	TRUE	HeLa	UV-light	fanci	8	bp_pl_pic_fanci	9	medium
SKNBE_ars_G3BP1_bp_FUS-P525L	ADAM9	TRUE	SK-N-BE	arsenite	bp	8	bp_pl_pic_fanci	9	medium
HeLa_ars_G3BP1_fanci_wt	ADAMTS1	TRUE	HeLa	arsenite	fanci	2	fanci	2	low
HeLa_UV_G3BP1_fanci_wt	ADAMTS1	TRUE	HeLa	UV-light	fanci	2	fanci	2	low
U2OS_ars_ΔEDC3_bp	ADAMTS10	TRUE	U-2 OS	arsenite	bp	2	bp	2	low
SMMC_ars_G3BP1_bp_wt	ADAMTS10	TRUE	SMMC-7721	arsenite	bp	2	bp	2	low
U2OS_ars_ΔEDC3_bp	ADAMTS12	TRUE	U-2 OS	arsenite	bp	2	bp	2	low
U2OS_ars_G3BP1_bp_wt	ADAMTS12	TRUE	U-2 OS	arsenite	bp	2	bp	2	low
SKNBE_ars_G3BP1_bp_FUS	ADAMTS13	TRUE	SK-N-BE	arsenite	bp	1	bp	1	low
HEK293T_hip_elF4A1_pl_wt	ADAMTS14	TRUE	HEK293T	hippuristanol	pl	1	pl	1	low
U2OS_ars_ΔEDC3_bp	ADAMTS15	TRUE	U-2 OS	arsenite	bp	3	bp	3	low
U2OS_ars_G3BP1_bp_wt	ADAMTS15	TRUE	U-2 OS	arsenite	bp	3	bp	3	low
U2OS_virus_G3BP1_bp_wt	ADAMTS15	TRUE	U-2 OS	virus	bp	3	bp	3	low
U2OS_ars_ΔEDC3_bp	ADAMTS16	TRUE	U-2 OS	arsenite	bp	2	bp	2	low
PC3_ars_G3BP1_pl_wt	ADAMTS16	TRUE	PC3	arsenite	bp	2	bp	2	low
SKNBE_ars_G3BP1_bp_FUS	ADAMTS17	TRUE	SK-N-BE	arsenite	bp	1	bp	1	low
SKNBE_ars_G3BP1_bp_FUS	ADAMTS2	TRUE	SK-N-BE	arsenite	bp	1	bp	1	low
U2OS_ars_G3BP1_bp_wt	ADAMTS3	TRUE	U-2 OS	arsenite	bp	5	bp_fanci	6	medium
U2OS_ars_PABPC1_bp_wt	ADAMTS3	TRUE	U-2 OS	arsenite	bp	5	bp_fanci	6	medium
HeLa_UV_G3BP1_fanci_wt	ADAMTS3	TRUE	HeLa	UV-light	fanci	5	bp_fanci	6	medium
SKNBE_ars_G3BP1_bp_FUS	ADAMTS3	TRUE	SK-N-BE	arsenite	bp	5	bp_fanci	6	medium
SKNBE_ars_G3BP1_bp_FUS-P525L	ADAMTS3	TRUE	SK-N-BE	arsenite	bp	5	bp_fanci	6	medium
HeLa_ars_G3BP1_fanci_wt	ADAMTS5	TRUE	HeLa	arsenite	fanci	4	fanci	4	medium
HeLa_heat_G3BP1_fanci_wt	ADAMTS5	TRUE	HeLa	heatshock	fanci	4	fanci	4	medium
HeLa_osm_G3BP1_fanci_wt	ADAMTS5	TRUE	HeLa	osmosis	fanci	4	fanci	4	medium
HeLa_UV_G3BP1_fanci_wt	ADAMTS5	TRUE	HeLa	UV-light	fanci	4	fanci	4	medium
HeLa_UV_G3BP1_fanci_wt	ADAMTS6	TRUE	HeLa	UV-light	fanci	1	fanci	1	low
HeLa_ars_G3BP1_pic_wt	ADAMTS7	TRUE	HeLa	arsenite	pic	2	bp_pic	3	low
SKNBE_ars_G3BP1_bp_FUS	ADAMTS7	TRUE	SK-N-BE	arsenite	bp	2	bp_pic	3	low
SKNBE_ars_G3BP1_bp_FUS	ADAMTS7P3	TRUE	SK-N-BE	arsenite	bp	1	bp	1	low
U2OS_ars_ΔEDC3_bp	ADAMTS8	TRUE	U-2 OS	arsenite	bp	1	bp	1	low
SKNBE_ars_G3BP1_bp_FUS	ADAMTS9	TRUE	SK-N-BE	arsenite	bp	2	bp	2	low
SKNBE_ars_G3BP1_bp_FUS-P525L	ADAMTS9	TRUE	SK-N-BE	arsenite	bp	2	bp	2	low
HeLa_UV_G3BP1_fanci_wt	ADAMTSL1	TRUE	HeLa	UV-light	fanci	1	fanci	1	low
Tcell_stim_G3BP1_bp_wt	ADAMTSL3	TRUE	T cell	stimulation	bp	4	bp	4	medium
U2OS_ars_ΔEDC3_bp	ADAMTSL3	TRUE	U-2 OS	arsenite	bp	4	bp	4	medium
U2OS_ars_G3BP1_bp_wt	ADAMTSL3	TRUE	U-2 OS	arsenite	bp	4	bp	4	medium
U2OS_ars_PABPC1_bp_wt	ADAMTSL3	TRUE	U-2 OS	arsenite	bp	4	bp	4	medium
HeLa_heat_G3BP1_fanci_wt	ADAMTSL5	TRUE	HeLa	heatshock	fanci	2	fanci	2	low
HeLa_osm_G3BP1_fanci_wt	ADAMTSL5	TRUE	HeLa	osmosis	fanci	2	fanci	2	low
HEK293T_ars_G3BP1_pl_wt	ADAR	TRUE	HEK293T	arsenite	pl	14	bp_pl_fanci	15	high
HEK293T_sorb_G3BP1_pl_wt	ADAR	TRUE	HEK293T	sorbitol	pl	14	bp_pl_fanci	15	high
U2OS_ars_G3BP1_pl_wt	ADAR	TRUE	U-2 OS	arsenite	pl	14	bp_pl_fanci	15	high
Tcell_stim_G3BP1_bp_wt	ADAR	TRUE	T cell	stimulation	bp	14	bp_pl_fanci	15	high
U2OS_ars_G3BP1_bp_wt	ADAR	TRUE	U-2 OS	arsenite	bp	14	bp_pl_fanci	15	high
U2OS_ars_PABPC1_bp_wt	ADAR	TRUE	U-2 OS	arsenite	bp	14	bp_pl_fanci	15	high
U2OS_sorb_PABPC1_bp_wt	ADAR	TRUE	U-2 OS	sorbitol	bp	14	bp_pl_fanci	15	high
U2OS_sorb_PABPC1_bp_G3BPko	ADAR	TRUE	U-2 OS	sorbitol	bp	14	bp_pl_fanci	15	high
U2OS_virus_G3BP1_bp_wt	ADAR	TRUE	U-2 OS	virus	bp	14	bp_pl_fanci	15	high
HeLa_ars_G3BP1_bp_wt	ADAR	TRUE	HeLa	arsenite	bp	14	bp_pl_fanci	15	high
HeLa_ars_G3BP1_fanci_wt	ADAR	TRUE	HeLa	arsenite	fanci	14	bp_pl_fanci	15	high
HeLa_heat_G3BP1_fanci_wt	ADAR	TRUE	HeLa	heatshock	fanci	14	bp_pl_fanci	15	high
HeLa_osm_G3BP1_fanci_wt	ADAR	TRUE	HeLa	osmosis	fanci	14	bp_pl_fanci	15	high
SKNBE_ars_G3BP1_bp_FUS	ADAR	TRUE	SK-N-BE	arsenite	bp	14	bp_pl_fanci	15	high
Tcell_stim_G3BP1_bp_wt	ADARB1	TRUE	T cell	stimulation	bp	3	bp_pl	4	medium
HEK293T_heat_elF4A1_pl_wt	ADARB1	TRUE	HEK293T	heatshock	pl	3	bp_pl	4	medium
HEK293T_hip_elF4A1_pl_wt	ADARB1	TRUE	HEK293T	hippuristanol	pl	3	bp_pl	4	medium
U2OS_sorb_G3BP1_bp_wt	ADAT1	TRUE	U-2 OS	sorbitol	bp	2	bp	2	low
U251_ars_G3BP1_bp_wt	ADAT1	TRUE	U251	arsenite	bp	2	bp	2	low
HeLa_heat_G3BP1_fanci_wt	ADAT2	TRUE	HeLa	heatshock	fanci	1	fanci	1	low
U2OS_ars_ΔEDC3_bp	ADCY1	TRUE	U-2 OS	arsenite	bp	8	bp	8	medium
U2OS_ars_G3BP1_bp_wt	ADCY1	TRUE	U-2 OS	arsenite	bp	8	bp	8	medium
U2OS_ars_PABPC1_bp_wt	ADCY1	TRUE	U-2 OS	arsenite	bp	8	bp	8	medium
U2OS_sorb_PABPC1_bp_wt	ADCY1	TRUE	U-2 OS	sorbitol	bp	8	bp	8	medium
U2OS_sorb_G3BP1_bp_wt	ADCY1	TRUE	U-2 OS	sorbitol	bp	8	bp	8	medium
U2OS_virus_G3BP1_bp_wt	ADCY1	TRUE	U-2 OS	virus	bp	8	bp	8	medium
SKNBE_ars_G3BP1_bp_FUS	ADCY1	TRUE	SK-N-BE	arsenite	bp	8	bp	8	medium
SKNBE_ars_G3BP1_bp_FUS-P525L	ADCY1	TRUE	SK-N-BE	arsenite	bp	8	bp	8	medium
HeLa_UV_G3BP1_fanci_wt	ADCY10	TRUE	HeLa	UV-light	fanci	1	fanci	1	low
U2OS_virus_G3BP1_bp_wt	ADCY10P1	TRUE	U-2 OS	virus	bp	4	bp_fanci	5	medium
HeLa_heat_G3BP1_fanci_wt	ADCY10P1	TRUE	HeLa	heatshock	fanci	4	bp_fanci	5	medium
HeLa_UV_G3BP1_fanci_wt	ADCY10P1	TRUE	HeLa	UV-light	fanci	4	bp_fanci	5	medium
SKNBE_ars_G3BP1_bp_FUS-P525L	ADCY10P1	TRUE	SK-N-BE	arsenite	bp	4	bp_fanci	5	medium
U2OS_ars_G3BP1_bp_wt	ADCY3	TRUE	U-2 OS	arsenite	bp	3	bp	3	low
U2OS_ars_PABPC1_bp_wt	ADCY3	TRUE	U-2 OS	arsenite	bp	3	bp	3	low
SKNBE_ars_G3BP1_bp_FUS	ADCY3	TRUE	SK-N-BE	arsenite	bp	3	bp	3	low
U2OS_virus_G3BP1_bp_wt	ADCY5	TRUE	U-2 OS	virus	bp	2	bp	2	low
SKNBE_ars_G3BP1_bp_FUS	ADCY5	TRUE	SK-N-BE	arsenite	bp	2	bp	2	low
U2OS_ars_ΔEDC3_bp	ADCY6	TRUE	U-2 OS	arsenite	bp	7	bp_pic	8	medium
U2OS_ars_G3BP1_bp_wt	ADCY6	TRUE	U-2 OS	arsenite	bp	7	bp_pic	8	medium
U2OS_ars_PABPC1_bp_wt	ADCY6	TRUE	U-2 OS	arsenite	bp	7	bp_pic	8	medium
U2OS_virus_G3BP1_bp_wt	ADCY6	TRUE	U-2 OS	virus	bp	7	bp_pic	8	medium
HeLa_ars_G3BP1_pic_wt	ADCY6	TRUE	HeLa	arsenite	pic	7	bp_pic	8	medium
SKNBE_ars_G3BP1_bp_FUS	ADCY6	TRUE	SK-N-BE	arsenite	bp	7	bp_pic	8	medium
SMMC_ars_G3BP1_bp_wt	ADCY6	TRUE	SMMC-7721	arsenite	bp	7	bp_pic	8	medium
Tcell_stim_G3BP1_bp_wt	ADCY7	TRUE	T cell	stimulation	bp	4	bp	4	medium
U2OS_ars_PABPC1_bp_wt	ADCY7	TRUE	U-2 OS	arsenite	bp	4	bp	4	medium
U2OS_virus_G3BP1_bp_wt	ADCY7	TRUE	U-2 OS	virus	bp	4	bp	4	medium
SKNBE_ars_G3BP1_bp_FUS	ADCY7	TRUE	SK-N-BE	arsenite	bp	4	bp	4	medium
Tcell_stim_G3BP1_bp_wt	ADCY9	TRUE	T cell	stimulation	bp	6	bp	6	medium
U2OS_ars_ΔEDC3_bp	ADCY9	TRUE	U-2 OS	arsenite	bp	6	bp	6	medium
U2OS_ars_G3BP1_bp_wt	ADCY9	TRUE	U-2 OS	arsenite	bp	6	bp	6	medium
U2OS_ars_PABPC1_bp_wt	ADCY9	TRUE	U-2 OS	arsenite	bp	6	bp	6	medium
SKNBE_ars_G3BP1_bp_FUS	ADCY9	TRUE	SK-N-BE	arsenite	bp	6	bp	6	medium
SMMC_ars_G3BP1_bp_wt	ADCY9	TRUE	SMMC-7721	arsenite	bp	6	bp	6	medium
U2OS_virus_G3BP1_bp_wt	ADCYAP1R1	TRUE	U-2 OS	virus	bp	2	bp	2	low
SKNBE_ars_G3BP1_bp_FUS	ADCYAP1R1	TRUE	SK-N-BE	arsenite	bp	2	bp	2	low
HEK293T_sorb_G3BP1_pl_wt	ADD1	TRUE	HEK293T	sorbitol	pl	5	bp_pl_fanci	6	medium
Tcell_stim_G3BP1_bp_wt	ADD1	TRUE	T cell	stimulation	bp	5	bp_pl_fanci	6	medium
U2OS_ars_ΔEDC3_bp	ADD1	TRUE	U-2 OS	arsenite	bp	5	bp_pl_fanci	6	medium
HeLa_ars_G3BP1_fanci_wt	ADD1	TRUE	HeLa	arsenite	fanci	5	bp_pl_fanci	6	medium
HeLa_osm_G3BP1_fanci_wt	ADD1	TRUE	HeLa	osmosis	fanci	5	bp_pl_fanci	6	medium
SKNBE_ars_G3BP1_bp_FUS	ADD2	TRUE	SK-N-BE	arsenite	bp	1	bp	1	low
U2OS_ars_G3BP1_pl_wt	ADD3	TRUE	U-2 OS	arsenite	pl	3	bp_pl_fanci	4	medium
Tcell_stim_G3BP1_bp_wt	ADD3	TRUE	T cell	stimulation	bp	3	bp_pl_fanci	4	medium
HeLa_UV_G3BP1_fanci_wt	ADD3	TRUE	HeLa	UV-light	fanci	3	bp_pl_fanci	4	medium
HEK293T_heat_elF4A1_pl_wt	ADGRA1	TRUE	HEK293T	heatshock	pl	1	pl	1	low
U2OS_ars_ΔEDC3_bp	ADGRA2	TRUE	U-2 OS	arsenite	bp	2	bp	2	low
SKNBE_ars_G3BP1_bp_FUS	ADGRA2	TRUE	SK-N-BE	arsenite	bp	2	bp	2	low
HEK293T_ars_G3BP1_pl_wt	ADGRA3	TRUE	HEK293T	arsenite	pl	10	bp_pl_fanci	11	high
U2OS_ars_G3BP1_pl_wt	ADGRA3	TRUE	U-2 OS	arsenite	pl	10	bp_pl_fanci	11	high
Tcell_stim_G3BP1_bp_wt	ADGRA3	TRUE	T cell	stimulation	bp	10	bp_pl_fanci	11	high
U2OS_ars_ΔEDC3_bp	ADGRA3	TRUE	U-2 OS	arsenite	bp	10	bp_pl_fanci	11	high
HeLa_ars_G3BP1_fanci_wt	ADGRA3	TRUE	HeLa	arsenite	fanci	10	bp_pl_fanci	11	high
HeLa_heat_G3BP1_fanci_wt	ADGRA3	TRUE	HeLa	heatshock	fanci	10	bp_pl_fanci	11	high
SKNBE_ars_G3BP1_bp_FUS	ADGRA3	TRUE	SK-N-BE	arsenite	bp	10	bp_pl_fanci	11	high
U2OS_ars_G3BP1_bp_wt	ADGRA3	TRUE	U-2 OS	arsenite	bp	10	bp_pl_fanci	11	high
U2OS_ars_PABPC1_bp_wt	ADGRA3	TRUE	U-2 OS	arsenite	bp	10	bp_pl_fanci	11	high
U2OS_sorb_PABPC1_bp_G3BPko	ADGRA3	TRUE	U-2 OS	sorbitol	bp	10	bp_pl_fanci	11	high
U2OS_ars_ΔEDC3_bp	ADGRB2	TRUE	U-2 OS	arsenite	bp	5	bp_pl	6	medium
HEK293T_heat_elF4A1_pl_wt	ADGRB2	TRUE	HEK293T	heatshock	pl	5	bp_pl	6	medium
SKNBE_ars_G3BP1_bp_FUS	ADGRB2	TRUE	SK-N-BE	arsenite	bp	5	bp_pl	6	medium
SMMC_ars_G3BP1_bp_wt	ADGRB2	TRUE	SMMC-7721	arsenite	bp	5	bp_pl	6	medium
U2OS_ars_PABPC1_bp_wt	ADGRB2	TRUE	U-2 OS	arsenite	bp	5	bp_pl	6	medium
U2OS_ars_G3BP1_bp_wt	ADGRD1	TRUE	U-2 OS	arsenite	bp	2	bp	2	low
U2OS_ars_PABPC1_bp_wt	ADGRD1	TRUE	U-2 OS	arsenite	bp	2	bp	2	low
U2OS_ars_ΔEDC3_bp	ADGRG1	TRUE	U-2 OS	arsenite	bp	4	bp	4	medium
U2OS_virus_G3BP1_bp_wt	ADGRG1	TRUE	U-2 OS	virus	bp	4	bp	4	medium
U2OS_sorb_PABPC1_bp_wt	ADGRG1	TRUE	U-2 OS	sorbitol	bp	4	bp	4	medium
U2OS_sorb_PABPC1_bp_G3BPko	ADGRG1	TRUE	U-2 OS	sorbitol	bp	4	bp	4	medium
HeLa_ars_G3BP1_fanci_wt	ADGRG2	TRUE	HeLa	arsenite	fanci	3	bp_fanci	4	medium
HeLa_heat_G3BP1_fanci_wt	ADGRG2	TRUE	HeLa	heatshock	fanci	3	bp_fanci	4	medium
SKNBE_ars_G3BP1_bp_FUS-P525L	ADGRG2	TRUE	SK-N-BE	arsenite	bp	3	bp_fanci	4	medium
HeLa_ars_G3BP1_fanci_wt	ADGRG6	TRUE	HeLa	arsenite	fanci	4	bp_fanci	5	medium
HeLa_heat_G3BP1_fanci_wt	ADGRG6	TRUE	HeLa	heatshock	fanci	4	bp_fanci	5	medium
HeLa_osm_G3BP1_fanci_wt	ADGRG6	TRUE	HeLa	osmosis	fanci	4	bp_fanci	5	medium
U251_ars_G3BP1_bp_wt	ADGRG6	TRUE	U251	arsenite	bp	4	bp_fanci	5	medium
U2OS_ars_ΔEDC3_bp	ADGRL1	TRUE	U-2 OS	arsenite	bp	11	bp_pl_fanci	12	high
U2OS_virus_G3BP1_bp_wt	ADGRL1	TRUE	U-2 OS	virus	bp	11	bp_pl_fanci	12	high
HEK293T_heat_elF4A1_pl_wt	ADGRL1	TRUE	HEK293T	heatshock	pl	11	bp_pl_fanci	12	high
HeLa_osm_G3BP1_fanci_wt	ADGRL1	TRUE	HeLa	osmosis	fanci	11	bp_pl_fanci	12	high
SKNBE_ars_G3BP1_bp_FUS	ADGRL1	TRUE	SK-N-BE	arsenite	bp	11	bp_pl_fanci	12	high
SMMC_ars_G3BP1_bp_wt	ADGRL1	TRUE	SMMC-7721	arsenite	bp	11	bp_pl_fanci	12	high
U2OS_ars_G3BP1_bp_wt	ADGRL1	TRUE	U-2 OS	arsenite	bp	11	bp_pl_fanci	12	high
U2OS_ars_PABPC1_bp_wt	ADGRL1	TRUE	U-2 OS	arsenite	bp	11	bp_pl_fanci	12	high
U2OS_sorb_PABPC1_bp_wt	ADGRL1	TRUE	U-2 OS	sorbitol	bp	11	bp_pl_fanci	12	high
U2OS_sorb_PABPC1_bp_G3BPko	ADGRL1	TRUE	U-2 OS	sorbitol	bp	11	bp_pl_fanci	12	high
U2OS_sorb_G3BP1_bp_wt	ADGRL1	TRUE	U-2 OS	sorbitol	bp	11	bp_pl_fanci	12	high
U2OS_ars_G3BP1_pl_wt	ADGRL2	TRUE	U-2 OS	arsenite	pl	7	bp_pl	8	medium
U2OS_virus_G3BP1_bp_wt	ADGRL2	TRUE	U-2 OS	virus	bp	7	bp_pl	8	medium
SKNBE_ars_G3BP1_bp_FUS	ADGRL2	TRUE	SK-N-BE	arsenite	bp	7	bp_pl	8	medium
SKNBE_ars_G3BP1_bp_FUS-P525L	ADGRL2	TRUE	SK-N-BE	arsenite	bp	7	bp_pl	8	medium
U2OS_ars_G3BP1_bp_wt	ADGRL2	TRUE	U-2 OS	arsenite	bp	7	bp_pl	8	medium
U2OS_sorb_PABPC1_bp_G3BPko	ADGRL2	TRUE	U-2 OS	sorbitol	bp	7	bp_pl	8	medium
U251_ars_G3BP1_bp_wt	ADGRL2	TRUE	U251	arsenite	bp	7	bp_pl	8	medium
U2OS_virus_G3BP1_bp_wt	ADGRL3	TRUE	U-2 OS	virus	bp	2	bp	2	low
U251_ars_G3BP1_bp_wt	ADGRL3	TRUE	U251	arsenite	bp	2	bp	2	low
HeLa_UV_G3BP1_fanci_wt	ADGRV1	TRUE	HeLa	UV-light	fanci	2	bp_fanci	3	low
U2OS_ars_PABPC1_bp_wt	ADGRV1	TRUE	U-2 OS	arsenite	bp	2	bp_fanci	3	low
Tcell_stim_G3BP1_bp_wt	ADH5	TRUE	T cell	stimulation	bp	4	bp_fanci	5	medium
HeLa_ars_G3BP1_fanci_wt	ADH5	TRUE	HeLa	arsenite	fanci	4	bp_fanci	5	medium
HeLa_heat_G3BP1_fanci_wt	ADH5	TRUE	HeLa	heatshock	fanci	4	bp_fanci	5	medium
HeLa_osm_G3BP1_fanci_wt	ADH5	TRUE	HeLa	osmosis	fanci	4	bp_fanci	5	medium
U251_ars_G3BP1_bp_wt	ADIPOR1	TRUE	U251	arsenite	bp	3	bp_fanci	4	medium
HeLa_heat_G3BP1_fanci_wt	ADIPOR1	TRUE	HeLa	heatshock	fanci	3	bp_fanci	4	medium
HeLa_osm_G3BP1_fanci_wt	ADIPOR1	TRUE	HeLa	osmosis	fanci	3	bp_fanci	4	medium
U2OS_ars_G3BP1_pl_wt	ADIPOR2	TRUE	U-2 OS	arsenite	pl	5	bp_pl_fanci	6	medium
U251_ars_G3BP1_bp_wt	ADIPOR2	TRUE	U251	arsenite	bp	5	bp_pl_fanci	6	medium
HeLa_ars_G3BP1_fanci_wt	ADIPOR2	TRUE	HeLa	arsenite	fanci	5	bp_pl_fanci	6	medium
HeLa_heat_G3BP1_fanci_wt	ADIPOR2	TRUE	HeLa	heatshock	fanci	5	bp_pl_fanci	6	medium
HeLa_osm_G3BP1_fanci_wt	ADIPOR2	TRUE	HeLa	osmosis	fanci	5	bp_pl_fanci	6	medium
U2OS_ars_ΔEDC3_bp	ADIRF-AS1	TRUE	U-2 OS	arsenite	bp	3	bp	3	low
U2OS_ars_G3BP1_bp_wt	ADIRF-AS1	TRUE	U-2 OS	arsenite	bp	3	bp	3	low
SMMC_ars_G3BP1_bp_wt	ADIRF-AS1	TRUE	SMMC-7721	arsenite	bp	3	bp	3	low
PC3_ars_G3BP1_pl_wt	ADK	TRUE	PC3	arsenite	bp	1	bp	1	low
HeLa_ars_G3BP1_fanci_wt	ADM	TRUE	HeLa	arsenite	fanci	2	fanci	2	low
HeLa_UV_G3BP1_fanci_wt	ADM	TRUE	HeLa	UV-light	fanci	2	fanci	2	low
U2OS_ars_ΔEDC3_bp	ADM2	TRUE	U-2 OS	arsenite	bp	6	bp_fanci	7	medium
U2OS_ars_G3BP1_bp_wt	ADM2	TRUE	U-2 OS	arsenite	bp	6	bp_fanci	7	medium
HeLa_ars_G3BP1_bp_wt	ADM2	TRUE	HeLa	arsenite	bp	6	bp_fanci	7	medium
HeLa_osm_G3BP1_fanci_wt	ADM2	TRUE	HeLa	osmosis	fanci	6	bp_fanci	7	medium
HeLa_UV_G3BP1_fanci_wt	ADM2	TRUE	HeLa	UV-light	fanci	6	bp_fanci	7	medium
SMMC_ars_G3BP1_bp_wt	ADM2	TRUE	SMMC-7721	arsenite	bp	6	bp_fanci	7	medium
HEK293T_ars_G3BP1_pl_wt	ADNP	TRUE	HEK293T	arsenite	pl	17	bp_pl_fanci	18	high
HEK293T_sorb_G3BP1_pl_wt	ADNP	TRUE	HEK293T	sorbitol	pl	17	bp_pl_fanci	18	high
U2OS_ars_G3BP1_pl_wt	ADNP	TRUE	U-2 OS	arsenite	pl	17	bp_pl_fanci	18	high
Tcell_stim_G3BP1_bp_wt	ADNP	TRUE	T cell	stimulation	bp	17	bp_pl_fanci	18	high
U2OS_ars_G3BP1_bp_wt	ADNP	TRUE	U-2 OS	arsenite	bp	17	bp_pl_fanci	18	high
U2OS_ars_PABPC1_bp_wt	ADNP	TRUE	U-2 OS	arsenite	bp	17	bp_pl_fanci	18	high
U2OS_sorb_PABPC1_bp_wt	ADNP	TRUE	U-2 OS	sorbitol	bp	17	bp_pl_fanci	18	high
U2OS_sorb_PABPC1_bp_G3BPko	ADNP	TRUE	U-2 OS	sorbitol	bp	17	bp_pl_fanci	18	high
U2OS_sorb_G3BP1_bp_wt	ADNP	TRUE	U-2 OS	sorbitol	bp	17	bp_pl_fanci	18	high
U2OS_virus_G3BP1_bp_wt	ADNP	TRUE	U-2 OS	virus	bp	17	bp_pl_fanci	18	high
HeLa_ars_G3BP1_bp_wt	ADNP	TRUE	HeLa	arsenite	bp	17	bp_pl_fanci	18	high
U251_ars_G3BP1_bp_wt	ADNP	TRUE	U251	arsenite	bp	17	bp_pl_fanci	18	high
HeLa_ars_G3BP1_fanci_wt	ADNP	TRUE	HeLa	arsenite	fanci	17	bp_pl_fanci	18	high
HeLa_heat_G3BP1_fanci_wt	ADNP	TRUE	HeLa	heatshock	fanci	17	bp_pl_fanci	18	high
HeLa_osm_G3BP1_fanci_wt	ADNP	TRUE	HeLa	osmosis	fanci	17	bp_pl_fanci	18	high
HeLa_UV_G3BP1_fanci_wt	ADNP	TRUE	HeLa	UV-light	fanci	17	bp_pl_fanci	18	high
SKNBE_ars_G3BP1_bp_FUS	ADNP	TRUE	SK-N-BE	arsenite	bp	17	bp_pl_fanci	18	high
HEK293T_sorb_G3BP1_pl_wt	ADNP2	TRUE	HEK293T	sorbitol	pl	15	bp_pl_pic_fanci	16	high
U2OS_ars_G3BP1_pl_wt	ADNP2	TRUE	U-2 OS	arsenite	pl	15	bp_pl_pic_fanci	16	high
Tcell_stim_G3BP1_bp_wt	ADNP2	TRUE	T cell	stimulation	bp	15	bp_pl_pic_fanci	16	high
U2OS_ars_G3BP1_bp_wt	ADNP2	TRUE	U-2 OS	arsenite	bp	15	bp_pl_pic_fanci	16	high
U2OS_ars_PABPC1_bp_wt	ADNP2	TRUE	U-2 OS	arsenite	bp	15	bp_pl_pic_fanci	16	high
U2OS_sorb_PABPC1_bp_wt	ADNP2	TRUE	U-2 OS	sorbitol	bp	15	bp_pl_pic_fanci	16	high
U2OS_sorb_PABPC1_bp_G3BPko	ADNP2	TRUE	U-2 OS	sorbitol	bp	15	bp_pl_pic_fanci	16	high
U2OS_virus_G3BP1_bp_wt	ADNP2	TRUE	U-2 OS	virus	bp	15	bp_pl_pic_fanci	16	high
HeLa_ars_G3BP1_pic_wt	ADNP2	TRUE	HeLa	arsenite	pic	15	bp_pl_pic_fanci	16	high
U251_ars_G3BP1_bp_wt	ADNP2	TRUE	U251	arsenite	bp	15	bp_pl_pic_fanci	16	high
HeLa_ars_G3BP1_fanci_wt	ADNP2	TRUE	HeLa	arsenite	fanci	15	bp_pl_pic_fanci	16	high
HeLa_heat_G3BP1_fanci_wt	ADNP2	TRUE	HeLa	heatshock	fanci	15	bp_pl_pic_fanci	16	high
HeLa_osm_G3BP1_fanci_wt	ADNP2	TRUE	HeLa	osmosis	fanci	15	bp_pl_pic_fanci	16	high
HeLa_UV_G3BP1_fanci_wt	ADNP2	TRUE	HeLa	UV-light	fanci	15	bp_pl_pic_fanci	16	high
SKNBE_ars_G3BP1_bp_FUS	ADNP2	TRUE	SK-N-BE	arsenite	bp	15	bp_pl_pic_fanci	16	high
HeLa_ars_G3BP1_fanci_wt	ADO	TRUE	HeLa	arsenite	fanci	4	fanci	4	medium
HeLa_heat_G3BP1_fanci_wt	ADO	TRUE	HeLa	heatshock	fanci	4	fanci	4	medium
HeLa_osm_G3BP1_fanci_wt	ADO	TRUE	HeLa	osmosis	fanci	4	fanci	4	medium
HeLa_UV_G3BP1_fanci_wt	ADO	TRUE	HeLa	UV-light	fanci	4	fanci	4	medium
U2OS_ars_ΔEDC3_bp	ADORA1	TRUE	U-2 OS	arsenite	bp	1	bp	1	low
HeLa_ars_G3BP1_fanci_wt	ADPGK	TRUE	HeLa	arsenite	fanci	2	fanci	2	low
HeLa_heat_G3BP1_fanci_wt	ADPGK	TRUE	HeLa	heatshock	fanci	2	fanci	2	low
U2OS_ars_ΔEDC3_bp	ADPRHL1	TRUE	U-2 OS	arsenite	bp	3	bp_pl	4	medium
PC3_ars_G3BP1_pl_wt	ADPRHL1	TRUE	PC3	arsenite	bp	3	bp_pl	4	medium
HEK293T_heat_elF4A1_pl_wt	ADPRHL1	TRUE	HEK293T	heatshock	pl	3	bp_pl	4	medium
PC3_ars_G3BP1_pl_wt	ADPRM	TRUE	PC3	arsenite	bp	1	bp	1	low
HeLa_heat_G3BP1_fanci_wt	ADPRS	TRUE	HeLa	heatshock	fanci	1	fanci	1	low
U251_ars_G3BP1_bp_wt	ADRA1B	TRUE	U251	arsenite	bp	1	bp	1	low
HeLa_ars_G3BP1_pic_wt	ADRA2A	TRUE	HeLa	arsenite	pic	2	bp_pic	3	low
SKNBE_ars_G3BP1_bp_FUS	ADRA2A	TRUE	SK-N-BE	arsenite	bp	2	bp_pic	3	low
SMMC_ars_G3BP1_bp_wt	ADRA2B	TRUE	SMMC-7721	arsenite	bp	1	bp	1	low
U2OS_ars_ΔEDC3_bp	ADRA2C	TRUE	U-2 OS	arsenite	bp	2	bp	2	low
U2OS_ars_PABPC1_bp_wt	ADRA2C	TRUE	U-2 OS	arsenite	bp	2	bp	2	low
HeLa_heat_G3BP1_fanci_wt	ADRB1	TRUE	HeLa	heatshock	fanci	2	fanci	2	low
HeLa_osm_G3BP1_fanci_wt	ADRB1	TRUE	HeLa	osmosis	fanci	2	fanci	2	low
HeLa_ars_G3BP1_fanci_wt	ADRB2	TRUE	HeLa	arsenite	fanci	3	fanci	3	low
HeLa_heat_G3BP1_fanci_wt	ADRB2	TRUE	HeLa	heatshock	fanci	3	fanci	3	low
HeLa_osm_G3BP1_fanci_wt	ADRB2	TRUE	HeLa	osmosis	fanci	3	fanci	3	low
HeLa_ars_G3BP1_pic_wt	ADRM1	TRUE	HeLa	arsenite	pic	1	pic	1	low
Tcell_stim_G3BP1_bp_wt	ADSL	TRUE	T cell	stimulation	bp	1	bp	1	low
HEK293T_hip_elF4A1_pl_wt	ADSS1	TRUE	HEK293T	hippuristanol	pl	1	pl	1	low
HeLa_ars_G3BP1_fanci_wt	ADSS2	TRUE	HeLa	arsenite	fanci	2	fanci	2	low
HeLa_heat_G3BP1_fanci_wt	ADSS2	TRUE	HeLa	heatshock	fanci	2	fanci	2	low
Tcell_stim_G3BP1_bp_wt	AEBP1	TRUE	T cell	stimulation	bp	2	bp	2	low
U2OS_ars_ΔEDC3_bp	AEBP1	TRUE	U-2 OS	arsenite	bp	2	bp	2	low
Tcell_stim_G3BP1_bp_wt	AEBP2	TRUE	T cell	stimulation	bp	10	bp_fanci	11	high
U2OS_ars_G3BP1_bp_wt	AEBP2	TRUE	U-2 OS	arsenite	bp	10	bp_fanci	11	high
U2OS_sorb_PABPC1_bp_wt	AEBP2	TRUE	U-2 OS	sorbitol	bp	10	bp_fanci	11	high
U2OS_sorb_PABPC1_bp_G3BPko	AEBP2	TRUE	U-2 OS	sorbitol	bp	10	bp_fanci	11	high
U2OS_sorb_G3BP1_bp_wt	AEBP2	TRUE	U-2 OS	sorbitol	bp	10	bp_fanci	11	high
U2OS_virus_G3BP1_bp_wt	AEBP2	TRUE	U-2 OS	virus	bp	10	bp_fanci	11	high
HeLa_ars_G3BP1_fanci_wt	AEBP2	TRUE	HeLa	arsenite	fanci	10	bp_fanci	11	high
HeLa_UV_G3BP1_fanci_wt	AEBP2	TRUE	HeLa	UV-light	fanci	10	bp_fanci	11	high
SKNBE_ars_G3BP1_bp_FUS-P525L	AEBP2	TRUE	SK-N-BE	arsenite	bp	10	bp_fanci	11	high
SMMC_ars_G3BP1_bp_wt	AEBP2	TRUE	SMMC-7721	arsenite	bp	10	bp_fanci	11	high
HeLa_heat_G3BP1_fanci_wt	AEN	TRUE	HeLa	heatshock	fanci	2	fanci	2	low
HeLa_osm_G3BP1_fanci_wt	AEN	TRUE	HeLa	osmosis	fanci	2	fanci	2	low
U2OS_ars_G3BP1_bp_wt	AF013593.1	FALSE	U-2 OS	arsenite	bp	1	bp	1	low
SKNBE_ars_G3BP1_bp_FUS	AF038458.3	FALSE	SK-N-BE	arsenite	bp	1	bp	1	low
Tcell_stim_G3BP1_bp_wt	AF117829.1	FALSE	T cell	stimulation	bp	1	bp	1	low
SKNBE_ars_G3BP1_bp_FUS-P525L	AF127577.4	FALSE	SK-N-BE	arsenite	bp	1	bp	1	low
SMMC_ars_G3BP1_bp_wt	AF129075.4	FALSE	SMMC-7721	arsenite	bp	1	bp	1	low
SKNBE_ars_G3BP1_bp_FUS	AF131215.2	FALSE	SK-N-BE	arsenite	bp	2	bp	2	low
SKNBE_ars_G3BP1_bp_FUS-P525L	AF131215.2	FALSE	SK-N-BE	arsenite	bp	2	bp	2	low
SKNBE_ars_G3BP1_bp_FUS	AF131215.4	FALSE	SK-N-BE	arsenite	bp	2	bp	2	low
SKNBE_ars_G3BP1_bp_FUS-P525L	AF131215.4	FALSE	SK-N-BE	arsenite	bp	2	bp	2	low
Tcell_stim_G3BP1_bp_wt	AF131215.5	FALSE	T cell	stimulation	bp	3	bp	3	low
SKNBE_ars_G3BP1_bp_FUS	AF131215.5	FALSE	SK-N-BE	arsenite	bp	3	bp	3	low
SKNBE_ars_G3BP1_bp_FUS-P525L	AF131215.5	FALSE	SK-N-BE	arsenite	bp	3	bp	3	low
SKNBE_ars_G3BP1_bp_FUS	AF131215.6	FALSE	SK-N-BE	arsenite	bp	1	bp	1	low
SMMC_ars_G3BP1_bp_wt	AF201337.1	FALSE	SMMC-7721	arsenite	bp	1	bp	1	low
HeLa_ars_G3BP1_bp_wt	AF213884.3	FALSE	HeLa	arsenite	bp	1	bp	1	low
SKNBE_ars_G3BP1_bp_FUS	AF241728.1	FALSE	SK-N-BE	arsenite	bp	1	bp	1	low
Tcell_stim_G3BP1_bp_wt	AFAP1	TRUE	T cell	stimulation	bp	10	bp_fanci	11	high
U2OS_ars_G3BP1_bp_wt	AFAP1	TRUE	U-2 OS	arsenite	bp	10	bp_fanci	11	high
U2OS_ars_PABPC1_bp_wt	AFAP1	TRUE	U-2 OS	arsenite	bp	10	bp_fanci	11	high
U2OS_sorb_PABPC1_bp_wt	AFAP1	TRUE	U-2 OS	sorbitol	bp	10	bp_fanci	11	high
HeLa_ars_G3BP1_bp_wt	AFAP1	TRUE	HeLa	arsenite	bp	10	bp_fanci	11	high
HeLa_ars_G3BP1_fanci_wt	AFAP1	TRUE	HeLa	arsenite	fanci	10	bp_fanci	11	high
HeLa_heat_G3BP1_fanci_wt	AFAP1	TRUE	HeLa	heatshock	fanci	10	bp_fanci	11	high
HeLa_UV_G3BP1_fanci_wt	AFAP1	TRUE	HeLa	UV-light	fanci	10	bp_fanci	11	high
SKNBE_ars_G3BP1_bp_FUS	AFAP1	TRUE	SK-N-BE	arsenite	bp	10	bp_fanci	11	high
SKNBE_ars_G3BP1_bp_FUS-P525L	AFAP1	TRUE	SK-N-BE	arsenite	bp	10	bp_fanci	11	high
HEK293T_hip_elF4A1_pl_wt	AFAP1-AS1	TRUE	HEK293T	hippuristanol	pl	1	pl	1	low
HeLa_heat_G3BP1_fanci_wt	AFAP1L1	TRUE	HeLa	heatshock	fanci	1	fanci	1	low
HEK293T_ars_G3BP1_pl_wt	AFDN	TRUE	HEK293T	arsenite	pl	15	bp_pl_fanci	16	high
Tcell_stim_G3BP1_bp_wt	AFDN	TRUE	T cell	stimulation	bp	15	bp_pl_fanci	16	high
U2OS_virus_G3BP1_bp_wt	AFDN	TRUE	U-2 OS	virus	bp	15	bp_pl_fanci	16	high
HeLa_ars_G3BP1_bp_wt	AFDN	TRUE	HeLa	arsenite	bp	15	bp_pl_fanci	16	high
HeLa_ars_G3BP1_fanci_wt	AFDN	TRUE	HeLa	arsenite	fanci	15	bp_pl_fanci	16	high
HeLa_heat_G3BP1_fanci_wt	AFDN	TRUE	HeLa	heatshock	fanci	15	bp_pl_fanci	16	high
HeLa_osm_G3BP1_fanci_wt	AFDN	TRUE	HeLa	osmosis	fanci	15	bp_pl_fanci	16	high
HeLa_UV_G3BP1_fanci_wt	AFDN	TRUE	HeLa	UV-light	fanci	15	bp_pl_fanci	16	high
SKNBE_ars_G3BP1_bp_FUS	AFDN	TRUE	SK-N-BE	arsenite	bp	15	bp_pl_fanci	16	high
SKNBE_ars_G3BP1_bp_FUS-P525L	AFDN	TRUE	SK-N-BE	arsenite	bp	15	bp_pl_fanci	16	high
SMMC_ars_G3BP1_bp_wt	AFDN	TRUE	SMMC-7721	arsenite	bp	15	bp_pl_fanci	16	high
U2OS_ars_G3BP1_bp_wt	AFDN	TRUE	U-2 OS	arsenite	bp	15	bp_pl_fanci	16	high
U2OS_ars_PABPC1_bp_wt	AFDN	TRUE	U-2 OS	arsenite	bp	15	bp_pl_fanci	16	high
U2OS_sorb_PABPC1_bp_wt	AFDN	TRUE	U-2 OS	sorbitol	bp	15	bp_pl_fanci	16	high
U2OS_sorb_PABPC1_bp_G3BPko	AFDN	TRUE	U-2 OS	sorbitol	bp	15	bp_pl_fanci	16	high
HEK293T_hip_elF4A1_pl_wt	AFDN-DT	TRUE	HEK293T	hippuristanol	pl	1	pl	1	low
Tcell_stim_G3BP1_bp_wt	AFF1	TRUE	T cell	stimulation	bp	9	bp_fanci	10	high
U2OS_ars_G3BP1_bp_wt	AFF1	TRUE	U-2 OS	arsenite	bp	9	bp_fanci	10	high
U2OS_sorb_PABPC1_bp_G3BPko	AFF1	TRUE	U-2 OS	sorbitol	bp	9	bp_fanci	10	high
U2OS_sorb_G3BP1_bp_wt	AFF1	TRUE	U-2 OS	sorbitol	bp	9	bp_fanci	10	high
U2OS_virus_G3BP1_bp_wt	AFF1	TRUE	U-2 OS	virus	bp	9	bp_fanci	10	high
HeLa_ars_G3BP1_fanci_wt	AFF1	TRUE	HeLa	arsenite	fanci	9	bp_fanci	10	high
HeLa_heat_G3BP1_fanci_wt	AFF1	TRUE	HeLa	heatshock	fanci	9	bp_fanci	10	high
HeLa_UV_G3BP1_fanci_wt	AFF1	TRUE	HeLa	UV-light	fanci	9	bp_fanci	10	high
SKNBE_ars_G3BP1_bp_FUS-P525L	AFF1	TRUE	SK-N-BE	arsenite	bp	9	bp_fanci	10	high
U2OS_ars_ΔEDC3_bp	AFF3	TRUE	U-2 OS	arsenite	bp	2	bp	2	low
U2OS_ars_G3BP1_bp_wt	AFF3	TRUE	U-2 OS	arsenite	bp	2	bp	2	low
Tcell_stim_G3BP1_bp_wt	AFF4	TRUE	T cell	stimulation	bp	14	bp_fanci	15	high
U2OS_ars_G3BP1_bp_wt	AFF4	TRUE	U-2 OS	arsenite	bp	14	bp_fanci	15	high
U2OS_ars_PABPC1_bp_wt	AFF4	TRUE	U-2 OS	arsenite	bp	14	bp_fanci	15	high
U2OS_sorb_PABPC1_bp_wt	AFF4	TRUE	U-2 OS	sorbitol	bp	14	bp_fanci	15	high
U2OS_sorb_PABPC1_bp_G3BPko	AFF4	TRUE	U-2 OS	sorbitol	bp	14	bp_fanci	15	high
U2OS_sorb_G3BP1_bp_wt	AFF4	TRUE	U-2 OS	sorbitol	bp	14	bp_fanci	15	high
U2OS_virus_G3BP1_bp_wt	AFF4	TRUE	U-2 OS	virus	bp	14	bp_fanci	15	high
U251_ars_G3BP1_bp_wt	AFF4	TRUE	U251	arsenite	bp	14	bp_fanci	15	high
HeLa_ars_G3BP1_fanci_wt	AFF4	TRUE	HeLa	arsenite	fanci	14	bp_fanci	15	high
HeLa_heat_G3BP1_fanci_wt	AFF4	TRUE	HeLa	heatshock	fanci	14	bp_fanci	15	high
HeLa_osm_G3BP1_fanci_wt	AFF4	TRUE	HeLa	osmosis	fanci	14	bp_fanci	15	high
HeLa_UV_G3BP1_fanci_wt	AFF4	TRUE	HeLa	UV-light	fanci	14	bp_fanci	15	high
SKNBE_ars_G3BP1_bp_FUS	AFF4	TRUE	SK-N-BE	arsenite	bp	14	bp_fanci	15	high
SKNBE_ars_G3BP1_bp_FUS-P525L	AFF4	TRUE	SK-N-BE	arsenite	bp	14	bp_fanci	15	high
HeLa_UV_G3BP1_fanci_wt	AFG1L	TRUE	HeLa	UV-light	fanci	2	bp_fanci	3	low
PC3_ars_G3BP1_pl_wt	AFG1L	TRUE	PC3	arsenite	bp	2	bp_fanci	3	low
Tcell_stim_G3BP1_bp_wt	AFG2A	TRUE	T cell	stimulation	bp	3	bp_fanci	4	medium
HeLa_UV_G3BP1_fanci_wt	AFG2A	TRUE	HeLa	UV-light	fanci	3	bp_fanci	4	medium
SKNBE_ars_G3BP1_bp_FUS-P525L	AFG2A	TRUE	SK-N-BE	arsenite	bp	3	bp_fanci	4	medium
Tcell_stim_G3BP1_bp_wt	AFG2B	TRUE	T cell	stimulation	bp	3	bp_pic_fanci	4	medium
HeLa_ars_G3BP1_pic_wt	AFG2B	TRUE	HeLa	arsenite	pic	3	bp_pic_fanci	4	medium
HeLa_ars_G3BP1_fanci_wt	AFG2B	TRUE	HeLa	arsenite	fanci	3	bp_pic_fanci	4	medium
HeLa_heat_G3BP1_fanci_wt	AFG3L1P	TRUE	HeLa	heatshock	fanci	3	bp_fanci	4	medium
SKNBE_ars_G3BP1_bp_FUS	AFG3L1P	TRUE	SK-N-BE	arsenite	bp	3	bp_fanci	4	medium
SMMC_ars_G3BP1_bp_wt	AFG3L1P	TRUE	SMMC-7721	arsenite	bp	3	bp_fanci	4	medium
HEK293T_ars_G3BP1_pl_wt	AFG3L2	TRUE	HEK293T	arsenite	pl	7	bp_pl_fanci	8	medium
U2OS_ars_G3BP1_pl_wt	AFG3L2	TRUE	U-2 OS	arsenite	pl	7	bp_pl_fanci	8	medium
Tcell_stim_G3BP1_bp_wt	AFG3L2	TRUE	T cell	stimulation	bp	7	bp_pl_fanci	8	medium
HeLa_ars_G3BP1_fanci_wt	AFG3L2	TRUE	HeLa	arsenite	fanci	7	bp_pl_fanci	8	medium
HeLa_heat_G3BP1_fanci_wt	AFG3L2	TRUE	HeLa	heatshock	fanci	7	bp_pl_fanci	8	medium
HeLa_osm_G3BP1_fanci_wt	AFG3L2	TRUE	HeLa	osmosis	fanci	7	bp_pl_fanci	8	medium
SMMC_ars_G3BP1_bp_wt	AFG3L2	TRUE	SMMC-7721	arsenite	bp	7	bp_pl_fanci	8	medium
Tcell_stim_G3BP1_bp_wt	AFTPH	TRUE	T cell	stimulation	bp	8	bp_fanci	9	medium
U2OS_ars_G3BP1_bp_wt	AFTPH	TRUE	U-2 OS	arsenite	bp	8	bp_fanci	9	medium
U2OS_virus_G3BP1_bp_wt	AFTPH	TRUE	U-2 OS	virus	bp	8	bp_fanci	9	medium
HeLa_ars_G3BP1_fanci_wt	AFTPH	TRUE	HeLa	arsenite	fanci	8	bp_fanci	9	medium
HeLa_heat_G3BP1_fanci_wt	AFTPH	TRUE	HeLa	heatshock	fanci	8	bp_fanci	9	medium
HeLa_osm_G3BP1_fanci_wt	AFTPH	TRUE	HeLa	osmosis	fanci	8	bp_fanci	9	medium
HeLa_UV_G3BP1_fanci_wt	AFTPH	TRUE	HeLa	UV-light	fanci	8	bp_fanci	9	medium
SKNBE_ars_G3BP1_bp_FUS-P525L	AFTPH	TRUE	SK-N-BE	arsenite	bp	8	bp_fanci	9	medium
HeLa_ars_G3BP1_fanci_wt	AGA	TRUE	HeLa	arsenite	fanci	2	fanci	2	low
HeLa_osm_G3BP1_fanci_wt	AGA	TRUE	HeLa	osmosis	fanci	2	fanci	2	low
HeLa_UV_G3BP1_fanci_wt	AGA-DT	TRUE	HeLa	UV-light	fanci	1	fanci	1	low
U2OS_ars_ΔEDC3_bp	AGAP1	TRUE	U-2 OS	arsenite	bp	7	bp	7	medium
U2OS_ars_G3BP1_bp_wt	AGAP1	TRUE	U-2 OS	arsenite	bp	7	bp	7	medium
U2OS_ars_PABPC1_bp_wt	AGAP1	TRUE	U-2 OS	arsenite	bp	7	bp	7	medium
U2OS_virus_G3BP1_bp_wt	AGAP1	TRUE	U-2 OS	virus	bp	7	bp	7	medium
SKNBE_ars_G3BP1_bp_FUS	AGAP1	TRUE	SK-N-BE	arsenite	bp	7	bp	7	medium
SKNBE_ars_G3BP1_bp_FUS-P525L	AGAP1	TRUE	SK-N-BE	arsenite	bp	7	bp	7	medium
SMMC_ars_G3BP1_bp_wt	AGAP1	TRUE	SMMC-7721	arsenite	bp	7	bp	7	medium
SMMC_ars_G3BP1_bp_wt	AGAP1-IT1	TRUE	SMMC-7721	arsenite	bp	1	bp	1	low
Tcell_stim_G3BP1_bp_wt	AGAP2	TRUE	T cell	stimulation	bp	2	bp	2	low
U2OS_ars_G3BP1_bp_wt	AGAP2	TRUE	U-2 OS	arsenite	bp	2	bp	2	low
HeLa_osm_G3BP1_fanci_wt	AGAP2-AS1	TRUE	HeLa	osmosis	fanci	1	fanci	1	low
Tcell_stim_G3BP1_bp_wt	AGAP3	TRUE	T cell	stimulation	bp	4	bp_pl	5	medium
HEK293T_heat_elF4A1_pl_wt	AGAP3	TRUE	HEK293T	heatshock	pl	4	bp_pl	5	medium
SKNBE_ars_G3BP1_bp_FUS	AGAP3	TRUE	SK-N-BE	arsenite	bp	4	bp_pl	5	medium
SMMC_ars_G3BP1_bp_wt	AGAP3	TRUE	SMMC-7721	arsenite	bp	4	bp_pl	5	medium
U2OS_virus_G3BP1_bp_wt	AGAP5	TRUE	U-2 OS	virus	bp	1	bp	1	low
U2OS_ars_ΔEDC3_bp	AGAP7P	TRUE	U-2 OS	arsenite	bp	1	bp	1	low
U251_ars_G3BP1_bp_wt	AGBL5	TRUE	U251	arsenite	bp	2	bp_fanci	3	low
HeLa_osm_G3BP1_fanci_wt	AGBL5	TRUE	HeLa	osmosis	fanci	2	bp_fanci	3	low
SMMC_ars_G3BP1_bp_wt	AGER	TRUE	SMMC-7721	arsenite	bp	1	bp	1	low
HEK293T_sorb_G3BP1_pl_wt	AGFG1	TRUE	HEK293T	sorbitol	pl	4	pl_fanci	5	medium
HeLa_ars_G3BP1_fanci_wt	AGFG1	TRUE	HeLa	arsenite	fanci	4	pl_fanci	5	medium
HeLa_heat_G3BP1_fanci_wt	AGFG1	TRUE	HeLa	heatshock	fanci	4	pl_fanci	5	medium
HeLa_UV_G3BP1_fanci_wt	AGFG1	TRUE	HeLa	UV-light	fanci	4	pl_fanci	5	medium
Tcell_stim_G3BP1_bp_wt	AGFG2	TRUE	T cell	stimulation	bp	1	bp	1	low
HeLa_ars_G3BP1_fanci_wt	AGGF1	TRUE	HeLa	arsenite	fanci	3	fanci	3	low
HeLa_heat_G3BP1_fanci_wt	AGGF1	TRUE	HeLa	heatshock	fanci	3	fanci	3	low
HeLa_osm_G3BP1_fanci_wt	AGGF1	TRUE	HeLa	osmosis	fanci	3	fanci	3	low
Tcell_stim_G3BP1_bp_wt	AGK	TRUE	T cell	stimulation	bp	1	bp	1	low
Tcell_stim_G3BP1_bp_wt	AGL	TRUE	T cell	stimulation	bp	9	bp_fanci	10	high
U2OS_ars_G3BP1_bp_wt	AGL	TRUE	U-2 OS	arsenite	bp	9	bp_fanci	10	high
U2OS_ars_PABPC1_bp_wt	AGL	TRUE	U-2 OS	arsenite	bp	9	bp_fanci	10	high
HeLa_ars_G3BP1_fanci_wt	AGL	TRUE	HeLa	arsenite	fanci	9	bp_fanci	10	high
HeLa_heat_G3BP1_fanci_wt	AGL	TRUE	HeLa	heatshock	fanci	9	bp_fanci	10	high
HeLa_osm_G3BP1_fanci_wt	AGL	TRUE	HeLa	osmosis	fanci	9	bp_fanci	10	high
HeLa_UV_G3BP1_fanci_wt	AGL	TRUE	HeLa	UV-light	fanci	9	bp_fanci	10	high
SKNBE_ars_G3BP1_bp_FUS	AGL	TRUE	SK-N-BE	arsenite	bp	9	bp_fanci	10	high
SKNBE_ars_G3BP1_bp_FUS-P525L	AGL	TRUE	SK-N-BE	arsenite	bp	9	bp_fanci	10	high
U2OS_ars_ΔEDC3_bp	AGO1	TRUE	U-2 OS	arsenite	bp	14	bp_fanci	15	high
U2OS_ars_G3BP1_bp_wt	AGO1	TRUE	U-2 OS	arsenite	bp	14	bp_fanci	15	high
U2OS_ars_PABPC1_bp_wt	AGO1	TRUE	U-2 OS	arsenite	bp	14	bp_fanci	15	high
U2OS_sorb_PABPC1_bp_wt	AGO1	TRUE	U-2 OS	sorbitol	bp	14	bp_fanci	15	high
U2OS_sorb_PABPC1_bp_G3BPko	AGO1	TRUE	U-2 OS	sorbitol	bp	14	bp_fanci	15	high
U2OS_sorb_G3BP1_bp_wt	AGO1	TRUE	U-2 OS	sorbitol	bp	14	bp_fanci	15	high
U2OS_virus_G3BP1_bp_wt	AGO1	TRUE	U-2 OS	virus	bp	14	bp_fanci	15	high
HeLa_ars_G3BP1_fanci_wt	AGO1	TRUE	HeLa	arsenite	fanci	14	bp_fanci	15	high
HeLa_heat_G3BP1_fanci_wt	AGO1	TRUE	HeLa	heatshock	fanci	14	bp_fanci	15	high
HeLa_osm_G3BP1_fanci_wt	AGO1	TRUE	HeLa	osmosis	fanci	14	bp_fanci	15	high
HeLa_UV_G3BP1_fanci_wt	AGO1	TRUE	HeLa	UV-light	fanci	14	bp_fanci	15	high
SKNBE_ars_G3BP1_bp_FUS	AGO1	TRUE	SK-N-BE	arsenite	bp	14	bp_fanci	15	high
SMMC_ars_G3BP1_bp_wt	AGO1	TRUE	SMMC-7721	arsenite	bp	14	bp_fanci	15	high
U251_ars_G3BP1_bp_wt	AGO1	TRUE	U251	arsenite	bp	14	bp_fanci	15	high
Tcell_stim_G3BP1_bp_wt	AGO2	TRUE	T cell	stimulation	bp	13	bp_fanci	14	high
U2OS_ars_G3BP1_bp_wt	AGO2	TRUE	U-2 OS	arsenite	bp	13	bp_fanci	14	high
U2OS_ars_PABPC1_bp_wt	AGO2	TRUE	U-2 OS	arsenite	bp	13	bp_fanci	14	high
HeLa_ars_G3BP1_fanci_wt	AGO2	TRUE	HeLa	arsenite	fanci	13	bp_fanci	14	high
HeLa_heat_G3BP1_fanci_wt	AGO2	TRUE	HeLa	heatshock	fanci	13	bp_fanci	14	high
HeLa_osm_G3BP1_fanci_wt	AGO2	TRUE	HeLa	osmosis	fanci	13	bp_fanci	14	high
HeLa_UV_G3BP1_fanci_wt	AGO2	TRUE	HeLa	UV-light	fanci	13	bp_fanci	14	high
SKNBE_ars_G3BP1_bp_FUS	AGO2	TRUE	SK-N-BE	arsenite	bp	13	bp_fanci	14	high
SKNBE_ars_G3BP1_bp_FUS-P525L	AGO2	TRUE	SK-N-BE	arsenite	bp	13	bp_fanci	14	high
U2OS_sorb_PABPC1_bp_wt	AGO2	TRUE	U-2 OS	sorbitol	bp	13	bp_fanci	14	high
U2OS_sorb_PABPC1_bp_G3BPko	AGO2	TRUE	U-2 OS	sorbitol	bp	13	bp_fanci	14	high
U2OS_sorb_G3BP1_bp_wt	AGO2	TRUE	U-2 OS	sorbitol	bp	13	bp_fanci	14	high
U251_ars_G3BP1_bp_wt	AGO2	TRUE	U251	arsenite	bp	13	bp_fanci	14	high
Tcell_stim_G3BP1_bp_wt	AGO3	TRUE	T cell	stimulation	bp	5	bp_fanci	6	medium
PC3_ars_G3BP1_pl_wt	AGO3	TRUE	PC3	arsenite	bp	5	bp_fanci	6	medium
HeLa_heat_G3BP1_fanci_wt	AGO3	TRUE	HeLa	heatshock	fanci	5	bp_fanci	6	medium
HeLa_UV_G3BP1_fanci_wt	AGO3	TRUE	HeLa	UV-light	fanci	5	bp_fanci	6	medium
SKNBE_ars_G3BP1_bp_FUS-P525L	AGO3	TRUE	SK-N-BE	arsenite	bp	5	bp_fanci	6	medium
U2OS_virus_G3BP1_bp_wt	AGO4	TRUE	U-2 OS	virus	bp	6	bp_fanci	7	medium
HeLa_ars_G3BP1_fanci_wt	AGO4	TRUE	HeLa	arsenite	fanci	6	bp_fanci	7	medium
HeLa_heat_G3BP1_fanci_wt	AGO4	TRUE	HeLa	heatshock	fanci	6	bp_fanci	7	medium
HeLa_UV_G3BP1_fanci_wt	AGO4	TRUE	HeLa	UV-light	fanci	6	bp_fanci	7	medium
SKNBE_ars_G3BP1_bp_FUS	AGO4	TRUE	SK-N-BE	arsenite	bp	6	bp_fanci	7	medium
SKNBE_ars_G3BP1_bp_FUS-P525L	AGO4	TRUE	SK-N-BE	arsenite	bp	6	bp_fanci	7	medium
HeLa_ars_G3BP1_pic_wt	AGPAT1	TRUE	HeLa	arsenite	pic	3	bp_pic_fanci	4	medium
U251_ars_G3BP1_bp_wt	AGPAT1	TRUE	U251	arsenite	bp	3	bp_pic_fanci	4	medium
HeLa_osm_G3BP1_fanci_wt	AGPAT1	TRUE	HeLa	osmosis	fanci	3	bp_pic_fanci	4	medium
HEK293T_heat_elF4A1_pl_wt	AGPAT3	TRUE	HEK293T	heatshock	pl	4	bp_pl	5	medium
U251_ars_G3BP1_bp_wt	AGPAT3	TRUE	U251	arsenite	bp	4	bp_pl	5	medium
SKNBE_ars_G3BP1_bp_FUS	AGPAT3	TRUE	SK-N-BE	arsenite	bp	4	bp_pl	5	medium
SMMC_ars_G3BP1_bp_wt	AGPAT3	TRUE	SMMC-7721	arsenite	bp	4	bp_pl	5	medium
HEK293T_sorb_G3BP1_pl_wt	AGPAT5	TRUE	HEK293T	sorbitol	pl	6	bp_pl_fanci	7	medium
U2OS_ars_G3BP1_pl_wt	AGPAT5	TRUE	U-2 OS	arsenite	pl	6	bp_pl_fanci	7	medium
Tcell_stim_G3BP1_bp_wt	AGPAT5	TRUE	T cell	stimulation	bp	6	bp_pl_fanci	7	medium
HeLa_ars_G3BP1_fanci_wt	AGPAT5	TRUE	HeLa	arsenite	fanci	6	bp_pl_fanci	7	medium
HeLa_heat_G3BP1_fanci_wt	AGPAT5	TRUE	HeLa	heatshock	fanci	6	bp_pl_fanci	7	medium
HeLa_osm_G3BP1_fanci_wt	AGPAT5	TRUE	HeLa	osmosis	fanci	6	bp_pl_fanci	7	medium
Tcell_stim_G3BP1_bp_wt	AGPS	TRUE	T cell	stimulation	bp	3	bp_fanci	4	medium
HeLa_heat_G3BP1_fanci_wt	AGPS	TRUE	HeLa	heatshock	fanci	3	bp_fanci	4	medium
HeLa_UV_G3BP1_fanci_wt	AGPS	TRUE	HeLa	UV-light	fanci	3	bp_fanci	4	medium
HeLa_ars_G3BP1_fanci_wt	AGR2	TRUE	HeLa	arsenite	fanci	1	fanci	1	low
U2OS_ars_ΔEDC3_bp	AGRN	TRUE	U-2 OS	arsenite	bp	5	bp	5	medium
U2OS_ars_PABPC1_bp_wt	AGRN	TRUE	U-2 OS	arsenite	bp	5	bp	5	medium
SKNBE_ars_G3BP1_bp_FUS	AGRN	TRUE	SK-N-BE	arsenite	bp	5	bp	5	medium
SKNBE_ars_G3BP1_bp_FUS-P525L	AGRN	TRUE	SK-N-BE	arsenite	bp	5	bp	5	medium
SMMC_ars_G3BP1_bp_wt	AGRN	TRUE	SMMC-7721	arsenite	bp	5	bp	5	medium
U251_ars_G3BP1_bp_wt	AGTPBP1	TRUE	U251	arsenite	bp	2	bp_fanci	3	low
HeLa_UV_G3BP1_fanci_wt	AGTPBP1	TRUE	HeLa	UV-light	fanci	2	bp_fanci	3	low
U251_ars_G3BP1_bp_wt	AGTRAP	TRUE	U251	arsenite	bp	1	bp	1	low
HEK293T_sorb_G3BP1_pl_wt	AHCTF1	TRUE	HEK293T	sorbitol	pl	10	bp_pl_fanci	11	high
Tcell_stim_G3BP1_bp_wt	AHCTF1	TRUE	T cell	stimulation	bp	10	bp_pl_fanci	11	high
U2OS_ars_G3BP1_bp_wt	AHCTF1	TRUE	U-2 OS	arsenite	bp	10	bp_pl_fanci	11	high
U2OS_ars_PABPC1_bp_wt	AHCTF1	TRUE	U-2 OS	arsenite	bp	10	bp_pl_fanci	11	high
U2OS_virus_G3BP1_bp_wt	AHCTF1	TRUE	U-2 OS	virus	bp	10	bp_pl_fanci	11	high
HeLa_ars_G3BP1_fanci_wt	AHCTF1	TRUE	HeLa	arsenite	fanci	10	bp_pl_fanci	11	high
HeLa_osm_G3BP1_fanci_wt	AHCTF1	TRUE	HeLa	osmosis	fanci	10	bp_pl_fanci	11	high
HeLa_UV_G3BP1_fanci_wt	AHCTF1	TRUE	HeLa	UV-light	fanci	10	bp_pl_fanci	11	high
SKNBE_ars_G3BP1_bp_FUS	AHCTF1	TRUE	SK-N-BE	arsenite	bp	10	bp_pl_fanci	11	high
SKNBE_ars_G3BP1_bp_FUS-P525L	AHCTF1	TRUE	SK-N-BE	arsenite	bp	10	bp_pl_fanci	11	high
U2OS_ars_G3BP1_bp_wt	AHCTF1P1	TRUE	U-2 OS	arsenite	bp	7	bp_pic_fanci	8	medium
U2OS_ars_PABPC1_bp_wt	AHCTF1P1	TRUE	U-2 OS	arsenite	bp	7	bp_pic_fanci	8	medium
HeLa_ars_G3BP1_pic_wt	AHCTF1P1	TRUE	HeLa	arsenite	pic	7	bp_pic_fanci	8	medium
HeLa_ars_G3BP1_fanci_wt	AHCTF1P1	TRUE	HeLa	arsenite	fanci	7	bp_pic_fanci	8	medium
HeLa_heat_G3BP1_fanci_wt	AHCTF1P1	TRUE	HeLa	heatshock	fanci	7	bp_pic_fanci	8	medium
HeLa_osm_G3BP1_fanci_wt	AHCTF1P1	TRUE	HeLa	osmosis	fanci	7	bp_pic_fanci	8	medium
HeLa_UV_G3BP1_fanci_wt	AHCTF1P1	TRUE	HeLa	UV-light	fanci	7	bp_pic_fanci	8	medium
PC3_ars_G3BP1_pl_wt	AHCY	TRUE	PC3	arsenite	bp	1	bp	1	low
HeLa_osm_G3BP1_fanci_wt	AHCYL1	TRUE	HeLa	osmosis	fanci	1	fanci	1	low
HeLa_UV_G3BP1_fanci_wt	AHCYL2	TRUE	HeLa	UV-light	fanci	1	fanci	1	low
U2OS_ars_G3BP1_bp_wt	AHDC1	TRUE	U-2 OS	arsenite	bp	6	bp	6	medium
U2OS_virus_G3BP1_bp_wt	AHDC1	TRUE	U-2 OS	virus	bp	6	bp	6	medium
HeLa_ars_G3BP1_bp_wt	AHDC1	TRUE	HeLa	arsenite	bp	6	bp	6	medium
SKNBE_ars_G3BP1_bp_FUS	AHDC1	TRUE	SK-N-BE	arsenite	bp	6	bp	6	medium
SKNBE_ars_G3BP1_bp_FUS-P525L	AHDC1	TRUE	SK-N-BE	arsenite	bp	6	bp	6	medium
SMMC_ars_G3BP1_bp_wt	AHDC1	TRUE	SMMC-7721	arsenite	bp	6	bp	6	medium
Tcell_stim_G3BP1_bp_wt	AHI1	TRUE	T cell	stimulation	bp	2	bp_fanci	3	low
HeLa_UV_G3BP1_fanci_wt	AHI1	TRUE	HeLa	UV-light	fanci	2	bp_fanci	3	low
HeLa_UV_G3BP1_fanci_wt	AHI1-DT	TRUE	HeLa	UV-light	fanci	1	fanci	1	low
HEK293T_sorb_G3BP1_pl_wt	AHNAK	TRUE	HEK293T	sorbitol	pl	17	bp_pl_fanci	18	high
U2OS_ars_G3BP1_pl_wt	AHNAK	TRUE	U-2 OS	arsenite	pl	17	bp_pl_fanci	18	high
Tcell_stim_G3BP1_bp_wt	AHNAK	TRUE	T cell	stimulation	bp	17	bp_pl_fanci	18	high
U2OS_ars_ΔEDC3_bp	AHNAK	TRUE	U-2 OS	arsenite	bp	17	bp_pl_fanci	18	high
U2OS_ars_G3BP1_bp_wt	AHNAK	TRUE	U-2 OS	arsenite	bp	17	bp_pl_fanci	18	high
U2OS_ars_PABPC1_bp_wt	AHNAK	TRUE	U-2 OS	arsenite	bp	17	bp_pl_fanci	18	high
U2OS_sorb_PABPC1_bp_wt	AHNAK	TRUE	U-2 OS	sorbitol	bp	17	bp_pl_fanci	18	high
U2OS_sorb_PABPC1_bp_G3BPko	AHNAK	TRUE	U-2 OS	sorbitol	bp	17	bp_pl_fanci	18	high
U2OS_virus_G3BP1_bp_wt	AHNAK	TRUE	U-2 OS	virus	bp	17	bp_pl_fanci	18	high
HeLa_ars_G3BP1_bp_wt	AHNAK	TRUE	HeLa	arsenite	bp	17	bp_pl_fanci	18	high
HeLa_ars_G3BP1_fanci_wt	AHNAK	TRUE	HeLa	arsenite	fanci	17	bp_pl_fanci	18	high
HeLa_heat_G3BP1_fanci_wt	AHNAK	TRUE	HeLa	heatshock	fanci	17	bp_pl_fanci	18	high
HeLa_osm_G3BP1_fanci_wt	AHNAK	TRUE	HeLa	osmosis	fanci	17	bp_pl_fanci	18	high
HeLa_UV_G3BP1_fanci_wt	AHNAK	TRUE	HeLa	UV-light	fanci	17	bp_pl_fanci	18	high
SKNBE_ars_G3BP1_bp_FUS	AHNAK	TRUE	SK-N-BE	arsenite	bp	17	bp_pl_fanci	18	high
SKNBE_ars_G3BP1_bp_FUS-P525L	AHNAK	TRUE	SK-N-BE	arsenite	bp	17	bp_pl_fanci	18	high
SMMC_ars_G3BP1_bp_wt	AHNAK	TRUE	SMMC-7721	arsenite	bp	17	bp_pl_fanci	18	high
HEK293T_sorb_G3BP1_pl_wt	AHNAK2	TRUE	HEK293T	sorbitol	pl	16	bp_pl_fanci	17	high
U2OS_ars_G3BP1_pl_wt	AHNAK2	TRUE	U-2 OS	arsenite	pl	16	bp_pl_fanci	17	high
U2OS_ars_ΔEDC3_bp	AHNAK2	TRUE	U-2 OS	arsenite	bp	16	bp_pl_fanci	17	high
U2OS_ars_G3BP1_bp_wt	AHNAK2	TRUE	U-2 OS	arsenite	bp	16	bp_pl_fanci	17	high
U2OS_ars_PABPC1_bp_wt	AHNAK2	TRUE	U-2 OS	arsenite	bp	16	bp_pl_fanci	17	high
U2OS_sorb_PABPC1_bp_wt	AHNAK2	TRUE	U-2 OS	sorbitol	bp	16	bp_pl_fanci	17	high
U2OS_sorb_PABPC1_bp_G3BPko	AHNAK2	TRUE	U-2 OS	sorbitol	bp	16	bp_pl_fanci	17	high
U2OS_sorb_G3BP1_bp_wt	AHNAK2	TRUE	U-2 OS	sorbitol	bp	16	bp_pl_fanci	17	high
U2OS_virus_G3BP1_bp_wt	AHNAK2	TRUE	U-2 OS	virus	bp	16	bp_pl_fanci	17	high
HeLa_ars_G3BP1_bp_wt	AHNAK2	TRUE	HeLa	arsenite	bp	16	bp_pl_fanci	17	high
HeLa_ars_G3BP1_fanci_wt	AHNAK2	TRUE	HeLa	arsenite	fanci	16	bp_pl_fanci	17	high
HeLa_heat_G3BP1_fanci_wt	AHNAK2	TRUE	HeLa	heatshock	fanci	16	bp_pl_fanci	17	high
HeLa_osm_G3BP1_fanci_wt	AHNAK2	TRUE	HeLa	osmosis	fanci	16	bp_pl_fanci	17	high
SKNBE_ars_G3BP1_bp_FUS	AHNAK2	TRUE	SK-N-BE	arsenite	bp	16	bp_pl_fanci	17	high
SKNBE_ars_G3BP1_bp_FUS-P525L	AHNAK2	TRUE	SK-N-BE	arsenite	bp	16	bp_pl_fanci	17	high
SMMC_ars_G3BP1_bp_wt	AHNAK2	TRUE	SMMC-7721	arsenite	bp	16	bp_pl_fanci	17	high
Tcell_stim_G3BP1_bp_wt	AHR	TRUE	T cell	stimulation	bp	6	bp_pic_fanci	7	medium
HeLa_ars_G3BP1_pic_wt	AHR	TRUE	HeLa	arsenite	pic	6	bp_pic_fanci	7	medium
HeLa_ars_G3BP1_fanci_wt	AHR	TRUE	HeLa	arsenite	fanci	6	bp_pic_fanci	7	medium
HeLa_heat_G3BP1_fanci_wt	AHR	TRUE	HeLa	heatshock	fanci	6	bp_pic_fanci	7	medium
HeLa_osm_G3BP1_fanci_wt	AHR	TRUE	HeLa	osmosis	fanci	6	bp_pic_fanci	7	medium
HeLa_UV_G3BP1_fanci_wt	AHR	TRUE	HeLa	UV-light	fanci	6	bp_pic_fanci	7	medium
U2OS_ars_PABPC1_bp_wt	AHRR	TRUE	U-2 OS	arsenite	bp	1	bp	1	low
Tcell_stim_G3BP1_bp_wt	AHSA1	TRUE	T cell	stimulation	bp	2	bp_fanci	3	low
HeLa_ars_G3BP1_fanci_wt	AHSA1	TRUE	HeLa	arsenite	fanci	2	bp_fanci	3	low
U2OS_virus_G3BP1_bp_wt	AHSA2P	TRUE	U-2 OS	virus	bp	1	bp	1	low
HeLa_ars_G3BP1_fanci_wt	AIDA	TRUE	HeLa	arsenite	fanci	3	fanci	3	low
HeLa_heat_G3BP1_fanci_wt	AIDA	TRUE	HeLa	heatshock	fanci	3	fanci	3	low
HeLa_osm_G3BP1_fanci_wt	AIDA	TRUE	HeLa	osmosis	fanci	3	fanci	3	low
U2OS_ars_ΔEDC3_bp	AIF1L	TRUE	U-2 OS	arsenite	bp	1	bp	1	low
HEK293T_ars_G3BP1_pl_wt	AIFM1	TRUE	HEK293T	arsenite	pl	5	pl_pic_fanci	6	medium
U2OS_ars_G3BP1_pl_wt	AIFM1	TRUE	U-2 OS	arsenite	pl	5	pl_pic_fanci	6	medium
HeLa_ars_G3BP1_pic_wt	AIFM1	TRUE	HeLa	arsenite	pic	5	pl_pic_fanci	6	medium
HeLa_ars_G3BP1_fanci_wt	AIFM1	TRUE	HeLa	arsenite	fanci	5	pl_pic_fanci	6	medium
HeLa_osm_G3BP1_fanci_wt	AIFM1	TRUE	HeLa	osmosis	fanci	5	pl_pic_fanci	6	medium
PC3_ars_G3BP1_pl_wt	AIG1	TRUE	PC3	arsenite	bp	3	bp_pl_fanci	4	medium
HEK293T_hip_elF4A1_pl_wt	AIG1	TRUE	HEK293T	hippuristanol	pl	3	bp_pl_fanci	4	medium
HeLa_UV_G3BP1_fanci_wt	AIG1	TRUE	HeLa	UV-light	fanci	3	bp_pl_fanci	4	medium
Tcell_stim_G3BP1_bp_wt	AIMP1	TRUE	T cell	stimulation	bp	5	bp_fanci	6	medium
HeLa_ars_G3BP1_fanci_wt	AIMP1	TRUE	HeLa	arsenite	fanci	5	bp_fanci	6	medium
HeLa_heat_G3BP1_fanci_wt	AIMP1	TRUE	HeLa	heatshock	fanci	5	bp_fanci	6	medium
HeLa_osm_G3BP1_fanci_wt	AIMP1	TRUE	HeLa	osmosis	fanci	5	bp_fanci	6	medium
HeLa_UV_G3BP1_fanci_wt	AIMP1	TRUE	HeLa	UV-light	fanci	5	bp_fanci	6	medium
HEK293T_sorb_G3BP1_pl_wt	AIRIM	TRUE	HEK293T	sorbitol	pl	3	pl_fanci	4	medium
HeLa_ars_G3BP1_fanci_wt	AIRIM	TRUE	HeLa	arsenite	fanci	3	pl_fanci	4	medium
HeLa_heat_G3BP1_fanci_wt	AIRIM	TRUE	HeLa	heatshock	fanci	3	pl_fanci	4	medium
SKNBE_ars_G3BP1_bp_FUS	AJ011931.1	FALSE	SK-N-BE	arsenite	bp	1	bp	1	low
HeLa_ars_G3BP1_bp_wt	AJM1	TRUE	HeLa	arsenite	bp	4	bp_fanci	5	medium
HeLa_osm_G3BP1_fanci_wt	AJM1	TRUE	HeLa	osmosis	fanci	4	bp_fanci	5	medium
SKNBE_ars_G3BP1_bp_FUS	AJM1	TRUE	SK-N-BE	arsenite	bp	4	bp_fanci	5	medium
SMMC_ars_G3BP1_bp_wt	AJM1	TRUE	SMMC-7721	arsenite	bp	4	bp_fanci	5	medium
U2OS_ars_ΔEDC3_bp	AJUBA	TRUE	U-2 OS	arsenite	bp	2	bp	2	low
U2OS_ars_G3BP1_bp_wt	AJUBA	TRUE	U-2 OS	arsenite	bp	2	bp	2	low
HeLa_osm_G3BP1_fanci_wt	AK1	TRUE	HeLa	osmosis	fanci	2	bp_fanci	3	low
SMMC_ars_G3BP1_bp_wt	AK1	TRUE	SMMC-7721	arsenite	bp	2	bp_fanci	3	low
Tcell_stim_G3BP1_bp_wt	AK2	TRUE	T cell	stimulation	bp	2	bp	2	low
PC3_ars_G3BP1_pl_wt	AK2	TRUE	PC3	arsenite	bp	2	bp	2	low
U2OS_ars_G3BP1_pl_wt	AK3	TRUE	U-2 OS	arsenite	pl	5	bp_pl_fanci	6	medium
Tcell_stim_G3BP1_bp_wt	AK3	TRUE	T cell	stimulation	bp	5	bp_pl_fanci	6	medium
HeLa_ars_G3BP1_fanci_wt	AK3	TRUE	HeLa	arsenite	fanci	5	bp_pl_fanci	6	medium
HeLa_heat_G3BP1_fanci_wt	AK3	TRUE	HeLa	heatshock	fanci	5	bp_pl_fanci	6	medium
HeLa_osm_G3BP1_fanci_wt	AK3	TRUE	HeLa	osmosis	fanci	5	bp_pl_fanci	6	medium
U2OS_ars_G3BP1_pl_wt	AK4	TRUE	U-2 OS	arsenite	pl	5	pl_fanci	6	medium
HeLa_ars_G3BP1_fanci_wt	AK4	TRUE	HeLa	arsenite	fanci	5	pl_fanci	6	medium
HeLa_heat_G3BP1_fanci_wt	AK4	TRUE	HeLa	heatshock	fanci	5	pl_fanci	6	medium
HeLa_osm_G3BP1_fanci_wt	AK4	TRUE	HeLa	osmosis	fanci	5	pl_fanci	6	medium
HeLa_UV_G3BP1_fanci_wt	AK4	TRUE	HeLa	UV-light	fanci	5	pl_fanci	6	medium
HeLa_ars_G3BP1_pic_wt	AK6	TRUE	HeLa	arsenite	pic	1	pic	1	low
HeLa_UV_G3BP1_fanci_wt	AK9	TRUE	HeLa	UV-light	fanci	1	fanci	1	low
HEK293T_ars_G3BP1_pl_wt	AKAP1	TRUE	HEK293T	arsenite	pl	10	bp_pl_fanci	11	high
HEK293T_sorb_G3BP1_pl_wt	AKAP1	TRUE	HEK293T	sorbitol	pl	10	bp_pl_fanci	11	high
U2OS_ars_G3BP1_bp_wt	AKAP1	TRUE	U-2 OS	arsenite	bp	10	bp_pl_fanci	11	high
U2OS_sorb_PABPC1_bp_G3BPko	AKAP1	TRUE	U-2 OS	sorbitol	bp	10	bp_pl_fanci	11	high
HEK293T_heat_elF4A1_pl_wt	AKAP1	TRUE	HEK293T	heatshock	pl	10	bp_pl_fanci	11	high
U251_ars_G3BP1_bp_wt	AKAP1	TRUE	U251	arsenite	bp	10	bp_pl_fanci	11	high
HeLa_ars_G3BP1_fanci_wt	AKAP1	TRUE	HeLa	arsenite	fanci	10	bp_pl_fanci	11	high
HeLa_heat_G3BP1_fanci_wt	AKAP1	TRUE	HeLa	heatshock	fanci	10	bp_pl_fanci	11	high
SKNBE_ars_G3BP1_bp_FUS	AKAP1	TRUE	SK-N-BE	arsenite	bp	10	bp_pl_fanci	11	high
SMMC_ars_G3BP1_bp_wt	AKAP1	TRUE	SMMC-7721	arsenite	bp	10	bp_pl_fanci	11	high
HEK293T_heat_elF4A1_pl_wt	AKAP1-DT	TRUE	HEK293T	heatshock	pl	1	pl	1	low
HEK293T_ars_G3BP1_pl_wt	AKAP10	TRUE	HEK293T	arsenite	pl	5	bp_pl_fanci	6	medium
Tcell_stim_G3BP1_bp_wt	AKAP10	TRUE	T cell	stimulation	bp	5	bp_pl_fanci	6	medium
HeLa_ars_G3BP1_fanci_wt	AKAP10	TRUE	HeLa	arsenite	fanci	5	bp_pl_fanci	6	medium
HeLa_heat_G3BP1_fanci_wt	AKAP10	TRUE	HeLa	heatshock	fanci	5	bp_pl_fanci	6	medium
SKNBE_ars_G3BP1_bp_FUS	AKAP10	TRUE	SK-N-BE	arsenite	bp	5	bp_pl_fanci	6	medium
HEK293T_sorb_G3BP1_pl_wt	AKAP11	TRUE	HEK293T	sorbitol	pl	14	bp_pl_pic_fanci	15	high
Tcell_stim_G3BP1_bp_wt	AKAP11	TRUE	T cell	stimulation	bp	14	bp_pl_pic_fanci	15	high
U2OS_ars_G3BP1_bp_wt	AKAP11	TRUE	U-2 OS	arsenite	bp	14	bp_pl_pic_fanci	15	high
U2OS_ars_PABPC1_bp_wt	AKAP11	TRUE	U-2 OS	arsenite	bp	14	bp_pl_pic_fanci	15	high
U2OS_sorb_PABPC1_bp_wt	AKAP11	TRUE	U-2 OS	sorbitol	bp	14	bp_pl_pic_fanci	15	high
U2OS_sorb_G3BP1_bp_wt	AKAP11	TRUE	U-2 OS	sorbitol	bp	14	bp_pl_pic_fanci	15	high
HeLa_ars_G3BP1_bp_wt	AKAP11	TRUE	HeLa	arsenite	bp	14	bp_pl_pic_fanci	15	high
HeLa_ars_G3BP1_pic_wt	AKAP11	TRUE	HeLa	arsenite	pic	14	bp_pl_pic_fanci	15	high
HeLa_ars_G3BP1_fanci_wt	AKAP11	TRUE	HeLa	arsenite	fanci	14	bp_pl_pic_fanci	15	high
HeLa_heat_G3BP1_fanci_wt	AKAP11	TRUE	HeLa	heatshock	fanci	14	bp_pl_pic_fanci	15	high
HeLa_osm_G3BP1_fanci_wt	AKAP11	TRUE	HeLa	osmosis	fanci	14	bp_pl_pic_fanci	15	high
HeLa_UV_G3BP1_fanci_wt	AKAP11	TRUE	HeLa	UV-light	fanci	14	bp_pl_pic_fanci	15	high
SKNBE_ars_G3BP1_bp_FUS	AKAP11	TRUE	SK-N-BE	arsenite	bp	14	bp_pl_pic_fanci	15	high
SKNBE_ars_G3BP1_bp_FUS-P525L	AKAP11	TRUE	SK-N-BE	arsenite	bp	14	bp_pl_pic_fanci	15	high
HEK293T_ars_G3BP1_pl_wt	AKAP12	TRUE	HEK293T	arsenite	pl	12	bp_pl	13	high
U2OS_ars_G3BP1_pl_wt	AKAP12	TRUE	U-2 OS	arsenite	pl	12	bp_pl	13	high
U2OS_ars_G3BP1_bp_wt	AKAP12	TRUE	U-2 OS	arsenite	bp	12	bp_pl	13	high
U2OS_ars_PABPC1_bp_wt	AKAP12	TRUE	U-2 OS	arsenite	bp	12	bp_pl	13	high
U2OS_sorb_PABPC1_bp_wt	AKAP12	TRUE	U-2 OS	sorbitol	bp	12	bp_pl	13	high
U2OS_sorb_PABPC1_bp_G3BPko	AKAP12	TRUE	U-2 OS	sorbitol	bp	12	bp_pl	13	high
U2OS_virus_G3BP1_bp_wt	AKAP12	TRUE	U-2 OS	virus	bp	12	bp_pl	13	high
HeLa_ars_G3BP1_bp_wt	AKAP12	TRUE	HeLa	arsenite	bp	12	bp_pl	13	high
HeLa_ars_G3BP1_bp_NAT10ko	AKAP12	TRUE	HeLa	arsenite	bp	12	bp_pl	13	high
SKNBE_ars_G3BP1_bp_FUS	AKAP12	TRUE	SK-N-BE	arsenite	bp	12	bp_pl	13	high
SKNBE_ars_G3BP1_bp_FUS-P525L	AKAP12	TRUE	SK-N-BE	arsenite	bp	12	bp_pl	13	high
SMMC_ars_G3BP1_bp_wt	AKAP12	TRUE	SMMC-7721	arsenite	bp	12	bp_pl	13	high
Tcell_stim_G3BP1_bp_wt	AKAP13	TRUE	T cell	stimulation	bp	10	bp_fanci	11	high
U2OS_ars_G3BP1_bp_wt	AKAP13	TRUE	U-2 OS	arsenite	bp	10	bp_fanci	11	high
U2OS_ars_PABPC1_bp_wt	AKAP13	TRUE	U-2 OS	arsenite	bp	10	bp_fanci	11	high
U2OS_sorb_PABPC1_bp_G3BPko	AKAP13	TRUE	U-2 OS	sorbitol	bp	10	bp_fanci	11	high
U2OS_virus_G3BP1_bp_wt	AKAP13	TRUE	U-2 OS	virus	bp	10	bp_fanci	11	high
HeLa_ars_G3BP1_bp_wt	AKAP13	TRUE	HeLa	arsenite	bp	10	bp_fanci	11	high
HeLa_ars_G3BP1_fanci_wt	AKAP13	TRUE	HeLa	arsenite	fanci	10	bp_fanci	11	high
SKNBE_ars_G3BP1_bp_FUS	AKAP13	TRUE	SK-N-BE	arsenite	bp	10	bp_fanci	11	high
SKNBE_ars_G3BP1_bp_FUS-P525L	AKAP13	TRUE	SK-N-BE	arsenite	bp	10	bp_fanci	11	high
SMMC_ars_G3BP1_bp_wt	AKAP13	TRUE	SMMC-7721	arsenite	bp	10	bp_fanci	11	high
Tcell_stim_G3BP1_bp_wt	AKAP17A	TRUE	T cell	stimulation	bp	3	bp_pl	4	medium
HEK293T_heat_elF4A1_pl_wt	AKAP17A	TRUE	HEK293T	heatshock	pl	3	bp_pl	4	medium
SMMC_ars_G3BP1_bp_wt	AKAP17A	TRUE	SMMC-7721	arsenite	bp	3	bp_pl	4	medium
Tcell_stim_G3BP1_bp_wt	AKAP2	TRUE	T cell	stimulation	bp	7	bp	7	medium
U2OS_ars_G3BP1_bp_wt	AKAP2	TRUE	U-2 OS	arsenite	bp	7	bp	7	medium
U2OS_ars_PABPC1_bp_wt	AKAP2	TRUE	U-2 OS	arsenite	bp	7	bp	7	medium
U2OS_sorb_PABPC1_bp_wt	AKAP2	TRUE	U-2 OS	sorbitol	bp	7	bp	7	medium
U2OS_sorb_PABPC1_bp_G3BPko	AKAP2	TRUE	U-2 OS	sorbitol	bp	7	bp	7	medium
U2OS_sorb_G3BP1_bp_wt	AKAP2	TRUE	U-2 OS	sorbitol	bp	7	bp	7	medium
U2OS_virus_G3BP1_bp_wt	AKAP2	TRUE	U-2 OS	virus	bp	7	bp	7	medium
U251_ars_G3BP1_bp_wt	AKAP5	TRUE	U251	arsenite	bp	1	bp	1	low
HeLa_UV_G3BP1_fanci_wt	AKAP6	TRUE	HeLa	UV-light	fanci	3	bp_fanci	4	medium
SKNBE_ars_G3BP1_bp_FUS	AKAP6	TRUE	SK-N-BE	arsenite	bp	3	bp_fanci	4	medium
SKNBE_ars_G3BP1_bp_FUS-P525L	AKAP6	TRUE	SK-N-BE	arsenite	bp	3	bp_fanci	4	medium
HeLa_heat_G3BP1_fanci_wt	AKAP7	TRUE	HeLa	heatshock	fanci	2	fanci	2	low
HeLa_UV_G3BP1_fanci_wt	AKAP7	TRUE	HeLa	UV-light	fanci	2	fanci	2	low
Tcell_stim_G3BP1_bp_wt	AKAP8	TRUE	T cell	stimulation	bp	2	bp	2	low
SMMC_ars_G3BP1_bp_wt	AKAP8	TRUE	SMMC-7721	arsenite	bp	2	bp	2	low
Tcell_stim_G3BP1_bp_wt	AKAP8L	TRUE	T cell	stimulation	bp	4	bp_pl	5	medium
HEK293T_heat_elF4A1_pl_wt	AKAP8L	TRUE	HEK293T	heatshock	pl	4	bp_pl	5	medium
HEK293T_hip_elF4A1_pl_wt	AKAP8L	TRUE	HEK293T	hippuristanol	pl	4	bp_pl	5	medium
SMMC_ars_G3BP1_bp_wt	AKAP8L	TRUE	SMMC-7721	arsenite	bp	4	bp_pl	5	medium
Tcell_stim_G3BP1_bp_wt	AKAP9	TRUE	T cell	stimulation	bp	7	bp_fanci	8	medium
U2OS_ars_G3BP1_bp_wt	AKAP9	TRUE	U-2 OS	arsenite	bp	7	bp_fanci	8	medium
U2OS_ars_PABPC1_bp_wt	AKAP9	TRUE	U-2 OS	arsenite	bp	7	bp_fanci	8	medium
HeLa_ars_G3BP1_bp_wt	AKAP9	TRUE	HeLa	arsenite	bp	7	bp_fanci	8	medium
HeLa_UV_G3BP1_fanci_wt	AKAP9	TRUE	HeLa	UV-light	fanci	7	bp_fanci	8	medium
SKNBE_ars_G3BP1_bp_FUS-P525L	AKAP9	TRUE	SK-N-BE	arsenite	bp	7	bp_fanci	8	medium
SMMC_ars_G3BP1_bp_wt	AKAP9	TRUE	SMMC-7721	arsenite	bp	7	bp_fanci	8	medium
HeLa_ars_G3BP1_fanci_wt	AKIP1	TRUE	HeLa	arsenite	fanci	2	fanci	2	low
HeLa_osm_G3BP1_fanci_wt	AKIP1	TRUE	HeLa	osmosis	fanci	2	fanci	2	low
HEK293T_sorb_G3BP1_pl_wt	AKIRIN1	TRUE	HEK293T	sorbitol	pl	7	pl_pic_fanci	8	medium
U2OS_ars_G3BP1_pl_wt	AKIRIN1	TRUE	U-2 OS	arsenite	pl	7	pl_pic_fanci	8	medium
HeLa_ars_G3BP1_pic_wt	AKIRIN1	TRUE	HeLa	arsenite	pic	7	pl_pic_fanci	8	medium
HeLa_ars_G3BP1_fanci_wt	AKIRIN1	TRUE	HeLa	arsenite	fanci	7	pl_pic_fanci	8	medium
HeLa_heat_G3BP1_fanci_wt	AKIRIN1	TRUE	HeLa	heatshock	fanci	7	pl_pic_fanci	8	medium
HeLa_osm_G3BP1_fanci_wt	AKIRIN1	TRUE	HeLa	osmosis	fanci	7	pl_pic_fanci	8	medium
HeLa_UV_G3BP1_fanci_wt	AKIRIN1	TRUE	HeLa	UV-light	fanci	7	pl_pic_fanci	8	medium
PC3_ars_G3BP1_pl_wt	AKIRIN2	TRUE	PC3	arsenite	bp	2	bp_fanci	3	low
HeLa_UV_G3BP1_fanci_wt	AKIRIN2	TRUE	HeLa	UV-light	fanci	2	bp_fanci	3	low
Tcell_stim_G3BP1_bp_wt	AKNA	TRUE	T cell	stimulation	bp	6	bp	6	medium
U2OS_ars_PABPC1_bp_wt	AKNA	TRUE	U-2 OS	arsenite	bp	6	bp	6	medium
U2OS_sorb_PABPC1_bp_wt	AKNA	TRUE	U-2 OS	sorbitol	bp	6	bp	6	medium
HeLa_ars_G3BP1_bp_wt	AKNA	TRUE	HeLa	arsenite	bp	6	bp	6	medium
SKNBE_ars_G3BP1_bp_FUS	AKNA	TRUE	SK-N-BE	arsenite	bp	6	bp	6	medium
SMMC_ars_G3BP1_bp_wt	AKNA	TRUE	SMMC-7721	arsenite	bp	6	bp	6	medium
HeLa_ars_G3BP1_pic_wt	AKR1B1	TRUE	HeLa	arsenite	pic	1	pic	1	low
HEK293T_hip_elF4A1_pl_wt	AKR1B1P1	TRUE	HEK293T	hippuristanol	pl	1	pl	1	low
HeLa_ars_G3BP1_pic_wt	AKR1C1	TRUE	HeLa	arsenite	pic	2	bp_pic	3	low
SMMC_ars_G3BP1_bp_wt	AKR1C1	TRUE	SMMC-7721	arsenite	bp	2	bp_pic	3	low
HeLa_ars_G3BP1_pic_wt	AKR1C2	TRUE	HeLa	arsenite	pic	1	pic	1	low
Tcell_stim_G3BP1_bp_wt	AKT2	TRUE	T cell	stimulation	bp	1	bp	1	low
U2OS_ars_G3BP1_pl_wt	AKT3	TRUE	U-2 OS	arsenite	pl	6	bp_pl_fanci	7	medium
Tcell_stim_G3BP1_bp_wt	AKT3	TRUE	T cell	stimulation	bp	6	bp_pl_fanci	7	medium
U2OS_ars_G3BP1_bp_wt	AKT3	TRUE	U-2 OS	arsenite	bp	6	bp_pl_fanci	7	medium
U2OS_sorb_PABPC1_bp_wt	AKT3	TRUE	U-2 OS	sorbitol	bp	6	bp_pl_fanci	7	medium
U251_ars_G3BP1_bp_wt	AKT3	TRUE	U251	arsenite	bp	6	bp_pl_fanci	7	medium
HeLa_UV_G3BP1_fanci_wt	AKT3	TRUE	HeLa	UV-light	fanci	6	bp_pl_fanci	7	medium
HeLa_ars_G3BP1_fanci_wt	AKTIP	TRUE	HeLa	arsenite	fanci	3	fanci	3	low
HeLa_heat_G3BP1_fanci_wt	AKTIP	TRUE	HeLa	heatshock	fanci	3	fanci	3	low
HeLa_osm_G3BP1_fanci_wt	AKTIP	TRUE	HeLa	osmosis	fanci	3	fanci	3	low
U2OS_ars_ΔEDC3_bp	AL008721.2	FALSE	U-2 OS	arsenite	bp	2	bp	2	low
SKNBE_ars_G3BP1_bp_FUS	AL008721.2	FALSE	SK-N-BE	arsenite	bp	2	bp	2	low
Tcell_stim_G3BP1_bp_wt	AL008730.1	FALSE	T cell	stimulation	bp	1	bp	1	low
SMMC_ars_G3BP1_bp_wt	AL009174.1	FALSE	SMMC-7721	arsenite	bp	1	bp	1	low
SKNBE_ars_G3BP1_bp_FUS	AL021707.1	FALSE	SK-N-BE	arsenite	bp	1	bp	1	low
SKNBE_ars_G3BP1_bp_FUS	AL021707.3	FALSE	SK-N-BE	arsenite	bp	1	bp	1	low
Tcell_stim_G3BP1_bp_wt	AL021707.5	FALSE	T cell	stimulation	bp	1	bp	1	low
SMMC_ars_G3BP1_bp_wt	AL021707.6	FALSE	SMMC-7721	arsenite	bp	1	bp	1	low
U2OS_ars_ΔEDC3_bp	AL021937.1	FALSE	U-2 OS	arsenite	bp	1	bp	1	low
Tcell_stim_G3BP1_bp_wt	AL022151.1	FALSE	T cell	stimulation	bp	1	bp	1	low
SKNBE_ars_G3BP1_bp_FUS	AL022322.1	FALSE	SK-N-BE	arsenite	bp	1	bp	1	low
U2OS_ars_ΔEDC3_bp	AL022324.2	FALSE	U-2 OS	arsenite	bp	3	bp	3	low
SKNBE_ars_G3BP1_bp_FUS	AL022324.2	FALSE	SK-N-BE	arsenite	bp	3	bp	3	low
SKNBE_ars_G3BP1_bp_FUS-P525L	AL022324.2	FALSE	SK-N-BE	arsenite	bp	3	bp	3	low
SKNBE_ars_G3BP1_bp_FUS	AL022328.1	FALSE	SK-N-BE	arsenite	bp	1	bp	1	low
SKNBE_ars_G3BP1_bp_FUS	AL022328.2	FALSE	SK-N-BE	arsenite	bp	1	bp	1	low
SKNBE_ars_G3BP1_bp_FUS	AL022328.3	FALSE	SK-N-BE	arsenite	bp	1	bp	1	low
SKNBE_ars_G3BP1_bp_FUS	AL022328.4	FALSE	SK-N-BE	arsenite	bp	1	bp	1	low
SKNBE_ars_G3BP1_bp_FUS	AL022341.1	FALSE	SK-N-BE	arsenite	bp	1	bp	1	low
SKNBE_ars_G3BP1_bp_FUS	AL022341.2	FALSE	SK-N-BE	arsenite	bp	1	bp	1	low
SKNBE_ars_G3BP1_bp_FUS	AL022722.1	FALSE	SK-N-BE	arsenite	bp	1	bp	1	low
SKNBE_ars_G3BP1_bp_FUS	AL031587.3	FALSE	SK-N-BE	arsenite	bp	1	bp	1	low
Tcell_stim_G3BP1_bp_wt	AL031587.5	FALSE	T cell	stimulation	bp	4	bp	4	medium
U2OS_ars_ΔEDC3_bp	AL031587.5	FALSE	U-2 OS	arsenite	bp	4	bp	4	medium
SKNBE_ars_G3BP1_bp_FUS	AL031587.5	FALSE	SK-N-BE	arsenite	bp	4	bp	4	medium
SKNBE_ars_G3BP1_bp_FUS-P525L	AL031587.5	FALSE	SK-N-BE	arsenite	bp	4	bp	4	medium
SMMC_ars_G3BP1_bp_wt	AL031709.1	FALSE	SMMC-7721	arsenite	bp	1	bp	1	low
SKNBE_ars_G3BP1_bp_FUS	AL032819.2	FALSE	SK-N-BE	arsenite	bp	1	bp	1	low
HeLa_ars_G3BP1_bp_wt	AL035071.1	FALSE	HeLa	arsenite	bp	2	bp	2	low
SKNBE_ars_G3BP1_bp_FUS-P525L	AL035071.1	FALSE	SK-N-BE	arsenite	bp	2	bp	2	low
U2OS_ars_ΔEDC3_bp	AL035252.3	FALSE	U-2 OS	arsenite	bp	1	bp	1	low
SKNBE_ars_G3BP1_bp_FUS	AL035461.3	FALSE	SK-N-BE	arsenite	bp	2	bp	2	low
SKNBE_ars_G3BP1_bp_FUS-P525L	AL035461.3	FALSE	SK-N-BE	arsenite	bp	2	bp	2	low
Tcell_stim_G3BP1_bp_wt	AL049828.1	FALSE	T cell	stimulation	bp	1	bp	1	low
Tcell_stim_G3BP1_bp_wt	AL049840.2	FALSE	T cell	stimulation	bp	1	bp	1	low
Tcell_stim_G3BP1_bp_wt	AL049840.4	FALSE	T cell	stimulation	bp	1	bp	1	low
SKNBE_ars_G3BP1_bp_FUS	AL049840.5	FALSE	SK-N-BE	arsenite	bp	2	bp	2	low
SMMC_ars_G3BP1_bp_wt	AL049840.5	FALSE	SMMC-7721	arsenite	bp	2	bp	2	low
SKNBE_ars_G3BP1_bp_FUS	AL049840.6	FALSE	SK-N-BE	arsenite	bp	1	bp	1	low
SMMC_ars_G3BP1_bp_wt	AL049872.1	FALSE	SMMC-7721	arsenite	bp	1	bp	1	low
SKNBE_ars_G3BP1_bp_FUS	AL050343.2	FALSE	SK-N-BE	arsenite	bp	1	bp	1	low
SMMC_ars_G3BP1_bp_wt	AL078621.1	FALSE	SMMC-7721	arsenite	bp	1	bp	1	low
SKNBE_ars_G3BP1_bp_FUS	AL079301.1	FALSE	SK-N-BE	arsenite	bp	2	bp	2	low
SKNBE_ars_G3BP1_bp_FUS-P525L	AL079301.1	FALSE	SK-N-BE	arsenite	bp	2	bp	2	low
SKNBE_ars_G3BP1_bp_FUS	AL080317.1	FALSE	SK-N-BE	arsenite	bp	2	bp	2	low
SKNBE_ars_G3BP1_bp_FUS-P525L	AL080317.1	FALSE	SK-N-BE	arsenite	bp	2	bp	2	low
SMMC_ars_G3BP1_bp_wt	AL096870.8	FALSE	SMMC-7721	arsenite	bp	1	bp	1	low
SKNBE_ars_G3BP1_bp_FUS	AL109615.4	FALSE	SK-N-BE	arsenite	bp	3	bp	3	low
SKNBE_ars_G3BP1_bp_FUS-P525L	AL109615.4	FALSE	SK-N-BE	arsenite	bp	3	bp	3	low
SMMC_ars_G3BP1_bp_wt	AL109615.4	FALSE	SMMC-7721	arsenite	bp	3	bp	3	low
SKNBE_ars_G3BP1_bp_FUS	AL109627.1	FALSE	SK-N-BE	arsenite	bp	1	bp	1	low
Tcell_stim_G3BP1_bp_wt	AL109936.6	FALSE	T cell	stimulation	bp	1	bp	1	low
U2OS_ars_ΔEDC3_bp	AL118506.1	FALSE	U-2 OS	arsenite	bp	2	bp	2	low
SMMC_ars_G3BP1_bp_wt	AL118506.1	FALSE	SMMC-7721	arsenite	bp	2	bp	2	low
SMMC_ars_G3BP1_bp_wt	AL118558.1	FALSE	SMMC-7721	arsenite	bp	1	bp	1	low
Tcell_stim_G3BP1_bp_wt	AL121768.1	FALSE	T cell	stimulation	bp	1	bp	1	low
U2OS_ars_ΔEDC3_bp	AL121772.1	FALSE	U-2 OS	arsenite	bp	1	bp	1	low
SKNBE_ars_G3BP1_bp_FUS	AL121772.3	FALSE	SK-N-BE	arsenite	bp	1	bp	1	low
SMMC_ars_G3BP1_bp_wt	AL121929.3	FALSE	SMMC-7721	arsenite	bp	1	bp	1	low
SMMC_ars_G3BP1_bp_wt	AL121992.3	FALSE	SMMC-7721	arsenite	bp	1	bp	1	low
SKNBE_ars_G3BP1_bp_FUS	AL122035.2	FALSE	SK-N-BE	arsenite	bp	2	bp	2	low
SKNBE_ars_G3BP1_bp_FUS-P525L	AL122035.2	FALSE	SK-N-BE	arsenite	bp	2	bp	2	low
SKNBE_ars_G3BP1_bp_FUS	AL132656.1	FALSE	SK-N-BE	arsenite	bp	2	bp	2	low
SKNBE_ars_G3BP1_bp_FUS-P525L	AL132656.1	FALSE	SK-N-BE	arsenite	bp	2	bp	2	low
SKNBE_ars_G3BP1_bp_FUS	AL132656.4	FALSE	SK-N-BE	arsenite	bp	2	bp	2	low
SKNBE_ars_G3BP1_bp_FUS-P525L	AL132656.4	FALSE	SK-N-BE	arsenite	bp	2	bp	2	low
Tcell_stim_G3BP1_bp_wt	AL132799.1	FALSE	T cell	stimulation	bp	1	bp	1	low
U2OS_ars_ΔEDC3_bp	AL133367.1	FALSE	U-2 OS	arsenite	bp	1	bp	1	low
SMMC_ars_G3BP1_bp_wt	AL133410.1	FALSE	SMMC-7721	arsenite	bp	1	bp	1	low
SKNBE_ars_G3BP1_bp_FUS	AL133520.1	FALSE	SK-N-BE	arsenite	bp	1	bp	1	low
SMMC_ars_G3BP1_bp_wt	AL136131.3	FALSE	SMMC-7721	arsenite	bp	1	bp	1	low
SKNBE_ars_G3BP1_bp_FUS	AL136304.1	FALSE	SK-N-BE	arsenite	bp	1	bp	1	low
Tcell_stim_G3BP1_bp_wt	AL136419.3	FALSE	T cell	stimulation	bp	1	bp	1	low
SKNBE_ars_G3BP1_bp_FUS-P525L	AL136981.2	FALSE	SK-N-BE	arsenite	bp	1	bp	1	low
U2OS_ars_ΔEDC3_bp	AL137002.2	FALSE	U-2 OS	arsenite	bp	1	bp	1	low
SMMC_ars_G3BP1_bp_wt	AL137077.1	FALSE	SMMC-7721	arsenite	bp	1	bp	1	low
Tcell_stim_G3BP1_bp_wt	AL138828.1	FALSE	T cell	stimulation	bp	1	bp	1	low
Tcell_stim_G3BP1_bp_wt	AL139147.1	FALSE	T cell	stimulation	bp	1	bp	1	low
SMMC_ars_G3BP1_bp_wt	AL139220.2	FALSE	SMMC-7721	arsenite	bp	1	bp	1	low
Tcell_stim_G3BP1_bp_wt	AL139300.1	FALSE	T cell	stimulation	bp	1	bp	1	low
U2OS_ars_G3BP1_bp_wt	AL139819.1	FALSE	U-2 OS	arsenite	bp	3	bp	3	low
U2OS_sorb_PABPC1_bp_wt	AL139819.1	FALSE	U-2 OS	sorbitol	bp	3	bp	3	low
U2OS_sorb_G3BP1_bp_wt	AL139819.1	FALSE	U-2 OS	sorbitol	bp	3	bp	3	low
SKNBE_ars_G3BP1_bp_FUS	AL157400.4	FALSE	SK-N-BE	arsenite	bp	2	bp	2	low
SKNBE_ars_G3BP1_bp_FUS-P525L	AL157400.4	FALSE	SK-N-BE	arsenite	bp	2	bp	2	low
U2OS_ars_ΔEDC3_bp	AL157700.1	FALSE	U-2 OS	arsenite	bp	1	bp	1	low
Tcell_stim_G3BP1_bp_wt	AL157997.1	FALSE	T cell	stimulation	bp	1	bp	1	low
SKNBE_ars_G3BP1_bp_FUS-P525L	AL158206.1	FALSE	SK-N-BE	arsenite	bp	1	bp	1	low
Tcell_stim_G3BP1_bp_wt	AL158212.3	FALSE	T cell	stimulation	bp	3	bp	3	low
HeLa_ars_G3BP1_bp_wt	AL158212.3	FALSE	HeLa	arsenite	bp	3	bp	3	low
SKNBE_ars_G3BP1_bp_FUS	AL158212.3	FALSE	SK-N-BE	arsenite	bp	3	bp	3	low
U2OS_ars_ΔEDC3_bp	AL158212.4	FALSE	U-2 OS	arsenite	bp	1	bp	1	low
SMMC_ars_G3BP1_bp_wt	AL159141.1	FALSE	SMMC-7721	arsenite	bp	1	bp	1	low
Tcell_stim_G3BP1_bp_wt	AL160006.1	FALSE	T cell	stimulation	bp	6	bp	6	medium
U2OS_ars_ΔEDC3_bp	AL160006.1	FALSE	U-2 OS	arsenite	bp	6	bp	6	medium
HeLa_ars_G3BP1_bp_wt	AL160006.1	FALSE	HeLa	arsenite	bp	6	bp	6	medium
SKNBE_ars_G3BP1_bp_FUS	AL160006.1	FALSE	SK-N-BE	arsenite	bp	6	bp	6	medium
SKNBE_ars_G3BP1_bp_FUS-P525L	AL160006.1	FALSE	SK-N-BE	arsenite	bp	6	bp	6	medium
SMMC_ars_G3BP1_bp_wt	AL160006.1	FALSE	SMMC-7721	arsenite	bp	6	bp	6	medium
SKNBE_ars_G3BP1_bp_FUS	AL161729.4	FALSE	SK-N-BE	arsenite	bp	1	bp	1	low
SKNBE_ars_G3BP1_bp_FUS-P525L	AL161891.1	FALSE	SK-N-BE	arsenite	bp	1	bp	1	low
SKNBE_ars_G3BP1_bp_FUS-P525L	AL162431.1	FALSE	SK-N-BE	arsenite	bp	1	bp	1	low
SKNBE_ars_G3BP1_bp_FUS	AL162586.1	FALSE	SK-N-BE	arsenite	bp	1	bp	1	low
Tcell_stim_G3BP1_bp_wt	AL162632.1	FALSE	T cell	stimulation	bp	1	bp	1	low
Tcell_stim_G3BP1_bp_wt	AL352979.2	FALSE	T cell	stimulation	bp	1	bp	1	low
SMMC_ars_G3BP1_bp_wt	AL353150.1	FALSE	SMMC-7721	arsenite	bp	1	bp	1	low
SKNBE_ars_G3BP1_bp_FUS-P525L	AL353746.1	FALSE	SK-N-BE	arsenite	bp	1	bp	1	low
SMMC_ars_G3BP1_bp_wt	AL354714.2	FALSE	SMMC-7721	arsenite	bp	1	bp	1	low
Tcell_stim_G3BP1_bp_wt	AL354733.3	FALSE	T cell	stimulation	bp	1	bp	1	low
SKNBE_ars_G3BP1_bp_FUS	AL354822.1	FALSE	SK-N-BE	arsenite	bp	2	bp	2	low
SKNBE_ars_G3BP1_bp_FUS-P525L	AL354822.1	FALSE	SK-N-BE	arsenite	bp	2	bp	2	low
SMMC_ars_G3BP1_bp_wt	AL354836.1	FALSE	SMMC-7721	arsenite	bp	1	bp	1	low
SMMC_ars_G3BP1_bp_wt	AL354864.1	FALSE	SMMC-7721	arsenite	bp	1	bp	1	low
Tcell_stim_G3BP1_bp_wt	AL355347.1	FALSE	T cell	stimulation	bp	1	bp	1	low
Tcell_stim_G3BP1_bp_wt	AL355488.1	FALSE	T cell	stimulation	bp	1	bp	1	low
SKNBE_ars_G3BP1_bp_FUS	AL356019.2	FALSE	SK-N-BE	arsenite	bp	2	bp	2	low
SKNBE_ars_G3BP1_bp_FUS-P525L	AL356019.2	FALSE	SK-N-BE	arsenite	bp	2	bp	2	low
SKNBE_ars_G3BP1_bp_FUS	AL356056.2	FALSE	SK-N-BE	arsenite	bp	2	bp	2	low
SMMC_ars_G3BP1_bp_wt	AL356056.2	FALSE	SMMC-7721	arsenite	bp	2	bp	2	low
SMMC_ars_G3BP1_bp_wt	AL356234.1	FALSE	SMMC-7721	arsenite	bp	1	bp	1	low
SKNBE_ars_G3BP1_bp_FUS	AL356481.3	FALSE	SK-N-BE	arsenite	bp	2	bp	2	low
SMMC_ars_G3BP1_bp_wt	AL356481.3	FALSE	SMMC-7721	arsenite	bp	2	bp	2	low
SKNBE_ars_G3BP1_bp_FUS	AL356489.2	FALSE	SK-N-BE	arsenite	bp	2	bp	2	low
SKNBE_ars_G3BP1_bp_FUS-P525L	AL356489.2	FALSE	SK-N-BE	arsenite	bp	2	bp	2	low
SMMC_ars_G3BP1_bp_wt	AL356653.1	FALSE	SMMC-7721	arsenite	bp	1	bp	1	low
U2OS_ars_G3BP1_bp_wt	AL356740.1	FALSE	U-2 OS	arsenite	bp	1	bp	1	low
U2OS_ars_ΔEDC3_bp	AL357033.4	FALSE	U-2 OS	arsenite	bp	1	bp	1	low
Tcell_stim_G3BP1_bp_wt	AL357141.1	FALSE	T cell	stimulation	bp	1	bp	1	low
HeLa_ars_G3BP1_bp_wt	AL357673.1	FALSE	HeLa	arsenite	bp	1	bp	1	low
SMMC_ars_G3BP1_bp_wt	AL359740.1	FALSE	SMMC-7721	arsenite	bp	1	bp	1	low
U2OS_ars_ΔEDC3_bp	AL359918.1	FALSE	U-2 OS	arsenite	bp	1	bp	1	low
SMMC_ars_G3BP1_bp_wt	AL359921.2	FALSE	SMMC-7721	arsenite	bp	1	bp	1	low
SMMC_ars_G3BP1_bp_wt	AL359922.3	FALSE	SMMC-7721	arsenite	bp	1	bp	1	low
Tcell_stim_G3BP1_bp_wt	AL360020.1	FALSE	T cell	stimulation	bp	1	bp	1	low
SKNBE_ars_G3BP1_bp_FUS	AL360270.2	FALSE	SK-N-BE	arsenite	bp	2	bp	2	low
SKNBE_ars_G3BP1_bp_FUS-P525L	AL360270.2	FALSE	SK-N-BE	arsenite	bp	2	bp	2	low
U2OS_ars_ΔEDC3_bp	AL365181.2	FALSE	U-2 OS	arsenite	bp	4	bp	4	medium
HeLa_ars_G3BP1_bp_wt	AL365181.2	FALSE	HeLa	arsenite	bp	4	bp	4	medium
SKNBE_ars_G3BP1_bp_FUS	AL365181.2	FALSE	SK-N-BE	arsenite	bp	4	bp	4	medium
SMMC_ars_G3BP1_bp_wt	AL365181.2	FALSE	SMMC-7721	arsenite	bp	4	bp	4	medium
SKNBE_ars_G3BP1_bp_FUS	AL365181.3	FALSE	SK-N-BE	arsenite	bp	2	bp	2	low
SMMC_ars_G3BP1_bp_wt	AL365181.3	FALSE	SMMC-7721	arsenite	bp	2	bp	2	low
SKNBE_ars_G3BP1_bp_FUS	AL365330.1	FALSE	SK-N-BE	arsenite	bp	1	bp	1	low
SKNBE_ars_G3BP1_bp_FUS-P525L	AL365361.1	FALSE	SK-N-BE	arsenite	bp	1	bp	1	low
SMMC_ars_G3BP1_bp_wt	AL391058.1	FALSE	SMMC-7721	arsenite	bp	1	bp	1	low
SMMC_ars_G3BP1_bp_wt	AL391427.1	FALSE	SMMC-7721	arsenite	bp	1	bp	1	low
SKNBE_ars_G3BP1_bp_FUS-P525L	AL391834.2	FALSE	SK-N-BE	arsenite	bp	1	bp	1	low
Tcell_stim_G3BP1_bp_wt	AL392086.3	FALSE	T cell	stimulation	bp	1	bp	1	low
SKNBE_ars_G3BP1_bp_FUS	AL442125.1	FALSE	SK-N-BE	arsenite	bp	1	bp	1	low
SKNBE_ars_G3BP1_bp_FUS	AL442125.2	FALSE	SK-N-BE	arsenite	bp	1	bp	1	low
SKNBE_ars_G3BP1_bp_FUS-P525L	AL451064.2	FALSE	SK-N-BE	arsenite	bp	1	bp	1	low
SMMC_ars_G3BP1_bp_wt	AL512353.3	FALSE	SMMC-7721	arsenite	bp	1	bp	1	low
SKNBE_ars_G3BP1_bp_FUS	AL512622.1	FALSE	SK-N-BE	arsenite	bp	1	bp	1	low
HeLa_ars_G3BP1_bp_wt	AL513165.1	FALSE	HeLa	arsenite	bp	4	bp	4	medium
SKNBE_ars_G3BP1_bp_FUS	AL513165.1	FALSE	SK-N-BE	arsenite	bp	4	bp	4	medium
SKNBE_ars_G3BP1_bp_FUS-P525L	AL513165.1	FALSE	SK-N-BE	arsenite	bp	4	bp	4	medium
SMMC_ars_G3BP1_bp_wt	AL513165.1	FALSE	SMMC-7721	arsenite	bp	4	bp	4	medium
SKNBE_ars_G3BP1_bp_FUS	AL513477.1	FALSE	SK-N-BE	arsenite	bp	2	bp	2	low
SKNBE_ars_G3BP1_bp_FUS-P525L	AL513477.1	FALSE	SK-N-BE	arsenite	bp	2	bp	2	low
U2OS_ars_ΔEDC3_bp	AL513497.1	FALSE	U-2 OS	arsenite	bp	1	bp	1	low
SKNBE_ars_G3BP1_bp_FUS	AL513523.3	FALSE	SK-N-BE	arsenite	bp	1	bp	1	low
SKNBE_ars_G3BP1_bp_FUS-P525L	AL513534.3	FALSE	SK-N-BE	arsenite	bp	1	bp	1	low
SMMC_ars_G3BP1_bp_wt	AL583810.1	FALSE	SMMC-7721	arsenite	bp	1	bp	1	low
SMMC_ars_G3BP1_bp_wt	AL583856.1	FALSE	SMMC-7721	arsenite	bp	1	bp	1	low
SKNBE_ars_G3BP1_bp_FUS-P525L	AL589182.3	FALSE	SK-N-BE	arsenite	bp	1	bp	1	low
U2OS_ars_G3BP1_bp_wt	AL589743.1	FALSE	U-2 OS	arsenite	bp	4	bp	4	medium
U2OS_ars_PABPC1_bp_wt	AL589743.1	FALSE	U-2 OS	arsenite	bp	4	bp	4	medium
U2OS_sorb_G3BP1_bp_wt	AL589743.1	FALSE	U-2 OS	sorbitol	bp	4	bp	4	medium
SKNBE_ars_G3BP1_bp_FUS	AL589743.1	FALSE	SK-N-BE	arsenite	bp	4	bp	4	medium
SKNBE_ars_G3BP1_bp_FUS	AL590064.1	FALSE	SK-N-BE	arsenite	bp	1	bp	1	low
SKNBE_ars_G3BP1_bp_FUS	AL590560.3	FALSE	SK-N-BE	arsenite	bp	1	bp	1	low
SKNBE_ars_G3BP1_bp_FUS	AL590705.3	FALSE	SK-N-BE	arsenite	bp	1	bp	1	low
Tcell_stim_G3BP1_bp_wt	AL590807.1	FALSE	T cell	stimulation	bp	1	bp	1	low
SMMC_ars_G3BP1_bp_wt	AL591135.1	FALSE	SMMC-7721	arsenite	bp	1	bp	1	low
Tcell_stim_G3BP1_bp_wt	AL591501.1	FALSE	T cell	stimulation	bp	1	bp	1	low
SKNBE_ars_G3BP1_bp_FUS	AL592071.1	FALSE	SK-N-BE	arsenite	bp	1	bp	1	low
SMMC_ars_G3BP1_bp_wt	AL592293.2	FALSE	SMMC-7721	arsenite	bp	1	bp	1	low
SKNBE_ars_G3BP1_bp_FUS	AL592424.1	FALSE	SK-N-BE	arsenite	bp	1	bp	1	low
SKNBE_ars_G3BP1_bp_FUS	AL596244.1	FALSE	SK-N-BE	arsenite	bp	1	bp	1	low
SMMC_ars_G3BP1_bp_wt	AL604028.1	FALSE	SMMC-7721	arsenite	bp	1	bp	1	low
SKNBE_ars_G3BP1_bp_FUS	AL606834.1	FALSE	SK-N-BE	arsenite	bp	1	bp	1	low
U2OS_ars_ΔEDC3_bp	AL645608.2	FALSE	U-2 OS	arsenite	bp	2	bp	2	low
SMMC_ars_G3BP1_bp_wt	AL645608.2	FALSE	SMMC-7721	arsenite	bp	2	bp	2	low
SKNBE_ars_G3BP1_bp_FUS	AL645608.6	FALSE	SK-N-BE	arsenite	bp	1	bp	1	low
SMMC_ars_G3BP1_bp_wt	AL645768.1	FALSE	SMMC-7721	arsenite	bp	1	bp	1	low
SKNBE_ars_G3BP1_bp_FUS	AL662795.2	FALSE	SK-N-BE	arsenite	bp	2	bp	2	low
SKNBE_ars_G3BP1_bp_FUS-P525L	AL662795.2	FALSE	SK-N-BE	arsenite	bp	2	bp	2	low
SMMC_ars_G3BP1_bp_wt	AL669831.3	FALSE	SMMC-7721	arsenite	bp	1	bp	1	low
Tcell_stim_G3BP1_bp_wt	AL669918.1	FALSE	T cell	stimulation	bp	1	bp	1	low
SKNBE_ars_G3BP1_bp_FUS	AL671710.1	FALSE	SK-N-BE	arsenite	bp	2	bp	2	low
SKNBE_ars_G3BP1_bp_FUS-P525L	AL671710.1	FALSE	SK-N-BE	arsenite	bp	2	bp	2	low
U2OS_ars_ΔEDC3_bp	AL731556.1	FALSE	U-2 OS	arsenite	bp	1	bp	1	low
SMMC_ars_G3BP1_bp_wt	AL731568.1	FALSE	SMMC-7721	arsenite	bp	1	bp	1	low
Tcell_stim_G3BP1_bp_wt	AL731577.2	FALSE	T cell	stimulation	bp	4	bp	4	medium
HeLa_ars_G3BP1_bp_wt	AL731577.2	FALSE	HeLa	arsenite	bp	4	bp	4	medium
SKNBE_ars_G3BP1_bp_FUS	AL731577.2	FALSE	SK-N-BE	arsenite	bp	4	bp	4	medium
SKNBE_ars_G3BP1_bp_FUS-P525L	AL731577.2	FALSE	SK-N-BE	arsenite	bp	4	bp	4	medium
SMMC_ars_G3BP1_bp_wt	AL807752.1	FALSE	SMMC-7721	arsenite	bp	1	bp	1	low
SKNBE_ars_G3BP1_bp_FUS	AL928654.4	FALSE	SK-N-BE	arsenite	bp	1	bp	1	low
SKNBE_ars_G3BP1_bp_FUS-P525L	AL929602.1	FALSE	SK-N-BE	arsenite	bp	1	bp	1	low
Tcell_stim_G3BP1_bp_wt	ALAS1	TRUE	T cell	stimulation	bp	2	bp_fanci	3	low
[truncated: 40,668 more rows]
