# Supplementary material
Source: HighWire-hosted journal article supplement (doi:10.1101/rna.080409.125)
Supplement: Supplemental_Table_Legends.docx [file Supplemental_Table_Legends.docx]

**Supplemental Material**

**Supplementary Table 1.** List of datasets included in the meta-analysis of the human SG transcriptome.

**Supplementary Table 2.** List of datasets excluded from the meta-analysis.

**Supplementary Table 3.** List of SG-enriched RNAs extracted from the meta-analysis with indicated: dataset ID, gene symbol, cell system, stress type, experimental technique for SG isolation, consensus score with the +1 reward that was used to define the consensus class (“consensus_comb_technique”) and consensus class.
